# Supplementary material for: Advances in Precision Coffee Growing Research: A Bibliometric Review
Source: MDPI journal article supplement (doi:10.3390/agronomy11081557), 2021-08-05
Supplement: s1 [file s1]

Archive with 2 entries (2 files):
- Papers used in study.pdf
- scopus,WoS.csv
