# Supplementary material for: Advances in Precision Coffee Growing Research: A Bibliometric Review
Source: MDPI journal article supplement (doi:10.3390/agronomy11081557), 2021-08-05
Supplement: s1 [file s1 › Papers used in study.pdf]

| Article Title                                                                                                                                              | Authors and year         |
|------------------------------------------------------------------------------------------------------------------------------------------------------------|--------------------------|
| A Hybrid Approach to Improve Classification Accuracy of Mapping Perennial Crops in Bảo Lâm District, Lâm Đồng Province                                     | Toan et al. (2017)       |
| A Method for Detecting Coffee Leaf Rust Through Wireless Sensor Networks, Remote Sensing, And Deep Learning: Case Study of The Caturra Variety in Colombia | Velásquez et al. (2000)  |
| A Novel Vegetation Index for Coffee Ripeness Monitoring Using Aerial Imagery                                                                               | Martins et al. (2021)    |
| Agrometeorological Model Estimating the Productivity of Two Varieties of Arabic Coffee Considering the Spatial Variability                                 | Silva et al. (2011)      |
| Analysis of Flight Parameters and Georeferencing Of Images with Different Control Points Obtained by RPA                                                   | Santos et al. (2019)     |
| Analysis of Spatial Variability of Force Detachment of Coffee Fruits in Central Pivot                                                                      | Figueiredo et al. (2017) |
| Application of Electrical Resistivity Tomography for Detecting Root Biomass in Coffee Trees                                                                | Paglis (2013)            |
| Artificial Intelligence Approach for The Prediction of Robusta Coffee Yield Using Soil Fertility Properties                                                | Kouadio et al. (2018)    |
| Assessment of The Variability of The Nutritional Status and Yield of Coffee by Principal Component Analysis and Geostatistics                              | Silva & Lima (2012)      |
| Biophysical Parameters of Coffee Crop Estimated By UAV, RGB Images                                                                                         | Santos et al. (2020)     |
| Canopy Thermal Response to Water Deficit of Coffee Plants Under Drip Irrigation                                                                            | Costa et al. (2020)      |
| Coffee Crop Coefficient for Precision Irrigation Based on Leaf Area Index                                                                                  | Pereira et al. (2011)    |
| Coffee Crop Coefficient Prediction as A Function of Biophysical Variables Identified from RGB UAS Images                                                   | Santos et al. (2020)     |
| Coffee Crop Detection by Automatic Classification Using Spectral and Textural Attributes and Illumination Factor                                           | Marujo et al. (2017)     |
| Coffee Crop Yield Estimate Using an Agrometeorological-Spectral Model                                                                                      | Rosa et al. (2010)       |
| Coffee Crop's Biomass and Carbon Stock Estimation with Usage of High-Resolution Satellites Images                                                          | Coltri et al. (2013)     |
| Coffee Flower Identification Using Binarization Algorithm Based on Convolutional Neural Network for Digital Images                                         | Wei et al. (2020)        |
| Coffee Quality and Its Relationship with Brix Degree and Colorimetric Information of Coffee Cherries                                                       | Silva et al. (2014)      |
| Comparing A Single-Sensor Camera with A Multisensory Camera for Monitoring Coffee Crop Using Unmanned Aerial Vehicles                                      | Gomes et al. (2021)      |
| Comparison Between Soil Sampling Methods for Conilon Coffee Liming and Fertilization Recommendation                                                        | Oliveira et al. (2008)   |
| Comparison Between the Soil Chemical Attributes Sampled Conventionally and In Grid                                                                         | Ferraz et al. (2017)     |
| Crop Growth Monitoring with Drone-Borne DInSAR                                                                                                             | Oré et al. (2020)        |
| Definition of Management Zones in Coffee Production Fields Based on Apparent Soil Electrical Conductivity                                                  | Valente et al. (2012)    |

|                                                                                                                                                                                         |                               |
|-----------------------------------------------------------------------------------------------------------------------------------------------------------------------------------------|-------------------------------|
| Delimitation of Management Zones for Macronutrients in Of Coffee Crop Conilon Intercropping with Rubber Trees                                                                           | Santos et al. (2015)          |
| Delineation of Specific Management Areas for Coffee Cultivation Based on The Soil-Relief Relationship and Numerical Classification                                                      | Sanchez et al. (2013)         |
| Detecting and Mapping Root-Knot Nematode Infection in Coffee Crop Using Remote Sensing Measurements                                                                                     | Martins et al. (2017)         |
| Detection, Classification, And Mapping of Coffee Fruits During Harvest with Computer Vision                                                                                             | Bazame et al. (2021)          |
| Determination of Application Volume for Coffee Plantations Using Artificial Neural Networks and Remote Sensing                                                                          | Oliveira et al. (2021)        |
| Determining the Leaf Area Index and Percentage of Area Covered by Coffee Crops Using UAV RGB Images                                                                                     | Santos et al. (2020)          |
| Development and Testing of a Low-Cost Portable Apparent Soil Electrical Conductivity Sensor Using A Beagle bone Black                                                                   | Queiroz et al. (2020)         |
| Development of A Methodology to Determine the Best Grid Sampling in Precision Coffee Growing                                                                                            | Figueiredo et al. (2018)      |
| Discrimination of Areas Infected with Coffee Leaf Rust Using A Vegetation Index                                                                                                         | Katsuhama et al. (2018)       |
| Economic Viability of The Variable Rate Technology Compared to The Traditional System of Fertilization in A Coffee Field: A Case Study                                                  | Ferraz et al. (2011)          |
| Effects of Manual Harvesting on Coffee (Coffea Arabica L.) Crop Biannuality In Ijaci, Minas Gerais                                                                                      | Silva et al. (2010)           |
| Empirical Modeling of Leaf Chlorophyll Content in Coffee (Coffea Arabica) Plantations with Sentinel-2 MSI Data: Effects of Spectral Settings, Spatial Resolution, And Crop Canopy Cover | Chemura et al. (2017)         |
| Energy Consumption Evaluation of a Routing Protocol for Low-Power and Lossy Networks in Mesh Scenarios for Precision Agriculture                                                        | Sales et al. (2020)           |
| Estimating Biophysical Properties of Coffee (Coffea Canephora) Plants with Above-Canopy Field Measurements, Using Cropspec (R)                                                          | Putra et al. (2018)           |
| Estimating Vegetation Volume of Coffee Crops Using Images from Unmanned Aerial Vehicles                                                                                                 | Cunha et al. (2019)           |
| Estimation of Biophysical Parameters of Coffee Fields Based on High-Resolution Satellite Images                                                                                         | Ramirez & Zullu Júnior (2020) |
| Evaluation of A Variable Rate Fertilizer Application System Adapted to Coffee Crop                                                                                                      | Barros et al. (2015)          |
| Evapotranspiration and Crop Coefficient of Coffee Plants from Orbital Sensors Images                                                                                                    | Dias et al. (2019)            |
| Failure Detection in Row Crops from UAV Images Using Morphological Operators                                                                                                            | Oliveira et al. (2018)        |
| Feasibility of Monitoring Coffee Field Ripeness with Airborne Multispectral Imagery                                                                                                     | Johnson et al. (2004)         |
| Fuzzy Logic for Evaluation of The Fertility of Soil and Productivity of Conilon Coffee                                                                                                  | Silva et al. (2010)           |
| Fuzzy Logic in The Spatial and Temporal Distribution in The Quality of the Beverage in Conilon Coffee                                                                                   | Fonseca et al. (2019)         |
| Fuzzy Logic to Map of Variables Indicative of Soil Fertility                                                                                                                            | Silva & Lima (2009)           |

|                                                                                                                                     |                             |
|-------------------------------------------------------------------------------------------------------------------------------------|-----------------------------|
| Geostatistical Analysis of Arabic Coffee Yield in Two Crop Seasons                                                                  | Carvalho et al. (2017)      |
| Geostatistical Analysis of Fruit Yield and Detachment Force in Coffee                                                               | Ferraz et al. (2012)        |
| Geostatistical Modeling of The Spatial Variability of Coffee Fine Roots Under Erythrina Shade Trees and Contrasting Soil Management | Mora & Beer (2013)          |
| Imaging from An Unmanned Aerial Vehicle: Agricultural Surveillance and Decision Support                                             | Herwitz et al. (2004)       |
| Improving Nitrogen Assessment with An RGB Camera Across Uncertain Natural Light from Above-Canopy Measurements                      | Putra & Soni (2020)         |
| Land Use Patterns for Driving Environmental Management of Tea Agricultural Croplands                                                | Ozcelik & Nisanci (2016)    |
| Leaf Area Index as An Indicator of Ecosystem Services and Management Practices: An Application for Coffee Agroforestry              | Taugourdeau et al. (2014)   |
| Leaf Water Potential of Coffee Estimated by Landsat-8 Images                                                                        | Maciel et al. (2020)        |
| Machine Learning Prediction of Coffee Rust Severity on Leaves Using Spectroradiometer Data                                          | Chemura et al. (2018)       |
| Management Areas Due to Soil Properties, Topography and Productivity of Coffee Plantations                                          | Melo et al. (2017)          |
| Management Zones in Coffee Cultivation                                                                                              | Jacintho et al. (2017)      |
| Mapping Coffee Crops in Southeastern Brazil Using Spectral Mixture Analysis and Data Mining Classification                          | Kawakubo et al. (2016)      |
| Mapping Spatial Variability of Foliar Nitrogen in Coffee (Coffea Arabica L.) Plantations with Multispectral Sentinel-2 MSI Data     | Chemura et al. (2018)       |
| Methodology for Selective Coffee Harvesting in Management Zones of Yield and Maturation                                             | Kazama et al. (2021)        |
| Methodology to Determine the Soil Sampling Grid for Precision Agriculture in A Coffee Field                                         | Ferraz et al. (2017)        |
| Methods of Interpolation for Estimating the Ph In Soil Under Two Management of Coffee Arabic                                        | Silva et al. (2010)         |
| Modeling Spatial Variability and Pattern of Rust and Brown Eye Spot in Coffee Agroecosystem                                         | Alves et al. (2009)         |
| Multi-Scale Measurements Show Limited Soil Greenhouse Gas Emissions in Kenyan Smallholder Coffee-Dairy Systems                      | Ortiz-Gonzalo et al. (2018) |
| Multispectral Radiometric Characterization of Coffee Rust Epidemic in Different Irrigation Management Systems                       | Pires et al. (2020)         |
| Multispectral Radiometric Monitoring of Bacterial Blight of Coffee                                                                  | Marin et al. (2019)         |
| Multispectral Remote Sensing in The Identification and Mapping of Biotic and Abiotic Coffee Tree Variables                          | Marin et al. (2019)         |
| Multivariate Analysis and Geostatistics Of the Fertility of a Humic Rhodic Hapludox Under Coffee Cultivation                        | Silva & Lima (2012)         |
| Neural Network Algorithm for Coffee Ripeness Evaluation Using Airborne Images                                                       | Furfaro et al. (2007)       |
| New Low-Cost Portable Sensing System Integrated with On-The-Go Fertilizer Application System for Plantation Crops                   | Putra (2020)                |
| Nutritional Balance and Its Relationship to Yield in A Coffee Field: Inferences from Geospatial Analysis                            | Silva et al. (2020)         |
| On the Use of Soil Hydraulic Conductivity Functions in The Field                                                                    | Silva et al. (2007)         |

|                                                                                                                                                       |                            |
|-------------------------------------------------------------------------------------------------------------------------------------------------------|----------------------------|
| Performance of A Variable-Rate Distribution System for Simultaneous Fertilizer Application                                                            | Barros et al. (2016)       |
| Physical Attributes of Soil and Its Relation with Space Productivity of Coffee Arabic                                                                 | Silva & Lima (2013)        |
| Planning Sample of Chemical Soil Properties on A Conilon Coffee Plantation                                                                            | Santos et al. (2013)       |
| Plant Sampling Grid Determination in Precision Agriculture in Coffee Field                                                                            | Ferraz et al. (2018)       |
| Precision Agriculture to Study Soil Chemical Properties and The Yield of a Coffee Field                                                               | Ferraz et al. (2012)       |
| Precision Agriculture: An Alert to Imprecision - Case Study on Coffee Growing                                                                         | Almeida & Guimaraes (2017) |
| Precision Techniques and Agriculture 4.0 Technologies to Promote Sustainability in The Coffee Sector: State of The Art, Challenges and Future Trends  | Sott et al. (2020)         |
| Principal Components in The Study of Soil and Plant Properties in Precision Coffee Farming                                                            | Ferraz et al. (2019)       |
| Probabilistic Yield Forecasting of Robusta Coffee at The Farm Scale Using Agroclimatic And Remote Sensing Derived Indices                             | Kouadio et al. (2021)      |
| Processing Multispectral Imaging Captured by Drones to Evaluate the Normalized Difference Vegetation Index of Castillo Coffee Plantations             | Rivera et al. (2021)       |
| Relationship Between Coffee Crop Productivity and Vegetation Indexes Derived from Oli / Landsat-8 Sensor Data with And Without Topographic Correction | Nogueira et al (2018)      |
| Relationship Between Sentinel-2 Orbital Data and In Situ Monitoring of Coffee Rust                                                                    | Cortez et al. (2020)       |
| Remote Sensing Leaf Water Stress in Coffee (Coffea Arabica) Using Secondary Effects of Water Absorption and Random Forests                            | Chemura et al. (2017)      |
| Remotely Piloted Aircraft and Random Forest in The Evaluation of The Spatial Variability of Foliar Nitrogen in Coffee Crop                            | Marin et al. (2021)        |
| Remotely Sensed Phenology of Coffee and Its Relationship to Yield                                                                                     | Brunsell & Pontes (2009)   |
| Sampling Density for Characterizing the Physical Quality of a Soil Under Coffee Cultivation in Southwestern Minas Gerais                              | Silvero et al. (2018)      |
| Sampling Design of Soil Physical Properties in A Conilon Coffee Field                                                                                 | Santos et al. (2017)       |
| Scaling of Pores In 3D Images of Latosols (Oxisols) With Contrasting Mineralogy Under A Conservation Management System                                | Carducci et al. (2014)     |
| Seasonal Behavior of Vegetation Determined by Sensor on An Unmanned Aerial Vehicle                                                                    | Felix et al. (2021)        |
| Sensor Fusion of a Mobile Device to Control and Acquire Videos or Images of Coffee Branches and For Georeferencing Trees                              | Giraldo et al. (2017)      |
| Separability of Coffee Leaf Rust Infection Levels with Machine Learning Methods at Sentinel-2 MSI Spectral Resolutions                                | Chemura et al. (2017)      |
| Soil Moisture in The Root Zone and Its Relation to Plant Vigor Assessed by Remote Sensing at Management Scale                                         | Santos et al. (2014)       |

|                                                                                                                            |                                                                  |
|----------------------------------------------------------------------------------------------------------------------------|------------------------------------------------------------------|
| Soil Moisture Space-Time Analysis to Support Improved Crop Management                                                      | Silva et al. (2015)                                              |
| Soil Organic Matter Loss by Water Erosion in A Coffee Organic Farm                                                         | Lense et al. (2020)                                              |
| Space Analysis of Water Erosion in The Red-Yellow Latosol Under Conilon Coffee Cultivation                                 | Silvan, SD; Lima, JSD; de Oliveira, RB; de Souza, GS; Silva, MDE |
| Spatial and Temporal Variability of Phosphorus, Potassium and Of the Yield of a Coffee Field                               | Ferraz et al. (2012)                                             |
| Spatial Distribution of Attack of Coffee Berry Borer in Conilon Coffee                                                     | Silva et al. (2017)                                              |
| Spatial Distribution of The Root System of Conilon And Arabica Coffee Plants                                               | Partelli et al. (2020)                                           |
| Spatial Estimation of Foliar Phosphorus in Different Species of The Genus Coffea Based on Soil Properties                  | Silva & Lima (2014)                                              |
| Spatial Relationship Between the Stock of Nutrients and Density of a Soil Cultivated with Coffee Plants                    | Silva & Lima (2013)                                              |
| Spatial Variability of Aggregates and Organic Carbon Under Three Different Uses of Indian Black Earth in Southern Amazonas | Gomes et al. (2017)                                              |
| Spatial Variability of Apparent Electrical Conductivity and Soil Properties in A Coffee Production Field                   | Valente et al. (2014)                                            |
| Spatial Variability of Chemical Attributes and Coffee Productivity in Two Harvests                                         | Silva et al. (2008)                                              |
| Spatial Variability of Chemical Attributes and Productivity in The Coffee Cultivation                                      | Silva et al. (2007)                                              |
| Spatial Variability of Chemical Attributes of An Oxisol Under Coffee Cultivation                                           | Silva et al. (2010)                                              |
| Spatial Variability of Coffee Plant Water Consumption Based on The Sebal Algorithm                                         | Costa et al. (2019)                                              |
| Spatial Variability of Leaf Wetness Duration in Different Crop Canopies                                                    | Sentelhas et al. (2005)                                          |
| Spatial Variability of Macronutrients in A Crop of Conilon Coffee in The North of Espirito Santo                           | Santos et al. (2015)                                             |
| Spatial Variability of Particle Size Fractions of An Oxisol Cultivated with Conilon Coffee                                 | Lima et al. (2012)                                               |
| Spatial Variability of Ph In Coffee Plants Under Fertigation and Traditional System of Fertilizing                         | Rezende et al. (2012)                                            |
| Spatial Variability of Physical Attributes of a Dystroferic Red Latosol Under Different Managements                        | Simoes et al. (2006)                                             |
| Spatial Variability of Physical Attributes of The Soil in Amazonian Black Soil Under Coffee Cultivation                    | Mota et al. (2017)                                               |
| Spatial Variability of Physical Properties: Relationship with Relief, Organic Matter and Productivity in Conilon Coffee    | Burak et al. (2016)                                              |
| Spatial Variability of Plant Attributes in A Coffee Plantation                                                             | Ferraz et al. (2017)                                             |
| Spatial Variability of Pores in Oxidic Latosol Under A Conservation Management System with Different Gypsum Doses          | Carducci et al. (2014)                                           |
| Spatial Variability of Precompression Stress and Volumetric Water Content of a Red-Yellow Latosol (Oxisol)                 | Kamimura et al. (2020)                                           |

|                                                                                                                                                      |                               |
|------------------------------------------------------------------------------------------------------------------------------------------------------|-------------------------------|
| Spatial Variability of Soil Acidity Attributes and Liming Requirement for Conilon Coffee                                                             | Santos et al. (2014)          |
| Spatial Variability of Soil Chemical Attributes in Arabica Coffee (Coffea Arabica L.) Fields Under Different Management Systems                      | Silva et al. (2010)           |
| Spatial Variability of Soil Chemical Attributes in Conilon Coffee Plantation: Relationships with Soil Texture, Organic Matter and Relief             | Burak et al. (2012)           |
| Spatial Variability of Soil Chemical Properties After Coffee Tree Removal                                                                            | Vieira et al. (2009)          |
| Spatial Variability of Soil Electrical Conductivity in An Area with Coffee (Coffea Arabica L.) Fertilized Via Fert irrigation And Traditional System | Rezende et al. (2010)         |
| Spatial Variability of Soil Fertility Attributes and Productivity in A Coffee Crop Farm                                                              | Ferraz et al. (2019)          |
| Spatial Variability of Soil Penetration Resist in Coffee Growing                                                                                     | Andrade et al. (2018)         |
| Spatial Variability of Soil Physical Attributes and Agronomic Characteristics of Coffee Crop                                                         | Carvalho et al. (2013)        |
| Spatial Variability of Soil Physical Properties in Archeological Dark Earths Under Different Uses in Southern Amazon                                 | Brito et al. (2018)           |
| Spatial Variability of The Chemical Properties of The Soil in The Coffee Yield and Quality                                                           | Rodríguez-Garay et al. (2016) |
| Spatial Variability of The Detachment Force of Coffee Fruit                                                                                          | Ferraz et al. (2014)          |
| Spatial Variability of The Dosage of P2O5 And K2O To Fertilize in A Variable Rate and In A Conventional Way in A Coffee Field                        | Ferraz et al. (2015)          |
| Spatial Variability of The Noise Generated by A Portable Harvester in A Coffee Field                                                                 | Ferraz et al. (2013)          |
| Spatial Variability of The Nutritional Condition of Canephora Coffee Aiming Specific Management                                                      | Oliveira et al. (2010)        |
| Spatial Variability of The Physical Properties of a Red Yellow Latosol Under Coffee                                                                  | Kamimura et al. (2013)        |
| Spatial Variability of The Productivity and The Nutritional Condition of Coffee Canephora                                                            | Fonseca et al. (2015)         |
| Spatio-Temporal Variability of Carbohydrate and Chlorophyll Content in The Coffee Canopy                                                             | Santini et al. (2019)         |
| Spectral Analysis and Classification Accuracy of Coffee Crops Using Landsat And A Topographic-Environmental Model                                    | Cordero-Sancho & Sader (2007) |
| Technical and Economic Viability of Manual Harvesting Coffee Yield Maps                                                                              | Faria et al. (2020)           |
| Temporal Variability of Soil Water Storage Evaluated for A Coffee Field                                                                              | Timm et al. (2011)            |
| Test Procedure for Variable Rate Fertilizer on Coffee                                                                                                | Molin et al. (2010)           |
| The Relationship Between Apparent Soil Electrical Conductivity and Soil Properties                                                                   | Valente et al. (2012)         |
| The Use of Machine Learning in Digital Processing of Satellite Images Applied to Coffee Crop                                                         | Miranda & Alves (2020)        |
| Unmanned Aerial Vehicle to Evaluate Frost Damage in Coffee Plants                                                                                    | Marin et al. (2021)           |
| Use of Data Mining and Spectral Profiles to Differentiate Condition After Harvest of Coffee Plants                                                   | Lamparelli et al. (2012)      |

|                                                                                                                              |                         |
|------------------------------------------------------------------------------------------------------------------------------|-------------------------|
| Use of Kriging Techniques to Estimate Conilon Coffee Productivity                                                            | Lima et al. (2016)      |
| Using Unmanned Aerial Vehicle and Machine Learning Algorithm to Monitor Leaf Nitrogen in Coffee                              | Parreiras et al. (2020) |
| Variability and Spatial Correlation of Aggregates and Organic Carbon in Indian Dark Earth in Apuí Region, Am                 | Gomes et al. (2018)     |
| Variation in The Flow Rate of Drip Emitters in A Subsurface Irrigation System for Different Soil Types                       | Nogueira et al. (2021)  |
| Visual Analysis and X-Ray Computed Tomography for Assessing the Spatial Variability of Soil Structure in A Cultivated Oxisol | Carducci et al. (2017)  |
| Water Erosion in Oxisols Under Coffee Cultivation                                                                            | Henrique et al. (2018)  |
| Yield Mapping of Arabic Coffee and Their Relationship with Plant Nutritional Status                                          | Silva et al. (2013)     |
