# Supplementary material for: Advances in Precision Coffee Growing Research: A Bibliometric Review
Source: MDPI journal article supplement (doi:10.3390/agronomy11081557), 2021-08-05
Supplement: s1 [file s1 › scopus,WoS.csv]

Authors	Author(s) ID	Title	Year	Source title	Volume	Issue	Art. No.	Page start	Page end	Page count	Cited by	DOI	Link	Affiliations	Authors with affiliations	Author Keywords	Index Keywords	Funding Text 1	Funding Text 2	Funding Text 3	References	Correspondence Address	Editors	Publisher	ISSN	ISBN	CODEN	Language of Original Document	Abbreviated Source Title	Document Type	Publication Stage	Open Access	Source	EID
Toan L.Q., Cu P.V., Thanh B.Q., Hoa P.V., Long V.H., Trang N.T.Q., Hauser L.T.	57197817082;57200944002;57200945587;55625826200;57197810857;57197823605;57195250901;	A Hybrid Approach To Improve Classification Accuracy Of Mapping Perennial Crops In Bảo Lâm District, Lâm Đồng Province	2017	International Journal of Geoinformatics	13	4		25	35				https://www.scopus.com/inward/record.uri?eid=2-s2.0-85042633786&partnerID=40&md5=d4092ffa8ea7555259f7f5b0798559d3	Vietnam Academy of Science and Technology, Viet Nam; VNU University of Science, Viet Nam; Vietnam Academy of Science and Technology, Viet Nam; Leiden University, Netherlands;	Toan, L.Q., Space Technology Institute, Vietnam Academy of Science and Technology, Viet Nam; Cu, P.V., Department of Geography, VNU University of Science, Viet Nam; Thanh, B.Q., Department of Geography, VNU University of Science, Viet Nam; Hoa, P.V., HCM Institute of Resources Geography, Vietnam Academy of Science and Technology, Viet Nam; Long, V.H., Space Technology Institute, Vietnam Academy o…		accuracy assessment; classification; crop plant; mapping method; perennial plant; pixel; remote sensing; Lam Dong; Tay Nguyen; Viet Nam	The authors are grateful to Space Technology Institute, Vietnam Academy of Science and Technology. We thank the anonymous reviewers for useful comments and insights.			Bemardes, T., Moreira, M.A., Adami, M., Giarolla, A., Rudorff, B.F.T., Monitoring Biennial Bearing Effect on Coffee Yield using MODIS Remote Sensing Imagery (2012) Remote Sensing, 4 (12), pp. 2492-2509; Chen, B., Li, X., Xiao, X., Zhao, B., Dong, J., Kou, W., Qin, Y., Xie, G., Mapping Tropical Forests and Deciduous Rubber Plantations in Hainan Island, China by Integrating PALSAR 25-m and Multi-Te…	Toan, L.Q.; Space Technology Institute, Viet Nam		Association for Geoinformation Technology	16866576			English	Int. J. Geoinformatics	Article	Final		Scopus	2-s2.0-85042633786
Velásquez D., Sánchez A., Sarmiento S., Toro M., Maiza M., Sierra B.	57198228806;57215583246;57215591962;55867479200;55292734000;6604043456;	A Method For Detecting Coffee Leaf Rust Through Wireless Sensor Networks, Remote Sensing, And Deep Learning: Case Study Of The Caturra Variety In Colombia	2020	Applied Sciences (Switzerland)	10	2	697				8	10.3390/app10020697	https://www.scopus.com/inward/record.uri?eid=2-s2.0-85081237683&doi=10.3390%2fapp10020697&partnerID=40&md5=8eb757fae70cab7f3d7ef8bdf0f6f2fd	Universidad EAFIT, Colombia; Vicomtech Foundation, Basque Research and Technology Alliance (BRTA), Spain; University of Basque Country, Spain;	Velásquez, D., I+D+i on Information Technologies and Communications Research Group, Universidad EAFIT, Carrera 49 No. 7 Sur - 50, Medellín, 050022, Colombia, Department of Data Intelligence for Energy and Industrial Processes, Vicomtech Foundation, Basque Research and Technology Alliance (BRTA), Donostia-San Sebastián, 20014, Spain, Department of Computer Science and Artificial Intelligence, Univ…	Agriculture 4.0; Coffee leaf rust; Deep learning; Fourth Industrial Revolution; Machine learning; Remote sensing		This research was funded by Universidad EAFIT internal research projects and Colciencias "Jovenes Investigadores e Innovadores por la paz 2017". We would like to thank Engineer Carlos Mario Ospina for his support during the visit to CENICAF?'s Experimental Station "El Rosario", as well as coffee grower Nabor Giraldo, Diego Miguel Sierra, and Dentist Samuel Rold?n for their support in the procurem…			Esposito, M., (2018) Driving the Sustainability of Production Systems with Fourth Industrial Revolution Innovation, , White Paper; World Economic Forum: Colony, Switzerland; (2011) ISIC REV. 3 TECHNOLOGY INTENSITY DEFINITION: Classification of Manufacturing Industries into Categories Based on R and D Intensities, , OECD: Paris, France; Chen, Y., Zhang, C., Wang, S., Li, J., Li, F., Yang, X., Wang…	Velásquez, D.; I+D+i on Information Technologies and Communications Research Group, Carrera 49 No. 7 Sur - 50, Colombia; email: dvelas25@eafit.edu.co		MDPI AG	20763417			English	Appl. Sci.	Article	Final	All Open Access, Gold	Scopus	2-s2.0-85081237683
De Assis Silva S., De Souza Lima J.S., De Oliveira R.B.	25637770400;35105264900;15047730700;	Agrometeorological Model Estimating The Productivity Of Two Varieties Of Arabic Coffee Considering The Spatial Variability [Modelo Agrometeorológico Na Estimativa Da Produtividade De Duas Variedades De Café Arábica Considerando A Variabilidade Espacial]	2011	IRRIGA	16	1		1	10		3		https://www.scopus.com/inward/record.uri?eid=2-s2.0-80052445219&partnerID=40&md5=1f52242fc05d662b1b39b5f2a4f7a962	Federal University of Viçosa, brazil ; Federal University of Espírito Santo, brazil ; State University São Paulo, brazil ;	de Assis Silva, S., Engenharia Agrícola, UFV, Viçosa - MG, Brazil; de Souza Lima, J.S., UFES, Alegre - ES, Brazil; de Oliveira, R.B., Energia na Agricultura, UNESP, Botucatu, SP, Brazil	Forecast of harvest; Geoestatistic; Precipitation	agricultural production; agrometeorology; coffee; estimation method; forecasting method; geostatistics; harvesting; numerical model; precipitation (climatology); spatial variation; Brazil; Minas Gerais				Alfonsi, E.L., (2008) Uso De Índices Fenológicos Em Modelos De Previsão De Produtividade Do Cafeeiro, p. 104. , Tese (Doutorado - Agronomia). Escola Superior de Agricultura Luiz de Queiroz. Piracicaba; Alves, E.A., (2009) Variabilidade Espacial E Temporal Da Qualidade Do Café Cereja Produzido Na Região Das Serras De Minas, p. 121. , Tese (Doutorado - Engenharia Agrícola). Federal University of de…	Silva, S.; Engenharia Agrícola, UFV, Viçosa - MG, Brazil; email: samuel-assis@hotmail.com			14137895			English; Portuguese	Irriga	Article	Final		Scopus	2-s2.0-80052445219
Santos L.M.D., Ferraz G.A.S., Andrade M.T., Santana L.S., Barbosa B.D.S., Maciel D.T., Rossi G.	57212211074;55322659100;57212213909;57208742161;56814632200;57209292142;56244886400;	Analysis Of Flight Parameters And Georeferencing Of Images With Different Control Points Obtained By Rpa	2019	Agronomy Research	17	5		2054	2063		4	10.15159/AR.19.173	https://www.scopus.com/inward/record.uri?eid=2-s2.0-85076217981&doi=10.15159%2fAR.19.173&partnerID=40&md5=ffce1781948d7599e536190341262fb2	federal university of lavras, brazil; Federal University of Lavras, brazil; University of Florence, Italy;	Santos, L.M.D., Federal University of Lavras, Department of Agricultural Engineering, University Campus, Lavras, MG BR37.200-000, Brazil; Ferraz, G.A.S., Federal University of Lavras, Department of Agricultural Engineering, University Campus, Lavras, MG BR37.200-000, Brazil; Andrade, M.T., Federal University of Lavras, Department of Agricultural Engineering, University Campus, Lavras, MG BR37.200…	Geometric error; Orthorectification of images; Overlap; Photogrammetry; UAS (Unmanned Aircraft System)		ACKNOWLEDGEMENTS. The authors thank, the Foundation for Research of the State of Minas Gerais (FAPEMIG), the National Council for Scientific and Technological Development (CNPq), the Coordination for the Improvement of Higher Education Personnel (CAPES), the Federal University of Lavras (UFLA) and University of Firenze (UniFI).			Agüera-Vega, F., Carvajal-Ramírez, F., Martínez-Carricondo, P., Assessment of photogrammetric mapping accuracy based on variation ground control points number using unmanned aerial vehicle (2017) Measurement, 98, pp. 221-227; Caldas, A.L.D., Lima, E.M.C., Rezende, F.C., Faria, M.A.D., Diotto, A.V., Júnior, M.C.R.L., Yield and quality of coffee cv. Travessia under different irrigation and phosphat…	Santos, L.M.D.; Federal University of Lavras, University Campus, Brazil; email: luanna_mendess@yahoo.com.br		Eesti Pollumajandusulikool	1406894X			English	Agron. Res.	Article	Final		Scopus	2-s2.0-85076217981
Figueiredo V.C., Silva Ferraz G.A., Da Silva F.M., Da Conceição F.G., Cirilo Carvalho L.C.	56009377100;55322659100;55126474900;57073548700;57194510513;	Analysis Of Spatial Variability Of Force Detachment Of Coffee Fruits In Central Pivot [Análise Da Variabilidade Espacial Da Força De Desprendimento Dos Frutos Do Cafeeiro Sob Pivô Central]	2017	Coffee Science	12	2		84	92		1		https://www.scopus.com/inward/record.uri?eid=2-s2.0-85020393073&partnerID=40&md5=e436b859678af5f68a4b06caccbc9764	federal university of lavras, brazil;	Figueiredo, V.C., Federal University of de Lavras/UFLA, Departamento de Engenharia Agrícola/DEG, Cx. P. 3037, Lavras, MG, 37.200-000, Brazil; Silva Ferraz, G.A., Federal University of de Lavras/UFLA, Departamento de Engenharia Agrícola/DEG, Cx. P. 3037, Lavras, MG, 37.200-000, Brazil; da Silva, F.M., Federal University of de Lavras/UFLA, Departamento de Engenharia Agrícola/DEG, Cx. P. 3037, Lavra…	Coffea arabica; Coffee; Georeferencing; Thematic maps					Alves, M.C., Geostatistical analysis of the spatial variation of the berry borer and leaf miner in a coffee agroecosystem (2011) Precision Agriculture, 12 (1), pp. 18-31. , Dordrecht, Feb; Alves, M.C., Modeling spatial variability and pattern of rust and brown eye spot in coffee agroecosystem (2009) Journal of Pest Science, 82 (2), pp. 137-148. , Berlin, May; Amaral, J.A.T., Crescimento vegetativ…			Editora UFLA	18096875			Portuguese	Coffee Sci.	Article	Final		Scopus	2-s2.0-85020393073
Paglis C.M.	34572539200;	Application Of Electrical Resistivity Tomography For Detecting Root Biomass In Coffee Trees	2013	International Journal of Geophysics	2013		383261				15	10.1155/2013/383261	https://www.scopus.com/inward/record.uri?eid=2-s2.0-84893869020&doi=10.1155%2f2013%2f383261&partnerID=40&md5=fa844d12c7ec2fe819673eddaa622c3f	federal university of lavras, brazil;	Paglis, C.M., Department of Agriculture, Federal University of Lavras, 37200-000 Lavras, MG, Brazil						Fitter, A., Waisel, Y., Eshel, A., Kafkai, U., Characteristics and functions of root systems (1996) Plant Roots: The Hidden Half, p. 1002. , 2nd New York, NY, USA Marcel Dekker; Box, J.E., Waisel, Y., Eshel, A., Kafkai, U., Modern methods for root investigation (1996) Plant Roots: The Hidden Half, p. 1002. , 2nd New York, NY, USA Marcel Dekker; Bohm, W., (1979) Method of Studying Root Systems, , …	Paglis, C.M.; Department of Agriculture, , 37200-000 Lavras, MG, Brazil; email: paglismau@dag.ufla.br			1687885X			English	Int. J. Geophys.	Article	Final	All Open Access, Gold, Green	Scopus	2-s2.0-84893869020
Kouadio L., Deo R.C., Byrareddy V., Adamowski J.F., Mushtaq S., Phuong Nguyen V.	55043749800;8630380500;57204451427;57217779740;16549989300;57204455328;	Artificial Intelligence Approach For The Prediction Of Robusta Coffee Yield Using Soil Fertility Properties	2018	Computers and Electronics in Agriculture	155			324	338		22	10.1016/j.compag.2018.10.014	https://www.scopus.com/inward/record.uri?eid=2-s2.0-85055653137&doi=10.1016%2fj.compag.2018.10.014&partnerID=40&md5=a8e14f4132274586019feb267e8333f0	University of Southern Queensland, Austrália; University of Southern Queensland, Austrália; McGill University, Canada, Buon Ma Thuot, Viet Nam;	Kouadio, L., Centre for Applied Climate Sciences, Institute for Life Sciences and the Environment, University of Southern Queensland, Toowoomba, QLD 4350, Australia; Deo, R.C., School of Agricultural, Computational and Environmental Science, Centre for Sustainable Agricultural Systems & Centre for Applied Climate Sciences, Institute for Life Sciences and the Environment, University of Southern Qu…	Extreme learning machine; Machine learning in agriculture; Robusta coffee; Smallholder farms; Soil fertility	Agriculture; Couplings; Decision support systems; Decision trees; Forecasting; Knowledge acquisition; Learning systems; Linear regression; Mean square error; Potassium; Statistical tests; Sulfur; Artificial intelligence algorithms; Efficiency coefficient; Extreme learning machine; Model performance comparisons; Multiple linear regressions; Robusta coffee; Root mean square errors; Soil fertility; …	We would like to thank the University of Southern Queensland , Australia for the support though the University’s Strategic Research Fund initiative. We are also thankful to the ECOM ’s (Vietnam) field survey team for their assistance in collecting and processing field data. We thank both anonymous reviewers and the journal Editor for their constructive comments.			Allison, L.E., Bollen, W.B., Moodie, C.D., (1965), pp. 1346-1366. , Total Carbon, In: Norman, A.G. (Ed.), Methods of Soil Analysis. Part 2. Chemical and Microbiological Properties. American Society of Agronomy, Soil Science Society of America, Madison, WI; Apaydın, A., Kutsal, A., Atakan, C., (1994), Ankara Uygulamalı İstatistik [Statistics in Practice], Baran Ofset, Ankara, Turkey; Ali, M., Deo,…	Kouadio, L.; Centre for Applied Climate Sciences, Australia; email: Louis.Kouadio@usq.edu.au		Elsevier B.V.	1681699		CEAGE	English	Comput. Electron. Agric.	Article	Final		Scopus	2-s2.0-85055653137
Silva S.D.A., Lima J.S.D.S.	25637770400;35105264900;	Assessment Of The Variability Of The Nutritional Status And Yield Of Coffee By Principal Component Analysis And Geostatistics [Avaliação Da Variabilidade Do Estado Nutricional E Produtividade De Café Por Meio Da Análise De Componentes Principais E Geoestatística]	2012	Revista Ceres	59	2		271	277		9	10.1590/S0034-737X2012000200017	https://www.scopus.com/inward/record.uri?eid=2-s2.0-84865638380&doi=10.1590%2fS0034-737X2012000200017&partnerID=40&md5=5789b763d9c33b9f49dda4327d650a53	State University Santa Cruz, Brazil; Federal University of Espírito Santo, brazil ;	Silva, S.D.A., Departamento de Ciencias Agrarias e Ambientais, Universidade Estadual de Santa Cruz, Rodovia Ilheus/Itabuna, Km 16, 45662-900, Ilheus, Bahia, Brazil; Lima, J.S.D.S., Departamento de Engenharia Rural, Federal University of do Espirito Santo, Alto Universitario, 20500-000, Alegre, Espirito Santo, Brazil	Coffee arabica L.; Foliar analysis; Multvariate analysis; Vegetal nutrition	Coffea arabica				Bataglia, O.C., Quaggio, J.A., Santos, W.R., Abreu, M.F., Diagnose nutricional do cafeeiro pelo DRIS variando-se a constante de sensibilidade dos nutrientes de acordo com a intensidade e freqüência de resposta na produção (2004) Bragantia, 2, pp. 253-263; Cambardella, C.A., Moorman, T.B., Novak, J.M., Parkin, T.B., Karlen, D.L., Turco, R.F., Konopka, A.E., Field-scale variability of soil properti…	Silva, S.D.A.; Departamento de Ciencias Agrarias e Ambientais, Km 16, 45662-900, Ilheus, Bahia, Brazil; email: samuel-assis@hotmail.com			0034737X			Portuguese	Rev. Ceres	Article	Final	All Open Access, Gold	Scopus	2-s2.0-84865638380
Dos Santos L.M., Ferraz G.A.S., Barbosa B.D.S., Diotto A.V., Maciel D.T., Xavier L.A.G.	57215592856;55322659100;56814632200;24586686800;57209292142;57216588767;	Biophysical Parameters Of Coffee Crop Estimated By Uav Rgb Images	2020	Precision Agriculture	21	6		1227	1241		3	10.1007/s11119-020-09716-4	https://www.scopus.com/inward/record.uri?eid=2-s2.0-85084077482&doi=10.1007%2fs11119-020-09716-4&partnerID=40&md5=8b2901c0190f4a1b16aa7f8a8647c340	federal university of lavras, brazil; Federal University of Lavras, brazil;	dos Santos, L.M., Agricultural Engineering Department, Federal University of Lavras, P.O BOX 3037, Lavras, MG CEP 37200-000, Brazil; Ferraz, G.A.S., Agricultural Engineering Department, Federal University of Lavras, P.O BOX 3037, Lavras, MG CEP 37200-000, Brazil; Barbosa, B.D.S., Agricultural Engineering Department, Federal University of Lavras, P.O BOX 3037, Lavras, MG CEP 37200-000, Brazil; Dio…	Aerial survey; Remote sensing; Structure from motion; Tree height; Unmanned aircraft system	algorithm; biophysics; coffee; correlation; estimation method; experimental study; parameterization; photogrammetry; plantation; satellite imagery; software; unmanned vehicle; Brazil; Minas Gerais	The authors would like to thank the National Council for Scientific and Technological Development (CNPq) for the financing of equipment and the Coordination for the Improvement of Higher Education Personnel (Capes) for the granting of scholarships.			Bater, C.W., Coops, N.C., Wulder, M.A., Hilker, T., Nielsen, S.E., McDermid, G., Stenhouse, G.B., Using digital time-lapse cameras to monitor species-specific understorey and overstorey phenology in support of wildlife habitat assessment (2011) Environmental Monitoring and Assessment, 180 (1-4), pp. 1-13; Bendig, J., Bolten, A., Bennertz, S., Broscheit, J., Eichfuss, S., Bareth, G., Estimating bi…	dos Santos, L.M.; Agricultural Engineering Department, P.O BOX 3037, Brazil; email: luanna_mendess@yahoo.com.br		Springer	13852256		PREAF	English	Precis. Agric.	Article	Final		Scopus	2-s2.0-85084077482
Pereira A.R., De Camargo M.B.P., Nova N.A.V.	7402230428;7003957933;6505880978;	Coffee Crop Coefficient For Precision Irrigation Based On Leaf Area Index [Coeficiente De Cultivo De Cafezais Com Base No Índice De Área Foliar Para Irrigação De Precisão]	2011	Bragantia	70	4		946	951		5	10.1590/S0006-87052011000400030	https://www.scopus.com/inward/record.uri?eid=2-s2.0-84856777443&doi=10.1590%2fS0006-87052011000400030&partnerID=40&md5=4cc52014070912baeaea92eb5bb290e1	University of São Paulo, Brazil; Centro de Pesquisa e Desenvolvimento de Ecofisiologia e Biofísica, brazil ;	Pereira, A.R., ESALQ/USP, Departamento de Engenharia de Biossistemas, Av Padua Dias 11, 13418-900 Piracicaba (SP), Brazil; de Camargo, M.B.P., Instituto Agronômico, Centro de Pesquisa e Desenvolvimento de Ecofisiologia e Biofísica, Caixa Postal 28, 13001-970 Campinas (SP), Brazil; Nova, N.A.V., ESALQ/USP, Departamento de Engenharia de Biossistemas, Av Padua Dias 11, 13418-900 Piracicaba (SP), Bra…	Coffea arábica L.; Planting density; Reference evapotranspiration; Soil water balance	coffee; evapotranspiration; experimental study; grass; hypothesis testing; irrigation system; leaf area index; plantation; precision agriculture; soil water; tree planting; volume; Coffea arabica				Al-Kaisi, M., Brun, L.J., Enz, J.W., Transpiration and evapotranspiration from maize as related to leaf area index (1989) Agricultural and Forest Meteorology, 48, pp. 111-116; Allen, R.G., Pereira, L.S., Raes, D., Smith, M., (1998) Crop evapotranspiration: Guidelines for computing crop water requirements, p. 300. , (Irrigation and Drainage Pa, Rome: FAO, r, v.56); Blore, T.W.D., Further studies o…	Pereira, A. R.; ESALQ/USP, Av Padua Dias 11, 13418-900 Piracicaba (SP), Brazil; email: arpereir@esalq.usp.br			68705			English; Portuguese	Bragantia	Article	Final	All Open Access, Gold, Green	Scopus	2-s2.0-84856777443
Santos L.M., Ferraz G.A.S., Diotto A.V., Barbosa B.D.S., Maciel D.T., Andrade M.T., Ferraz P.F.P., Rossi G.	57212211074;55322659100;24586686800;56814632200;57209292142;57212213909;56421977300;56244886400;	Coffee Crop Coefficient Prediction As A Function Of Biophysical Variables Identified From Rgb Uas Images	2020	Agronomy Research	18	Special Issue 2		1463	1471		2	10.15159/AR.20.100	https://www.scopus.com/inward/record.uri?eid=2-s2.0-85086318648&doi=10.15159%2fAR.20.100&partnerID=40&md5=ea8b71eb12a4ff3b808c6322e394f76d	federal university of lavras, brazil; Federal University of Lavras, brazil; University of Florence, Italy;	Santos, L.M., Federal University of Lavras, Department of Agricultural Engineering, University Campus, Lavras, MG BR37.200-000, Brazil; Ferraz, G.A.S., Federal University of Lavras, Department of Agricultural Engineering, University Campus, Lavras, MG BR37.200-000, Brazil; Diotto, A.V., Federal University of Lavras, Department of Water Resources and sanitation, University Campus, Lavras, BR37.200…	Coffea arabica L; Drone; Irrigation; Leaf area; Uav (unmanned aerial vehicle)		ACKNOWLEDGEMENTS. The authors thank, the Foundation for Research of the State of Minas Gerais (FAPEMIG), the National Council for Scientific and Technological Development (CNPq), the Coordination for the Improvement of Higher Education Personnel (CAPES), the Federal University of Lavras (UFLA) and University of Firenze (UniFI).			Allen, R.G., Pereira, L.S., Raes, D., Smith, M., (1998) Crop Evapotranspiration-Guidelines for Computing Crop Water Requirements, p. 1 50. , FAO, Rome; Anselin, L., Syabri, I., Kho, Y., GeoDa: An Introduction to Spatial Data Analysis (2006) Geographical Analysis, 38, p. 5 22; Arruda, F.B., Iaffe, A., Sakai, E., Calheiros, R.O., Annual results of coffee crop coefficient in a trial in Pindorama SP …	Santos, L.M.; Federal University of Lavras, Brazil; email: luanna_mendess@yahoo.com.br		Eesti Pollumajandusulikool	1406894X			English	Agron. Res.	Article	Final		Scopus	2-s2.0-85086318648
De Freitas Bezerra Marujo R., Moreira M.A., Lordelo Volpato M.M., Ramos Alves H.M.	57205656827;55999108900;55969532500;57194504179;	Coffee Crop Detection By Automatic Classification Using Spectral And Textural Attributes And Illumination Factor [Mapeamento Da Cultura Cafeeira Por Meio De Classicação Automática Utilizando Atributos Espectrais, Texturais E Fator De Iluminação]	2017	Coffee Science	12	2		17	28				https://www.scopus.com/inward/record.uri?eid=2-s2.0-85020431218&partnerID=40&md5=dfc11d1212be84a5b399836a63c9b900	Instituto Nacional de Pesquisas Espaciais, brazil ; Empresa de Pesquisa Agropecuária de Minas Gerais, brazil ;	de Freitas Bezerra Marujo, R., Instituto Nacional de Pesquisas Espaciais/INPE, Departamento de Sensoriamento Remoto/DSR, Cx. P. 515, São José dos Campos, SP, 12.201-970, Brazil; Moreira, M.A., Instituto Nacional de Pesquisas Espaciais/INPE, Departamento de Sensoriamento Remoto/DSR, Cx. P. 515, São José dos Campos, SP, 12.201-970, Brazil; Lordelo Volpato, M.M., Empresa de Pesquisa Agropecuária de …	Landsat-8; Remote sensing; SRTM		? Funda??o de Coordena??o de Aperfei?oamento de Pessoal de N?vel Superior (CAPES), pela bolsa concedida para o desenvolvimento desta pesquisa.			Adami, M., Fusão de imagens por IHS para melhorar a identificação de uso do solo em elementos amostrais (2007) Engenharia Agrícola, 27 (2), pp. 529-536. , Jaboticabal; Addin, E.A., Coillie, F.M.B.V., De Jong, S.M., Introduction to the GEOBIA 2010 special issue: From pixels to geographic objects in remote sensing image analysis (2012) International Journal of Applied Earth Observation and Geoinfor…			Editora UFLA	18096875			Portuguese	Coffee Sci.	Article	Final		Scopus	2-s2.0-85020431218
Da Rosa V.G.C., Moreira M.A., Rudorff B.F.T., Adami M.	36998488900;55999108900;6603575325;16047252500;	Coffee Crop Yield Estimate Using An Agrometeorological-Spectral Model [Estimativa Da Produtividade De Café Com Base Em Um Modelo Agrometeorologico-Espectral]	2010	Pesquisa Agropecuaria Brasileira	45	12		1478	1488		16	10.1590/S0100-204X2010001200020	https://www.scopus.com/inward/record.uri?eid=2-s2.0-79952095839&doi=10.1590%2fS0100-204X2010001200020&partnerID=40&md5=293ecbc4fc4cc4a7a60d1e21f1583ff1	Instituto Nacional de Pesquisas Espaciais, brazil ;	da Rosa, V.G.C., Instituto Nacional de Pesquisas Espaciais, Divisão de Sensoriamento Remoto, Avenida dos Astronautas no 1.758, CEP 12227-010 São José dos Campos SP, Brazil; Moreira, M.A., Instituto Nacional de Pesquisas Espaciais, Divisão de Sensoriamento Remoto, Avenida dos Astronautas no 1.758, CEP 12227-010 São José dos Campos SP, Brazil; Rudorff, B.F.T., Instituto Nacional de Pesquisas Espaci…	Agricultural statistics; Coffea; Leaf area index; Modeling; Remote sensing	Coffea				Berka, L.M.S., Rudorff, B.F.T., Shimabukuro, Y.E., Soybean yield estimation by an agrometeorological model in a GIS (2003) Scientia Agricola, 60, pp. 433-440; Câmara, G., Souza, R.C.M., Freitas, U.M., Garrido, J., SPRING: Integrating remote sensing and GIS by object-oriented data modelling (1996) Computers and Graphics, 20, pp. 395-403; de Camargo, Â., de Camargo, M.B.P., Definição e esquematizaç…	da Rosa, V.G.C.; Instituto Nacional de Pesquisas Espaciais, Avenida dos Astronautas, no 1.758, CEP 12227-010 São José dos Campos SP, Brazil; email: vivian@dsr.inpe.br			0100204X			Portuguese	Pesqui. Agropecu. Bras.	Article	Final	All Open Access, Gold, Green	Scopus	2-s2.0-79952095839
Pereira Coltri P., Zullo J., Ribeiro Do Valle Goncalves R., Romani L.A.S., Pinto H.S.	55303432300;6602127645;55746011700;35273115800;7006792253;	Coffee Crop'S Biomass And Carbon Stock Estimation With Usage Of High Resolution Satellites Images	2013	IEEE Journal of Selected Topics in Applied Earth Observations and Remote Sensing	6	3	6520004	1786	1795		21	10.1109/JSTARS.2013.2262767	https://www.scopus.com/inward/record.uri?eid=2-s2.0-84880267248&doi=10.1109%2fJSTARS.2013.2262767&partnerID=40&md5=2af285df3891dbc8d9cd0a5557a8044c	University of Campinas, brazil ; Embrapa Agriculture Informatics, brazil ;	Pereira Coltri, P., Center of Meteorological and Climate Researches Applied to Agriculture (CEPAGRI), University of Campinas (UNICAMP), CNPq, São Paulo, Brazil; Zullo, J., Center of Meteorological and Climate Researches Applied to Agriculture (CEPAGRI), University of Campinas (UNICAMP), CNPq, São Paulo, Brazil; Ribeiro Do Valle Goncalves, R., Center of Meteorological and Climate Researches Applie…	Biophysical properties measurement; coffee Arabica; GeoEye-1; vegetation index	Biophysical properties; Coffee arabica; Empirical correlations; Empirical relationships; GeoEye-1; High resolution image; High resolution satellites; Vegetation index; Carbon; Crops; Forestry; Remote sensing; Vegetation; Biomass; biomass; biophysics; coffee; GeoEye-1; remote sensing; satellite imagery; vegetation index				Zullo Jr., J., Pinto, H.S., Assad, E.D., Ávila, A.M.H., Potential for growing Arabica coffee in the extreme south of Brazil in a warmer world (2011) Climatic Change, 10, pp. 535-548. , Dordrecht, The Netherlands: Springer; Damatta, F.M., Ecophysiology of coffee growth and production (2007) Brazilian J. Plant Physiology, 19 (4), pp. 485-510; Assad, E.D., Pinto, H.S., Zullo Jr., J., Helminsk Avila,…	Center of Meteorological and Climate Researches Applied to Agriculture (CEPAGRI), , São Paulo, Brazil			19391404			English	IEEE J. Sel. Top. Appl. Earth Obs. Remote Sens.	Article	Final		Scopus	2-s2.0-84880267248
Wei P., Jiang T., Peng H., Jin H., Sun H., Chai D., Huang J.	57201323466;57224107586;57204516137;57191835868;56125901100;54790503500;56135550100;	Coffee Flower Identification Using Binarization Algorithm Based On Convolutional Neural Network For Digital Images	2020	Plant Phenomics	2020		6323965					10.34133/2020/6323965	https://www.scopus.com/inward/record.uri?eid=2-s2.0-85106979824&doi=10.34133%2f2020%2f6323965&partnerID=40&md5=ab23f289a82b3f39a91d762f04779825	Zhejiang University, China; Jiangsu Radio Scientific Institute Co. Ltd., China; Innovation Institute of Disaster Prevention and Reduction at Inner Mongolia, China; Zhejiang University, Hangzhou, China; University of California, United States;	Wei, P., Institute of Applied Remote Sensing and Information Technology, Zhejiang University, Hangzhou, 310058, China; Jiang, T., Institute of Applied Remote Sensing and Information Technology, Zhejiang University, Hangzhou, 310058, China; Peng, H., Institute of Applied Remote Sensing and Information Technology, Zhejiang University, Hangzhou, 310058, China; Jin, H., Jiangsu Radio Scientific Insti…			We thank the Jiangsu Province Radio Scientific Institute Co., Ltd. for providing the data used in this study. This work was supported by the National Science Foundation of China (41471277).			Ramos, P. J., Prieto, F., Montoya, E. C., Oliveros, C. E., Automatic fruit count on coffee branches using computer vision (2017) Computers and Electronics in Agriculture, 137, pp. 9-22; Herwitz, S. R., Johnson, L. F., Dunagan, S. E., Imaging from an unmanned aerial vehicle: agricultural surveillance and decision support (2004) Computers and Electronics in Agriculture, 44 (1), pp. 49-61; Liu, M. W…	Huang, J.; Institute of Applied Remote Sensing and Information Technology, China; email: hjf@zju.edu.cn		American Association for the Advancement of Science	26436515			English	Plant. Phenomic.	Article	Final	All Open Access, Gold, Green	Scopus	2-s2.0-85106979824
Silva S.A., De Queiroz D.M., Pinto F.A.C., Santos N.T.	25637770400;6602255317;7102739792;24463799400;	Coffee Quality And Its Relationship With Brix Degree And Colorimetric Information Of Coffee Cherries	2014	Precision Agriculture	15	5		543	554		11	10.1007/s11119-014-9352-y	https://www.scopus.com/inward/record.uri?eid=2-s2.0-84917743595&doi=10.1007%2fs11119-014-9352-y&partnerID=40&md5=d0bd314e69359cdcfacbf7cdc94217c6	State University Santa Cruz, Brazil; Federal University Viçosa, Brazil;	Silva, S.A., State University of Santa Cruz, Rod. Ilhéus-Itabuna, Ilhéus, BA, 45662-900, Brazil; de Queiroz, D.M., Viçosa Federal University, Av. Ph. Rolfs, Ilhéus, BA, 36570-000, Brazil; Pinto, F.A.C., Viçosa Federal University, Av. Ph. Rolfs, Ilhéus, BA, 36570-000, Brazil; Santos, N.T., Viçosa Federal University, Av. Ph. Rolfs, Ilhéus, BA, 36570-000, Brazil	Precision agriculture; Remote sensing; Sensors; Spectroradiometry					Alves, E.A., (2009) Variabilidade espacial e temporal da qualidade do café cereja produzido na região das Serras de Minas, , Doutorado em Engenharia Agrícola, Viçosa, Brasil: Federal University of de Viçosa; Angélico, C.L., Pimenta, C.J., Chalfoun, S.M., Chagas, S.J.R., Pereira, M.C., Chalfoun, Y., Diferentes estádios de maturação e tempos de ensacamento sobre a qualidade do café (2011) Coffee Sc…	Silva, S.A.; State University of Santa Cruz, Rod. Ilhéus-Itabuna, Brazil		Kluwer Academic Publishers	13852256		PREAF	English	Precis. Agric.	Article	Final		Scopus	2-s2.0-84917743595
De Oliveira R.B., Lima J.S.D.S., Xavier A.C., Passos R.R., De Silva S.A., Da Silva A.F.	15047730700;35105264900;12805120700;23111352800;25637770400;36247099300;	Comparison Between Soil Sampling Methods For Conilon Coffee Liming And Fertilization Recommendation [Comparação Entre Métodos De Amostragem Do Solo Para Recomendação De Calagem E Adubação Do Cafeeiro Conilon]	2008	Engenharia Agricola	28	1		176	186		17	10.1590/S0100-69162008000100018	https://www.scopus.com/inward/record.uri?eid=2-s2.0-43449133015&doi=10.1590%2fS0100-69162008000100018&partnerID=40&md5=384c38cca4adae7caffd55b68592489b	State University São Paulo, brazil ; Federal University of Espírito Santo, brazil ; Federal University of Espírito Santo, brazil ;	De Oliveira, R.B., UNESP, Botucatu - SP, Brazil; Lima, J.S.D.S., Departamento de Engenharia Rural, UFES, Alegre - ES, Brazil; Xavier, A.C., Departamento de Engenharia Rural, UFES, Alegre - ES, Brazil; Passos, R.R., Departamento de Produção Vegetal, UFES, Alegre - ES, Brazil; De Silva, S.A., Departamento de Engenharia Rural, UFES, Alegre - ES, Brazil; Da Silva, A.F., Departamento de Engenharia Rur…	Geoprocessing; Geostatistics; Soil management						De Oliveira, R. B.; UNESP, Botucatu - SP, Brazil; email: rbatista@fca.unesp.br			1006916			Portuguese	Eng. Agric.	Article	Final	All Open Access, Gold, Green	Scopus	2-s2.0-43449133015
Ferraz G.A.S., Da Silva F.M., De Oliveira M.S., Da Silva F.C., Carvalho L.C.C.	55322659100;55126474900;12804341400;55969247100;17134352200;	Comparison Between The Soil Chemical Atributes Sampled Conventionaly And In Grid [Comparativo Entre Os Atributos Químicos Do Solo Amostrados De Forma Convencional E Em Malha]	2017	Coffee Science	12	1		17	29		3	10.25186/cs.v12i1.1188	https://www.scopus.com/inward/record.uri?eid=2-s2.0-85016593734&doi=10.25186%2fcs.v12i1.1188&partnerID=40&md5=a94e5d70ca9c638ce67791e91ceef326	federal university of lavras, brazil; Federal University of Lavras, brazil; Federal University of Fluminense, brazil ; State University Santa Cruz, Brazil;	Ferraz, G.A.S., Federal University of de Lavras/ULFA, Departamento de Engenharia/DEG, Lavras, MG 37.200-000, Brazil; Da Silva, F.M., Federal University of de Lavras/ULFA, Departamento de Engenharia/DEG, Lavras, MG 37.200-000, Brazil; De Oliveira, M.S., Federal University of de Lavras/UFLA, Departamento de Ciências Exatas/DEX, Lavras, M G 37.200-000, Brazil; Da Silva, F.C., Federal University of F…	Coffee plant; Geostatistics; Management; Precision Agriculture					Alvarez, V.H., Interpretação dos resultados das análises de solos (1999) Recomendações Para O Uso De Corretivos E Fertilizantes Em Minas Gerais: 5A aproximação, pp. 25-32. , RIBEIRO, A. C.; GUIMARÃES, P. T. G.; ALVAREZ, V. H. (Ed.), Viçosa, MG: CFSEMG; Alves, M.C., Geostatistical analysis of the spatial variation of the berry borer and leaf miner in a coffee agroecosystem (2011) Precision Agricul…			Editora UFLA	18096875			Portuguese	Coffee Sci.	Article	Final		Scopus	2-s2.0-85016593734
Oré G., Alcântara M.S., Góes J.A., Oliveira L.P., Yepes J., Teruel B., Castro V., Bins L.S., Castro F., Luebeck D., Moreira L.F., Gabrielli L.H., Hernandez-Figueroa H.E.	57215291483;57202703855;57215281565;34267744300;57215415791;15766181700;57215281063;13105530800;57215292949;6505507512;57215277461;27867659700;7004578182;	Crop Growth Monitoring With Drone-Borne Dinsar	2020	Remote Sensing	12	4	615				8	10.3390/rs12040615	https://www.scopus.com/inward/record.uri?eid=2-s2.0-85080956615&doi=10.3390%2frs12040615&partnerID=40&md5=767852da24afa6fb139a172612e36402	University of Campinas, brazil ; University of Campinas, brazil ; National Institute for Space Research, brazil ; Radaz Indústria e Comércio de Produtos Eletrônicos Ltda., brazil ;	Oré, G., School of Electrical and Computer Engineering, University of Campinas-UNICAMP, Campinas, 13083-852, Brazil; Alcântara, M.S., School of Electrical and Computer Engineering, University of Campinas-UNICAMP, Campinas, 13083-852, Brazil; Góes, J.A., School of Electrical and Computer Engineering, University of Campinas-UNICAMP, Campinas, 13083-852, Brazil; Oliveira, L.P., School of Electrical …	Crop growth deficit map; Differential interferometry; DInSAR; Drone-borne radar; Precision agriculture	Crops; Interferometry; Optical sensors; Precision agriculture; Space-based radar; Sugar cane; Synthetic aperture radar; Weather satellites; Complementary tools; Crop growth; D-inSAR; Differential interferometry; Differential synthetic aperture radar interferometry (DInSAR); High resolution maps; Information sources; Spatial resolution; Drones	Funding: This research was funded by government agencies CAPES and CNPq and the São Paulo State agency FAPESP, under the contracts PITE 2017/19416-3 and PIPE 2018/00601-8.	This research was funded by government agencies CAPES and CNPq and the S?o Paulo State agency FAPESP, under the contracts PITE 2017/19416-3 and PIPE 2018/00601-8. We thank the teams of the schools of Electrical and Computer Engineering and of Agricultural Engineering of the University of Campinas, UNICAMP, for the given support.		Liu, C.-A., Chen, Z.-X., Shao, Y., Chen, J.-S., Hasi, T., Pan, H.-Z., Research advances of SAR remote sensing for agriculture applications: A review (2019) J. Integr. Agrie, 18, pp. 506-525. , [CrossRef]; Lin, H., Chen, J., Pei, Z., Zhang, S., Hu, X., Monitoring Sugarcane Growth Using ENVISAT ASAR Data (2009) IEEE Trans. Geosei. Remote Sens, 47, pp. 2572-2580. , [CrossRef]; Baghdadi, N., Cresson,…	Oliveira, L.P.; School of Electrical and Computer Engineering, Brazil; email: luciano@decom.fee.unicamp.br		MDPI AG	20724292			English	Remote Sens.	Article	Final	All Open Access, Gold, Green	Scopus	2-s2.0-85080956615
Valente D.S.M., De Queiroz D.M., De Carvalho Pinto F.A., Santos N.T., Santos F.L.	55081047300;6602255317;7102739792;24463799400;22951558100;	Definition Of Management Zones In Coffee Production Fields Based On Apparent Soil Electrical Conductivity	2012	Scientia Agricola	69	3		173	179		20	10.1590/S0103-90162012000300001	https://www.scopus.com/inward/record.uri?eid=2-s2.0-84858120514&doi=10.1590%2fS0103-90162012000300001&partnerID=40&md5=23fbf24119206b57c224d6dc4cc7cca4	Federal University of Viçosa, brazil ; Federal University of Viçosa, brazil ;	Valente, D.S.M., UFV, Depto. de Engenharia Agrícola, Av. P.H. Rolfs, s/n, Campus Universitário, 36570-000 - Viçosa, MG, Brazil; de Queiroz, D.M., UFV, Depto. de Engenharia Agrícola, Av. P.H. Rolfs, s/n, Campus Universitário, 36570-000 - Viçosa, MG, Brazil; de Carvalho Pinto, F.A., UFV, Depto. de Engenharia Agrícola, Av. P.H. Rolfs, s/n, Campus Universitário, 36570-000 - Viçosa, MG, Brazil; Santos…	Coffea Arabica L.; Fuzzy K-means; Geostatistics; Soil sensors	Coffea arabica				Corwin, D.L., Lesch, S.M., Characterizing soil spatial variability with apparent soil electrical conductivity. Part II. Case study (2005) Computer and Electronics in Agriculture, 46, pp. 135-152; Corwin, D.L., Lesch, S.M., Oster, J.D., Kaffka, S.R., Monitoring management-induced spatio-temporal changes in soil quality through soil sampling directed by apparent electrical conductivity (2006) Geode…	Valente, D. S. M.; UFV, Av. P.H. Rolfs, s/n, Campus Universitário, 36570-000 - Viçosa, MG, Brazil; email: valente@ufv.br		Scientia Agricola	1039016			English	Sci. Agric.	Article	Final	All Open Access, Gold, Green	Scopus	2-s2.0-84858120514
De Jesus Santos E.O., Pinto F.B., De Almeida Barbosa M., Gontijo I.	56113098400;55318197700;56766015100;23984882800;	Delimitation Of Management Zones For Macronutrients In Of Coffee Crop Conilon Intercropping With Rubber Trees [Delineamento De Zonas De Manejo Para Macronutrientes Emlavoura De Café Conilon Consorciada Com Seringueira]	2015	Coffee Science	10	3		309	319		1		https://www.scopus.com/inward/record.uri?eid=2-s2.0-84938697865&partnerID=40&md5=414a37f897a264c183fde635c0f89960	Federal University of Espírito Santo, brazil ; Federal University of Espírito Santo, brazil ;	de Jesus Santos, E.O., Federal University of do Espírito Santo/UFES, Centro Universitário Norte do Espírito Santo/CEUNES, Rodovia BR 101 Norte Km 60, Bairro Litoráneo, Sao Mateus, ES 29.932-540, Brazil; Pinto, F.B., Federal University of do Espírito Santo/UFES, Centro Universitário Norte do Espírito Santo/CEUNES, Rodovia BR 101 Norte Km 60, Bairro Litoráneo, Sao Mateus, ES 29.932-540, Brazil; de …	Coffea canephora; Geostatistics; Sample planning					(2012) Action 2.3: Estatcamp, , Action Development Core Team, Sao Carlos; Amado, T., Variabilidade espacial e temporal da produtividade de culturas sob sistema de plantio direto (2007) Pesquisa Agropecuária Brasileira, 42 (8), pp. 1101-1110. , Brasilia, ago; Bottega, E.L., Cokrigagem na estimativa dos teores de Ca e Mg em um Latossolo Vermelho distroférrico (2011) Revista Ciencia Agronómica, Fort…			Editora UFLA	18096875			Portuguese	Coffee Sci.	Article	Final		Scopus	2-s2.0-84938697865
Sanchez M.G.B., Marques Jr. J., Siqueira D.S., Camargo L.A., Pereira G.T.	55413370600;55336734000;35225259100;22933897800;7102631037;	Delineation Of Specific Management Areas For Coffee Cultivation Based On The Soil-Relief Relationship And Numerical Classification	2013	Precision Agriculture	14	2		201	214		8	10.1007/s11119-012-9288-z	https://www.scopus.com/inward/record.uri?eid=2-s2.0-84874709313&doi=10.1007%2fs11119-012-9288-z&partnerID=40&md5=c7bffcd67883fd1709b9e62aea38286b	State University São Paulo, brazil ; State University São Paulo, brazil ;	Sanchez, M.G.B., Dept. Solos e Adubos, Faculdade de Ciências Agrárias e Veterinárias, Unesp - Univ Estadual Paulista, Campus de Jaboticabal, Jaboticabal, SP, 14870-900, Brazil; Marques Jr., J., Dept. Solos e Adubos, Faculdade de Ciências Agrárias e Veterinárias, Unesp - Univ Estadual Paulista, Campus de Jaboticabal, Jaboticabal, SP, 14870-900, Brazil; Siqueira, D.S., Dept. Solos e Adubos, Faculda…	Drink quality; Multivariate analysis; Spatial variability	classification; clay; coffee; crop production; crop yield; cultivation; data interpretation; digital elevation model; food industry; geostatistics; iron; mapping; multivariate analysis; numerical method; physicochemical property; precision agriculture; principal component analysis; relief; soil property; spatial variation; Brazil; Minas Gerais				Alves, M.C.A., Silva, F.M., Moraes, J.C., Pozza, E.A., Oliveira, M.S., Souza, J.C.S., Geostatistical analysis of the spatial variation of the berry borer and leaf miner in a coffee agroecosystem (2011) Precision Agriculture, 12 (1), pp. 18-31; Assad, E.D., Pinto, H.S., Zullo Jr., J., Ávila, A.M.H., Impacto das mudanças climáticas no zoneamento agroclimático do café no Brasil (2004) Pesquisa Agrop…	Siqueira, D. S.; Dept. Solos e Adubos, Campus de Jaboticabal, Jaboticabal, SP, 14870-900, Brazil; email: diego_silvasiqueira@yahoo.com.br		Kluwer Academic Publishers	13852256		PREAF	English	Precis. Agric.	Article	Final		Scopus	2-s2.0-84874709313
Martins G.D., Galo M.D.L.B.T., Vieira B.S.	57002604900;57195519405;6602139558;	Detecting And Mapping Root-Knot Nematode Infection In Coffee Crop Using Remote Sensing Measurements	2017	IEEE Journal of Selected Topics in Applied Earth Observations and Remote Sensing	10	12	8016326	5395	5403		17	10.1109/JSTARS.2017.2737618	https://www.scopus.com/inward/record.uri?eid=2-s2.0-85028552774&doi=10.1109%2fJSTARS.2017.2737618&partnerID=40&md5=30aa6de56d377d34063debb939809868	State University São Paulo, brazil ; State University São Paulo, Federal University of Uberlândia, brazil ;	Martins, G.D., Graduate Program in Cartographic Science, São Paulo State University, Presidente Prudente, SP, 19060-900, Brazil; Galo, M.D.L.B.T., Department of Cartography, São Paulo State University, Presidente Prudente, SP, 19060-900, Brazil; Vieira, B.S., Institute of Agricultural Science, Federal University of Uberlândia, Monte Carmelo, MG, 38500-000, Brazil	Coffee plantation; disease detection; mapping; nematodes; precision agriculture; remote sensing; spectral characterization	Agriculture; Biophysics; Cultivation; Infrared devices; Mapping; Photomapping; Radiometry; Remote sensing; Soils; Spectrum analyzers; Vegetation; Area measurement; Coffee plantation; Disease detection; Indexes; nematodes; Precision Agriculture; Spectral characterization; Vegetation mapping; Plants (botany); coffee; mapping; nematode; plantation; precision agriculture; remote sensing; spectral res…				Barbosa, D.H., Souza, R.M., Vieira, H.D., Field assessment of coffee (Coffea arabica L.) cultivars in meloidogyne exigua-infested or free fields in Rio de Janeiro State, Brazil (2010) Crop Protection, 29 (2), pp. 175-177. , Feb; Barros, A.F., Root-knot nematodes, a growing problem for Conilon coffee in Espírito Santo State, Brazil (2014) Crop Protection, 55 (1), pp. 74-79. , Jan; Hillnhütter, C.,…	Martins, G.D.; Graduate Program in Cartographic Science, Brazil; email: deroco@ufu.br		Institute of Electrical and Electronics Engineers	19391404			English	IEEE J. Sel. Top. Appl. Earth Obs. Remote Sens.	Article	Final	All Open Access, Green	Scopus	2-s2.0-85028552774
Bazame H.C., Molin J.P., Althoff D., Martello M.	57203546109;7006923680;57203552230;57196399079;	Detection, Classification, And Mapping Of Coffee Fruits During Harvest With Computer Vision	2021	Computers and Electronics in Agriculture	183		106066					10.1016/j.compag.2021.106066	https://www.scopus.com/inward/record.uri?eid=2-s2.0-85102024513&doi=10.1016%2fj.compag.2021.106066&partnerID=40&md5=2d019ce905a292eb74bdf7a1b2eb6856	University of São Paulo, Brazil; Federal University of Viçosa, brazil ;	Bazame, H.C., Biosystems Engineering Department, Luiz de Queiroz College of Agriculture University of São Paulo (ESALQ/USP), Piracicaba, SP, Brazil; Molin, J.P., Biosystems Engineering Department, Luiz de Queiroz College of Agriculture University of São Paulo (ESALQ/USP), Piracicaba, SP, Brazil; Althoff, D., Agricultural Engineering Department, Federal University of Viçosa (UFV), Viçosa, MG, Braz…	Convolutional neural networks; Deep learning; Precision agriculture; YOLO	Computer vision; Deep neural networks; Harvesting; Iterative methods; Mapping; Object detection; Open systems; Precision agriculture; Coffee fruits; Convolutional neural network; Darknets; Deep learning; Fruit maturation; Geographic coordinates; Maturation stage; Precision Agriculture; Vision model; YOLO; Fruits; algorithm; coffee; computer vision; detection method; fruit; image classification; m…	To the Guima Café Group for the experimental area, Terrena Agronegócios for supporting research, and the Coordination for the Improvement of Higher Education Personnel (in Portuguese: Coordenação de Aperfeiçoamento de Pessoal de Nível Superior - CAPES) for granting the scholarship of authors 1 and 4 - Finance Code 001.			Avendano, J., Ramos, P.J., Prieto, F.A., A system for classifying vegetative structures on coffee branches based on videos recorded in the field by a mobile device (2017) Expert Syst. Appl., 88, pp. 178-192; Baluja, J., Tardaguila, J., Ayestaran, B., Diago, M.P., Spatial variability of grape composition in a Tempranillo (Vitis vinifera L.) vineyard over a 3-year survey (2013) Precis. Agric., 14, …	Bazame, H.C.; Biosystems Engineering Department, Brazil; email: helizanicouto@usp.br		Elsevier B.V.	1681699		CEAGE	English	Comput. Electron. Agric.	Article	Final		Scopus	2-s2.0-85102024513
Dos Santos L.M., Ferraz G.A.E.S., Barbosa B.D.D.S., Diotto A.V., Andrade M.T., Conti L., Rossi G.	57215592856;55322659100;56814632200;24586686800;57212213909;7102900889;56244886400;	Determining The Leaf Area Index And Percentage Of Area Covered By Coffee Crops Using Uav Rgb Images	2020	IEEE Journal of Selected Topics in Applied Earth Observations and Remote Sensing	13		9240961	6401	6409		1	10.1109/JSTARS.2020.3034193	https://www.scopus.com/inward/record.uri?eid=2-s2.0-85096899823&doi=10.1109%2fJSTARS.2020.3034193&partnerID=40&md5=83dfd211a01554a4b7932a574cba640b	federal university of lavras, brazil; Federal University of Lavras, brazil; Federal University of Lavras, brazil;	Dos Santos, L.M., Department of Agricultural Engineering, Federal University of Lavras, University Campus, Lavras, 37200-000, Brazil; Ferraz, G.A.E.S., Department of Agricultural Engineering, Federal University of Lavras, University Campus, Lavras, 37200-000, Brazil; Barbosa, B.D.D.S., Department of Agricultural Engineering, Federal University of Lavras, University Campus, Lavras, 37200-000, Braz…	Coffee; leaf area index (LAI); point cloud; structure from motion (SfM); unmanned aerial vehicle (UAV)	Antennas; Cameras; Crops; Image processing; Predictive analytics; Unmanned aerial vehicles (UAV); Coffee plantation; Conventional camera; Crop growth and yields; Plant measurement; Southeastern Brazil; Stereophotogrammetry; Structure from motion algorithm; Temporal and spatial; Plants (botany); aerial survey; algorithm; coffee; crop yield; image analysis; leaf area index; photogrammetry; plantati…	Manuscript received April 23, 2020; revised July 31, 2020; accepted October 19, 2020. Date of publication October 27, 2020; date of current version November 13, 2020. This work was supported by the Minas Gerais Research Foundation FAPEMIG under Grant APQ-01607-15. (Corresponding author: Luana Mendes dos Santos.) Luana Mendes dos Santos, Gabriel Araújo e Silva Ferraz, Brenon Dien-nevan de Souza Ba…			Watson, D.J., The physiological basis of variation in yield (1952) Adv. Agronomy, 4, pp. 101-144; Favarin, J.L., Dourado Neto, D., Nova, N.A.V., Favarin, M.D.G.G.V., Equations for estimating the coffee leaf area index (2002) Pesquisa Agropecuária Brasileira, 37, pp. 769-773. , in Portuguese; Fonseca, C.E.L., Condé, R.D.C.C., Leaf area estimation in seedlings of 'Mangaba' (Hancornia Speciosa Gom.)…	Dos Santos, L.M.; Department of Agricultural Engineering, Brazil; email: luanna_mendess@yahoo.com.br		Institute of Electrical and Electronics Engineers Inc.	19391404			English	IEEE J. Sel. Top. Appl. Earth Obs. Remote Sens.	Article	Final	All Open Access, Bronze	Scopus	2-s2.0-85096899823
Queiroz D.M., Sousa E.D.T.S., Lee W.S., Schueller J.K.	6602255317;57218990714;57201296889;7006154208;	Development And Testing Of A Low-Cost Portable Apparent Soil Electrical Conductivity Sensor Using A Beaglebone Black	2020	Applied Engineering in Agriculture	36	3		341	355		1	10.13031/aea.13439	https://www.scopus.com/inward/record.uri?eid=2-s2.0-85090973692&doi=10.13031%2faea.13439&partnerID=40&md5=4d96a20992209ae6b91aa781b322128a	Federal University of Vicosa, brazil ; University of Florida, United States; University of Florida, United States;	Queiroz, D.M., Department of Agricultural Engineering, Federal University of de Vicosa, Vicosa, MG, 36570-900, Brazil; Sousa, E.D.T.S., Department of Agricultural Engineering, Federal University of de Vicosa, Vicosa, MG, 36570-900, Brazil; Lee, W.S., Dept. of Agricultural and Biological Engineering, University of Florida, Gainesville, FL, United States; Schueller, J.K., Dept. of Mechanical and Ae…	Electrical conductivity; Geostatistics; Precision agriculture; Soil properties; Soil sensing; Spatial variability	Agricultural robots; Costs; Electric conductivity; Electric variables measurement; Global positioning system; Mapping; Soils; Textures; Touch screens; User interfaces; Apparent soil electrical conductivities; Development and testing; Electrical conductivity; Electrical resistivity methods; Global Navigation Satellite Systems; Minas Gerais , Brazil; Single board computers; Square wave signals; Soi…	The authors would like to thank the CNPq (The Brazilian National Counsel for Research and Development) and the CAPES (The Brazilian Coordination for the Improvement of Higher-Level Personnel) for their financial support of this work.			Adamchuk, V. I., Hummel, J. W., Morgan, M. T., Upadhyaya, S. K., On-the-go soil sensors for precision agriculture (2004) Comput. Electron. Agric, 44 (1), pp. 71-91. , https://doi.org/10.1016/j.compag.2004.03.002; Allred, B., Daniels, J. J., Ehsani, M. R., (2008) Handbook of agricultural geophysics, , https://doi.org/10.1201/9781420019353, Boca Raton, FL: CRC Press; Carroll, Z. L., Oliver, M. A., …	Queiroz, D.M.; Department of Agricultural Engineering, Brazil; email: queiroz@ufv.br		American Society of Agricultural and Biological Engineers	8838542		AEAGE	English	Appl Eng Agric	Article	Final		Scopus	2-s2.0-85090973692
Figueiredo V.C., Da Silva F.M., E Silva Ferraz G.A., De Oliveira M.S., Dos Santos S.A.	56009377100;55126474900;55322659100;12804341400;57204308315;	Development Of A Methodology To Determine The Best Grid Sampling In Precision Coffee Growing [Desenvolvimento De Uma Metodologia Para Determinação Da Melhor Malha Amostral Em Cafeicultura De Precisão]	2018	Coffee Science	13	3		312	323			10.25186/cs.v13i3.1445	https://www.scopus.com/inward/record.uri?eid=2-s2.0-85055145187&doi=10.25186%2fcs.v13i3.1445&partnerID=40&md5=e082f43736fdcfed7c77e12d42d21a46	Empresa de Pesquisa Agropecuária de Minas Gerais, brazil ; Federal University of Lavras, brazil; Federal University of Lavras, brazil;	Figueiredo, V.C., Empresa de Pesquisa Agropecuária de Minas Gerais/EPAMIG SUL, Campo Experimental de Três Pontas/CETP, Rodovia Três Pontas/Santana da Vargem,Km 06 Zona Rural, Três Pontas, MG Cx. P 91-37.190-000, Brazil; Da Silva, F.M., Federal University of de Lavras/UFLA, Departamento de Engenharia/DEG, Cx. P. 3037, Lavras, MG 37.200-000, Brazil; E Silva Ferraz, G.A., Federal University of de La…	Geostatistics; Grids; Precision agriculture; Soil fertility					Bachmaier, M., Backers, M., Variogram or semivariogram? Variance or semivariance? Allan variance or introducing a new term? Mathematical Geosciences (2011) Berlin, 43 (6), pp. 735-740. , Aug; Carvalho, L., (2016) Determinação Da Densidade Amostral ótima Para a geração De Mapas temáticos Na Cafeicultura De Precisão, , 230 p. Tese (Doutorado em Engenharia Agrícola) -Federal University of de Lavras,…			Editora UFLA	18096875			English	Coffee Sci.	Article	Final	All Open Access, Bronze, Green	Scopus	2-s2.0-85055145187
Katsuhama N., Imai M., Naruse N., Takahashi Y.	57207988456;55605542100;16231012700;57191076887;	Discrimination Of Areas Infected With Coffee Leaf Rust Using A Vegetation Index	2018	Remote Sensing Letters	9	12		1168	1194		6	10.1080/2150704X.2018.1519269	https://www.scopus.com/inward/record.uri?eid=2-s2.0-85063545571&doi=10.1080%2f2150704X.2018.1519269&partnerID=40&md5=f057575117ac3899cea3617f2f351157	Hokkaido University, Japan; Yokohama Science Frontier High School, Japan; Hokkaido University, Japan; Shiga University of Medical Science, Japan;	Katsuhama, N., Global Science Campus, Institute for the Advancement of Higher Education, Hokkaido University, Sapporo, Japan, Yokohama Science Frontier High School, Yokohama, Japan; Imai, M., Department of Earth and Planetary Sciences, Faculty of Science, Hokkaido University, Sapporo, Japan; Naruse, N., Department of Fundamental Biosciences, Shiga University of Medical Science, Otsu, Japan; Takah…		Remote sensing; Disease detection; Ground surveys; Ground truth; Monitoring methods; Normalized difference vegetation index; Satellite images; Standard deviation; Vegetation index; Vegetation; agroindustry; coffee; identification method; infectivity; NDVI; rust disease; satellite imagery; sustainability	This research was conducted in the Hokkaido University Super Scientist Program, which was funded by the Global Science Campus from Japan Science and Technology Agency.			Avelino, J., Cristancho, M., Georgiou, S., Imbach, P., Aguilar, L., Bornemann, G., Läderach, P., Morales, C., The Coffee Rust Crises in Colombia and Central America (2008-2013): Impacts, Plausible Causes and Proposed Solutions. (2015) Food Security, 7 (2), pp. 303-321; Avelino, J., Willocquet, L., Savary, S., Effects of Crop Management Patterns on Coffee Rust Epidemics. (2004) Plant Pathology, 53…	Naruse, N.; Department of Fundamental Biosciences, Japan; email: naruse@belle.shiga-med.ac.jp		Taylor and Francis Ltd.	2150704X			English	Remote Sens. Lett.	Article	Final		Scopus	2-s2.0-85063545571
Ferraz G.A.E.S., Da Silva F.M., Carvalho F.M., Da Costa P.A.N., Carvalho L.C.C.	55322659100;55126474900;24398635900;39761348000;17134352200;	Economic Viability Of The Variable Rate Technology Compared To The Traditional System Of Fertilization In A Coffee Field: A Case Study [Viabilidade Econômica Do Sistema De Adubação Diferenciado Comparado Ao Sistema De Adubação Convencional Em Lavoura Cafeeira: Um Estudo De Caso]	2011	Engenharia Agricola	31	5		906	915		13	10.1590/S0100-69162011000500008	https://www.scopus.com/inward/record.uri?eid=2-s2.0-84878413327&doi=10.1590%2fS0100-69162011000500008&partnerID=40&md5=3df990bf9fc2af96b043f9f96337ccad	Universidade Federal Rural do Rio de Janeiro, brazil ; Universidade Federal de Lavras, brazil ; Universidade Federal de Lavras, brazil ; Universidade Federal de Lavras, brazil ;	Ferraz, G.A.E.S., Instituto de Tecnologia, Departamento de Engenharia, UFRRJ, Seropédica - RJ, Brazil, PPGEA/UFLA, Lavras - MG, Brazil; da Silva, F.M., Departamento de Engenharia, UFLA, Lavras - MG, Brazil; Carvalho, F.M., Departamento de Administração e Economia, UFLA, Lavras - MG, Brazil; da Costa, P.A.N., Departamento de Engenharia, UFLA, Lavras - MG, Brazil; Carvalho, L.C.C., PPGEA/UFLA, Lavr…	Coffee; Conventional fertilization; Costs; Precision agriculture; Variable rates of fertilizer; Viability					Batte, M.T., Ehsani, M.R., The economics of precision guidance with auto-boom control for farmer-owned agricultural sprayers (2006) Computers and Electronics in Agriculture, 53 (1), pp. 28-44. , New York; Bliska, F.M.M., Vegro, C.L.R., Afonso Junior, P.C., Mourão, E.A.B., Cardoso, C.H.S., Custos de produção de café nas principais regiões produtoras do Brasil (2009) Informações Econômicas, 29 (8),…	Ferraz, G.A.E.S.; Instituto de Tecnologia, , Seropédica - RJ, Brazil; email: gabrielferraz@ufrrj.br			1006916			Portuguese	Eng. Agric.	Article	Final	All Open Access, Gold, Green	Scopus	2-s2.0-84878413327
Da Silva F.M., Alves M.C., Souza J.C.S., De Oliveira M.S.	16238082300;15047587400;57197444094;12804341400;	Effects Of Manual Harvesting On Coffee (Coffea Arabica L.) Crop Biannuality In Ijaci, Minas Gerais [Efeitos Da Colheita Manual Na Bienalidade Do Cafeeiro Em Ijaci, Minas Gerais]	2010	Ciencia e Agrotecnologia	34	3		625	632		23	10.1590/s1413-70542010000300014	https://www.scopus.com/inward/record.uri?eid=2-s2.0-77953481102&doi=10.1590%2fs1413-70542010000300014&partnerID=40&md5=28afde0be3e40f8a3d4e016dafbb0154	federal university of lavras, brazil; Federal University of Mato Grosso, brazil ; Federal University of Lavras, brazil; Federal University of Lavras, brazil;	da Silva, F.M., Federal University of de Lavras/UFLA, Departamento de Engenharia/DEG, Cx. P. 3037, 37200-000 - Lavras, MG, Brazil; Alves, M.C., Federal University of de Mato Grosso/UFMT, Departamento de Solos e Engenharia Rural, Cuiabá, MT, Brazil; Souza, J.C.S., Federal University of de Lavras/UFLA, Departamento de Engenharia/DEG, Lavras, MG, Brazil; de Oliveira, M.S., Federal University of de L…	Coffea arabica; Defoliation; Precision agriculture; Production	Coffea arabica				(2008) Anuário Da Agricultura Brasileira, p. 504. , AGRIANUAL, São Paulo: FNP; Balastreire, L.A., (2001) Agricultura De Precisão: Mapeamento Da Produtividade De Uma Cultura De Café, , In: CONGRESSO BRASILEIRO DE ENGENHARIA AGRÍCOLA, 30., 2001, Foz do Iguaçu. Anais... Jaboticabal: SBEA, CD-ROM; Bártholo, G.F., Guimarães, P.T.G., Cuidados na colheita e preparo do café (1997) Informe Agropecuário, 1…	da Silva, F. M.; Federal University of de Lavras/UFLA, Cx. P. 3037, 37200-000 - Lavras, MG, Brazil; email: famsilva@ufla.br		Federal University of Lavras	14137054			Portuguese	Ciencia e Agrotecnologia	Article	Final	All Open Access, Gold, Green	Scopus	2-s2.0-77953481102
Chemura A., Mutanga O., Odindi J.	55839089000;55912148400;36521256000;	Empirical Modeling Of Leaf Chlorophyll Content In Coffee (Coffea Arabica) Plantations With Sentinel-2 Msi Data: Effects Of Spectral Settings, Spatial Resolution, And Crop Canopy Cover	2017	IEEE Journal of Selected Topics in Applied Earth Observations and Remote Sensing	10	12	8047262	5541	5550		18	10.1109/JSTARS.2017.2750325	https://www.scopus.com/inward/record.uri?eid=2-s2.0-85030652299&doi=10.1109%2fJSTARS.2017.2750325&partnerID=40&md5=ea6aa49ef8ec12581b5b29c9a78e2901	Chinhoyi University of Technology, Zimbabwe; University of KwaZulu, South Africa	Chemura, A., Department of Environmental Science and Technology, Chinhoyi University of Technology, Chinhoyi, 7724, Zimbabwe; Mutanga, O., Department of Geography, School of Agricultural, Earth and Environmental Sciences, University of KwaZulu- Natal, Pietermaritzburg, 3209, South Africa; Odindi, J., Department of Geography, School of Agricultural, Earth and Environmental Sciences, University of …	Crop condition assessment; leaf chlorophyll; random forest (RF); spatial resolution; spectral resolution	Agriculture; Chlorophyll; Crops; Data structures; Decision making; Decision trees; Forecasting; Image resolution; Photomapping; Production; Remote sensing; Spectral resolution; Vegetation; Crop condition; Leaf chlorophyll; Random forests; Spatial resolution; Vegetation mapping; Coffee; assessment method; canopy; chlorophyll; coffee; leaf; modeling; plantation; prediction; Sentinel; spatial resolu…	Manuscript received April 19, 2017; revised July 11, 2017 and August 6, 2017; accepted September 4, 2017. Date of publication September 19, 2017; date of current version December 19, 2017. This work was supported by the International Foundation for Science under Grant D/5441. (Corresponding Author: Abel Chemura.) A. Chemura is with the Department of Environmental Science and Technology, Chinhoyi …			Nair, K.P.P., (2010) The Agronomy and Economy of Important Tree Crops of the Developing World, , New York, NY, USA: Elsevier; Sustainability of the coffee sector in Africa (2015) International Coffee Council, , London, U. K., Tech. Rep. ICC114-5 Ico; Jaramillo, J., Muchugu, E., Vega, F.E., Davis, A., Borgemesister, C., Some like it hot: The influence and implications of climate change on coffee b…	Chemura, A.; Department of Environmental Science and Technology, Zimbabwe; email: achemura@gmail.com		Institute of Electrical and Electronics Engineers	19391404			English	IEEE J. Sel. Top. Appl. Earth Obs. Remote Sens.	Article	Final		Scopus	2-s2.0-85030652299
Putra B.T.W., Soni P., Morimoto E., Pujiyanto P.	57193233025;9248907800;57197123487;57202358457;	Estimating Biophysical Properties Of Coffee (Coffea Canephora) Plants With Above-Canopy Field Measurements, Using Cropspec	2018	International Agrophysics	32	2		183	191		2	10.1515/intag-2017-0009	https://www.scopus.com/inward/record.uri?eid=2-s2.0-85048021288&doi=10.1515%2fintag-2017-0009&partnerID=40&md5=c8a7c4f5982b943d32d7b394414e8549	Jember University, Indonesia; , Tottori University, Japan; Indonesia; n Coffee and Cocoa Research Institute, Indonesia;	Putra, B.T.W., Agricultural Systems and Engineering, School of Environment, Resources and Development (SERD), Asian Institute of Technology, Pathum Thani, 12120, Thailand, Faculty of Agricultural Technology, Jember University, Jember, East Java, 68121, Indonesia; Soni, P., Agricultural Systems and Engineering, School of Environment, Resources and Development (SERD), Asian Institute of Technology,…	above-canopy measurement; chlorophyll content; Coffea canephora; CropSpec®; nitrogen content	biophysics; canopy; chlorophyll; coffee; estimation method; experimental study; light intensity; measurement method; nitrogen; nondestructive testing; remote sensing; vegetation index; Coffea canephora	*Corresponding author e-mail: soni.ait@gmail.com **The research was supported by the General Directorate of Higher Education (DIKTI-Indonesia), and the Asian Institute of Technology (Thailand). The authors would also like to acknowledge the support received from TOPCON JAPAN in providing the CropSpec® active nitrogen sensor, and the Indonesian Coffee and Cocoa Research Institute (ICCRI) for facil…			Athmaselvi, K.A., Jenney, P., Pavithra, C., Roy, I., Physical and biochemical properties of selected tropical fruits (2014) Int. Agrophys, 28, pp. 383-388; Barnes, E.M., Clarke, T.R., Richards, S.E., Colaizzi, P.D., Haberl, J., Kostrzewski, M., Waller, P., Moran, M.S., Coincident detection of crop water stress, nitrogen status and canopy density using ground based multispectral data (2000) Proc. …	Soni, P.; Agricultural Systems and Engineering, Thailand; email: soni.ait@gmail.com		Walter de Gruyter GmbH	2368722			English	Int. Agrophys.	Article	Final	All Open Access, Gold	Scopus	2-s2.0-85048021288
Ramirez G.M., Júnior J.Z.	14036050200;12804705800;	Estimation Of Biophysical Parameters Of Coffee Fields Based On High-Resolution Satellite Images [Estimativa De Parâmetros Biofísicos De Plantios De Café A Partir De Imagens Orbitais De Alta Resolução Espacial]	2010	Engenharia Agricola	30	3		468	479		12	10.1590/s0100-69162010000300011	https://www.scopus.com/inward/record.uri?eid=2-s2.0-77955397997&doi=10.1590%2fs0100-69162010000300011&partnerID=40&md5=5d64b714d756e591e7508396d3668217	federal university of lavras, brazil; University of Campinas, Brazil;	Ramirez, G.M., Federal University of de Lavras - UFLA, Caixa Postal 3037, Lavras - MG, Brazil; Júnior, J.Z., CEPAGRI Centro de Pesquisas Meteorológicas, Climáticas Aplicadas à Agricultura, UNICAMP, Campinas - SP, Brazil	Biomass; Height; LAI; Model; Quickbird					Alves, H.M.R., Lacerda, M.P.C., Caracterização de agroecossistemas cafeeiros nas principais regiões produtoras no Estado de Minas Gerais (2003) Anais..., pp. 11-17. , Simpósio Brasileiro de Sensoriamento Remoto, 2003, Belo Horizonte. Belo Horizonte: INPE; Bausch, W.C., Halvorson, A.D., Cipra, J., Quickbird satellite and ground-based multispectral data correlations with agronomic parameters of irr…	Ramirez, G.M.; Federal University of de Lavras - UFLA, Caixa Postal 3037, Lavras - MG, Brazil; email: glaucia_ramirez@deg.ufla.br		Sociedade Brasileira de Engenharia Agricola	1006916			Portuguese	Eng. Agric.	Article	Final	All Open Access, Gold, Green	Scopus	2-s2.0-77955397997
De Barros M.M., Volpato C.E.S., Silva F.C., Palma M.A.Z., Spagnolo R.T.	36174806000;16318164900;55969247100;36680598100;37114854100;	Evaluation Of A Variable Rate Fertilizer Application System Adapted To Coffee Crop [Avaliação De Um Sistema De Aplicação De Fertilizantes A Taxa Variável Adaptado À Cultura Cafeeira]	2015	Coffee Science	10	2		223	232		2		https://www.scopus.com/inward/record.uri?eid=2-s2.0-84930745545&partnerID=40&md5=6ff4fc2f95d6035ffa3fc34ca5ea84a3	Federal University of Rural do Rio de Janeiro, brazil ; Federal University of Lavras, brazil; Federal University of Fluminense, brazil ; Federal University of Fronteira do Sul, brazil ; Federal University of Pelotas, brazil ;	de Barros, M.M., Federal University of Rural do Rio de Janeiro, Departamento de Engenharia, Instituto de Tecnologia, Seropédica, RJ 23890-000, Brazil; Volpato, C.E.S., Federal University of de Lavras/UFLA, Departamento de Engenharia Agrícola/DEG, Cx P. 3037, Lavras, MG 37200-000, Brazil; Silva, F.C., Federal University of Fluminense/UFF, Departamento de Engenharia Agrícola e Meio Ambiente, Niteró…	Coffee tillage; Precision agriculture; Variable doses application					Baio, F.H.R., Molin, J.P., Leal, A.J.F., Avaliação comparativa da distribuição transversal de adubos sólidos aplicados em culturas anuais (2012) Bioscience Journal, 28 (4), pp. 527-536. , Uberlândia, jul./ago; Bonotto, J.B., Distribuição longitudinal de fertilizantes por dosadores de semeadoras adubadoras em linhas (2013) Revista Engenharia na Agricultura, 21 (4), pp. 368-387. , Viçosa, jul; Bott…			Editora UFLA	18096875			Portuguese	Coffee Sci.	Article	Final		Scopus	2-s2.0-84930745545
Dias T.L., Rodrigues A.P., Batista M.R.A., Vicente M.R., Dos Santos R.M.	57211711011;57211716117;57211715142;49965095600;57194005933;	Evapotranspiration And Crop Coefficient Of Coffee Plants From Orbital Sensors Images [Evapotranspiração E Coeficiente De Cultura Do Cafeeiro Irrigado A Partir De Imagens De Sensores Orbitais]	2019	IRRIGA	1	1InovagriSpecialEdition		31	37			10.15809/irriga.2019v1n1p31-37	https://www.scopus.com/inward/record.uri?eid=2-s2.0-85074878705&doi=10.15809%2firriga.2019v1n1p31-37&partnerID=40&md5=5cb687aca559807cdc7190d26e64e2ae	Instituto Federal do Norte de Minas Gerais, brazil ;	Dias, T.L., Instituto Federal do Norte de Minas Gerais, Campus Salinas, Fazenda Varginha Km 02 Rod. Salinas/Taiobeiras, Salinas, MG CEP:39560-000, Brazil; Rodrigues, A.P., Instituto Federal do Norte de Minas Gerais, Campus Salinas, Fazenda Varginha Km 02 Rod. Salinas/Taiobeiras, Salinas, MG CEP:39560-000, Brazil; Batista, M.R.A., Instituto Federal do Norte de Minas Gerais, Campus Salinas, Fazenda…	Sebal; Vegetation index; Water management	algorithm; coffee; evapotranspiration; irrigation system; Landsat; satellite imagery; vegetation index; water management; Bahia; Brazil				Allen, R.G., Pereira, L.S., Raes, D., Smith, M., Crop evapotranspiration: Guidelines for computing crop water requirements (1998) Roma: FAO, p. 300. , FAO – Irrigation and Drainage Paper56; Allen, R., Tasumi, M., Trezza, R., Satellite-based energy balance for mapping evapotranspiration with internalized calibration (METRIC)-Model (2007) Journal of Irrigation and Drainage Engineering, Reston, 133 …			Universidade Estadual Paulista - UNESP	14137895			Portuguese	Irriga	Article	Final	All Open Access, Gold	Scopus	2-s2.0-85074878705
Oliveira H.C., Guizilini V.C., Nunes I.P., Souza J.R.	57220704474;34880043500;57201590457;40662122400;	Failure Detection In Row Crops From Uav Images Using Morphological Operators	2018	IEEE Geoscience and Remote Sensing Letters	15	7		991	995		15	10.1109/LGRS.2018.2819944	https://www.scopus.com/inward/record.uri?eid=2-s2.0-85045309738&doi=10.1109%2fLGRS.2018.2819944&partnerID=40&md5=fa8986234267e100c1781b5974d0aeb0	University of Campinas, brazil ; University of Sydney, Austrália; Federal University of Uberlândia, brazil ;	Oliveira, H.C., School of Civil Engineering, Architecture and Urban Planning, University of Campinas, Campinas, 13083-889, Brazil; Guizilini, V.C., School of Information Technologies, University of Sydney, Sydney, NSW 2006, Australia; Nunes, I.P., Faculty of Computing, Federal University of Uberlândia, Uberlândia, 38408-100, Brazil; Souza, J.R., Faculty of Computing, Federal University of Uberlân…	Agriculture; morphological operators; unmanned aerial vehicle (UAV)	Agriculture; Antennas; Crops; Cultivation; Decision making; Diseases; Image processing; Mathematical morphology; Mathematical operators; Mathematical transformations; Sensors; Tools; Unmanned aerial vehicles (UAV); Aerial images; Empty space; Failure detection; High resolution; Morphological operator; Novel methodology; Planted areas; RGB images; Aircraft detection; agriculture; airborne sensing;…	Manuscript received October 3, 2017; revised January 26, 2018 and March 1, 2018; accepted March 19, 2018. Date of publication April 11, 2018; date of current version June 22, 2018. This work was supported in part by the University of Campinas, in part by the Federal University of Uberlândia, in part by CNPq under Grant 400699/2016-8, and in part by The University of Sydney. (Corresponding author:…	This work was supported in part by the University of Campinas, in part by the Federal University of Uberl?ndia, in part by CNPq under Grant 400699/2016-8, and in part by The University of Sydney.		Mussatto, S.I., Machado, E.M.S., Martins, S., Teixeira, J.A., Production, composition, and application of coffee and its industrial residues (2011) Food Bioprocess Technol., 4, pp. 661-672. , Jul; Zhang, C., Kovacs, J.M., The application of small unmanned aerial systems for precision agriculture: A review (2012) Precis. Agricult., 13 (6), pp. 693-712. , Dec; Zheng, L.-Y., Xu, J.-X., Multi-crop-ro…	Oliveira, H.C.; School of Civil Engineering, Brazil; email: oliveira@fec.unicamp.br		Institute of Electrical and Electronics Engineers Inc.	1545598X			English	IEEE Geosci. Remote Sens. Lett.	Article	Final		Scopus	2-s2.0-85045309738
Johnson L.F., Herwitz S.R., Lobitz B.M., Dunagan S.E.	7404800168;7004261649;6603428678;6603133611;	Feasibility Of Monitoring Coffee Field Ripeness With Airborne Multispectral Imagery	2004	Applied Engineering in Agriculture	20	6		845	849		32		https://www.scopus.com/inward/record.uri?eid=2-s2.0-14644435774&partnerID=40&md5=39cbeb1c4a280e0fb683e6dfb2ef4f7e	California State University, United States; NASA Ames Research Center, United States; Clark University, United States; NASA Research Park, United States; University St. San Jose, NASA Ames Research Center, United States;	Johnson, L.F., Div. of Science/Environmental Policy, California State Univ. Monterey Bay, Monterey, CA, United States, Earth Science Division, NASA Ames Research Center, Moffett Field, CA 94035-1000, United States; Herwitz, S.R., Graduate School of Geography, Clark University, Worcester, MA, United States, UAV Applications Center, NASA Research Park, Moffett Field, CA, United States; Lobitz, B.M.…	Coffee; Harvest planning; Multi-spectral image processing; Remote sensing; Ripeness evaluation; UAV	Crops; Harvesting; Image segmentation; Multispectral scanners; Remote sensing; Unmanned vehicles; Coffee plantation; Harvest planning; Ripeness evaluation; Agricultural products				Adams, M.L., Philpot, W.D., Norvell, W.A., Yellowness index: An application of spectral second derivatives to estimate chlorosis of leaves in stressed vegetation (1999) Int'l J. Remote Sensing, 20 (18), pp. 3663-3675; Baret, F., Champion, I., Guyot, G., Podaire, A., Monitoring wheat canopies with a high spectral resolution radiometer (1987) Remote Sensing of Environment, 22 (3), pp. 367-378; Cann…	Johnson, L.F.; NASA Ames Research Center, Moffett Field, CA 94035-1000, United States; email: Ljohnson@mail.arc.nasa.gov			8838542		AEAGE	English	Appl Eng Agric	Article	Final		Scopus	2-s2.0-14644435774
Da Fonseca A.S., Lima J.S.S., Silva S.A., Dardengo M.C.J.D., Xavier A.C.	56896903800;35105264900;25637770400;17434034400;12805120700;	Fuzzy Logic In The Spatial And Temporal Distribution In The Qualitya Of The Beverage In Conilon Coffee [Lógica Fuzzy Na Distribuição Espacial E Temporal Na Qualidade Da Bebida De Café Conilon]	2019	Coffee Science	14	2		163	172		2	10.25186/cs.v14i2.1563	https://www.scopus.com/inward/record.uri?eid=2-s2.0-85069678441&doi=10.25186%2fcs.v14i2.1563&partnerID=40&md5=bcc4edfea64b94fe44eecac75665420e	Mepes Escola Família Agrícola de Ibitirama, brazil ; Federal University of Espírito Santo, brazil ; Instituto Federal do Espírito Santo, brazil ;	da Fonseca, A.S., Mepes Escola Família Agrícola de Ibitirama, Comunidade São Jose do Caparaó, S/N-29.540-000, Ibitirama, ES, Brazil; Lima, J.S.S., Federal University of do Espírito Santo / UFES, Departamento de Engenharia, Rural-Cx P. 16-29.500-000, Alegre, ES, Brazil; Silva, S.A., Federal University of do Espírito Santo / UFES, Departamento de Engenharia, Rural-Cx P. 16-29.500-000, Alegre, ES, B…	Coffea canephora; Cup-tasting; Quality coffee; Sensory analysis		The authors wish to thank CNPq and FAPES for the financial resources made available to carry			Alves, B.H.P., Análise Química do Aroma e da Bebida de Cafés de Minas Gerais e Espírito Santo em Diferentes Graus de torra.Tese (2012) Federal University of De Uberlândia, 162f, p. 2012; Angélico, C.L., Diferentes estádios de maturação e tempos de ensacamento sobre a qualidade do café (2011) Coffee Science, 6 (1), pp. 8-19; Cambardella, C.A., Fiel-Scale Variability of soil properties in Central I…			Editora UFLA	18096875			English	Coffee Sci.	Article	Final	All Open Access, Bronze, Green	Scopus	2-s2.0-85069678441
Silva S.A., Lima J.S.S.	25637770400;35105264900;	Fuzzy Logic To Map Of Variables Indicative Of Soil Fertility [Lógica Fuzzy No Mapeamento De Variáveis Indicadoras De Fertilidade Do Solo]	2009	Idesia	27	3		41	46		6		https://www.scopus.com/inward/record.uri?eid=2-s2.0-74949114428&partnerID=40&md5=b8a8be016a18d1293eb03eaf3f25b63f	Federal University of Espírito Santo, brazil ; Federal University of Espírito Santo, brazil ;	Silva, S.A., Centro de Ciencias Agrarias, Federal University of do Espirito Santo (UFES), Depto de Engenharia Rural, Caixa Postal 16, CEP 29500-000, Alegre-ES, Brazil; Lima, J.S.S., Depto de Engenharia Rural, Centro de Ciencias Agrarias, Federal University of do Espirito Santo (UFES), Brazil	Fuzzy sets; Geostatistcs; Soil fertility					Bönisch, S., Lopes Assad, M.L., Câmara, G., Monteiro, A.M.V., Representação e propagação de incertezas em dados de solos, 1- Atributos categóricos (2004) Revista Brasileira De Ciências Do Solo, 28, pp. 21-32. , Viçosa-MG; Burrough, P.A., McDonnell, R.A., (1998) Principles of Geographic Information Systems, p. 333. , New York, Oxford University Press; (1999) Empresa Brasileira De Pesquisa Agropecu…	Silva, S. A.; Centro de Ciencias Agrarias, Caixa Postal 16, CEP 29500-000, Alegre-ES, Brazil; email: samuel-assis@hotmail.com			734675			Portuguese	Idesia	Article	Final		Scopus	2-s2.0-74949114428
Araújo E Silva Ferraz G., Da Silva F.M., De Carvalho Alves M., De Lima Bueno R., Da Costa P.A.N.	55322659100;16238082300;15047587400;39761205400;39761348000;	Geostatistical Analysis Of Fruit Yield And Detachment Force In Coffee	2012	Precision Agriculture	13	1		76	89		33	10.1007/s11119-011-9223-8	https://www.scopus.com/inward/record.uri?eid=2-s2.0-84856231115&doi=10.1007%2fs11119-011-9223-8&partnerID=40&md5=07232b2196dacb494bef376886cefa4f	federal university of lavras, brazil; Federal University of Mato Grosso, brazil ;	Araújo e Silva Ferraz, G., Department of Engineering, Federal University of Lavras (UFLA), PO Box 3037, Lavras, MG 37200-000, Brazil; da Silva, F.M., Department of Engineering, Federal University of Lavras (UFLA), PO Box 3037, Lavras, MG 37200-000, Brazil; de Carvalho Alves, M., Department of Soil and Rural Engineering (DSER), Faculty of Agronomy and Veterinary Medicine (FAMEV), Federal Universit…	Coffee; Detachment force; Geostatistics; Precision agriculture; Yield	agricultural worker; coffee; crop yield; data set; fruit; geostatistics; harvesting; kriging; magnitude; manure; numerical model; precision agriculture; spatial variation; variogram; Brazil; Minas Gerais	Acknowledgments This research was supported by grants from Conselho Nacional de Desenvolvimento Científico e Tecnológico (CNPq). We would like to acknowledge, the two referees and Professor Margaret Oliver for the precious comments and suggestions.			Alves, M.C., Silva, F.M., Moraes, J.C., Pozza, E.A., Oliveira, M.S., Geostatistical analysis of the spatial variation of the berry borer and leaf miner in a coffee agroecosystem (2011) Precision Agriculture, 12, pp. 18-31; Alves, M.C., Silva, F.M., Pozza, E.A., Oliveira, M.S., Modeling spatial variability and pattern of rust and brown eye spot in coffee agroecosystem (2008) Journal of Pest Scienc…	de Carvalho Alves, M.; Department of Soil and Rural Engineering (DSER), Av. Fernando Correa da Costa 2367, Boa Esperança, Cuiabá, MT 78060-900, Brazil; email: mdecalves@ufmt.br			13852256		PREAF	English	Precis. Agric.	Article	Final		Scopus	2-s2.0-84856231115
Mora A., Beer J.	8399176500;7201990791;	Geostatistical Modeling Of The Spatial Variability Of Coffee Fine Roots Under Erythrina Shade Trees And Contrasting Soil Management	2013	Agroforestry Systems	87	2		365	376		11	10.1007/s10457-012-9557-x	https://www.scopus.com/inward/record.uri?eid=2-s2.0-84874946693&doi=10.1007%2fs10457-012-9557-x&partnerID=40&md5=e5992032b64620eb8a79d2d4de60e114	Universidad de Los Andes, Venezuela; Centro Agronómico Tropical de Investigación y Enseñanza, Costa Rica;	Mora, A., Instituto de Investigaciones para el Desarrollo Forestal (INDEFOR), Facultad de Ciencias Forestales y Ambientales, Universidad de Los Andes, Conjunto Forestal vía Chorros de Milla, Merida, Estado Merida, Venezuela; Beer, J., Centro Agronómico Tropical de Investigación y Enseñanza (CATIE), Turrialba, Costa Rica	Acid soils; Coffea arabica; Fine root length density; Organic management; Spatial correlation	acid soil; coffee; fertilizer application; fine root; geostatistics; numerical model; soil chemistry; soil fertility; soil management; soil nutrient; soil organic matter; spatial variation; topsoil; Coffea arabica; Erythrina poeppigiana				Aguirre, V., (1971) Estudio De Los Suelos Del área Del Centro Tropical De Enseñanza E Investigación. Tesis Magíster Scientiarum, , Turrialb: IICA; Babin, R., ten Hoopen, G.M., Cillas, C., Impact of shade on the spatial distribution of Sahlbergella singularis in traditional cocoa agroforests (2010) Agric For Entomol, 12, pp. 69-79; Cabalceta, G., D'Ambrosio, A., Bornemisza, E., Evaluacion de cobre…	Mora, A.; Instituto de Investigaciones para el Desarrollo Forestal (INDEFOR), Conjunto Forestal vía Chorros de Milla, Merida, Estado Merida, Venezuela; email: amora@ula.ve			1674366		AGSYE	English	Agrofor. Syst.	Article	Final		Scopus	2-s2.0-84874946693
Herwitz S.R., Johnson L.F., Dunagan S.E., Higgins R.G., Sullivan D.V., Zheng J., Lobitz B.M., Leung J.G., Gallmeyer B.A., Aoyagi M., Slye R.E., Brass J.A.	7004261649;7404800168;6603133611;7202548006;7402474229;7403975118;6603428678;55108135100;7801345538;36765844800;6602610062;7003834967;	Imaging From An Unmanned Aerial Vehicle: Agricultural Surveillance And Decision Support	2004	Computers and Electronics in Agriculture	44	1		49	61		277	10.1016/j.compag.2004.02.006	https://www.scopus.com/inward/record.uri?eid=2-s2.0-2942709985&doi=10.1016%2fj.compag.2004.02.006&partnerID=40&md5=e6602b71236b99ba146e31bb43abd40f	Clark University, United States; NASA Research Park, United States; California State University, United States; NASA Ames Research Center, United States; NASA Dryden Flight Research Center, United States; NASA Ames Research Center, United States;	Herwitz, S.R., Graduate School of Geography, Clark University, Worcester, MA 01610, United States, UAV Applications Center, NASA Research Park, Moffett Field, CA 94035, United States, Ecosystem Sci. and Technology Branch, NASA Ames Research Center, Mail Stop 242-4, Moffett Field, CA 94035, United States; Johnson, L.F., Earth Systems Science and Policy, California State University, Monterey Bay, M…	Coffee; Fertigation; Local area network; Multispectral imaging; Pathfinder-Plus UAV; Ripeness monitoring; Unmanned aerial vehicle; Weed mapping	Clouds; Color image processing; Data reduction; Decision support systems; Forestry; Image analysis; Imaging systems; Imaging techniques; Irrigation; Transponders; Unmanned vehicles; Kauai coffee company (CO); Plantations; Agriculture; crop production; decision support system; multispectral image; precision agriculture; remote sensing; Hawaii [(ISL) Hawaiian Islands]; Hawaii [United States]; Hawai…	The project was sponsored by NASA’s Suborbital Science Office, UAV Science Demonstrator Program. Additional support was provided by NASA’s Scientific Data Purchase Program. Deborah Parker (Clark University) and John Arvesen (Kauai Airborne Sciences) provided technical support. AeroVironment, Inc. (Simi Valley, Calif.) maintained and operated the UAV, and cooperated with payload physical and elect…			Allen, J.C., Kopp, D.D., Brewster, C.C., Fleischer, S.J., 2011: An agricultural odyssey (1999) American Entomologist, 45 (2), pp. 96-104; Bittenbender, H.C., Smith, V.E., (1999) Growing Coffee in Hawaii, , College of Tropical Agriculture and Human Resources, University of Hawaii; Cannell, M.G.R., Crop physiological aspects of coffee bean yields: A review (1975) Journal of Coffee Research, 5, pp. …	Herwitz, S.R.; Ecosystem Sci. and Technology Branch, , Moffett Field, CA 94035, United States; email: sherwitz@mail.arc.nasa.gov			1681699		CEAGE	English	Comput. Electron. Agric.	Article	Final		Scopus	2-s2.0-2942709985
Maciel D.A., Silva V.A., Ramos Alves H.M., Lordelo Volpato M.M., De Barbosa J.P.R.A., De Souza V.C.O., Santos M.O., De Oliveira Silveira H.R., Dantas M.F., De Freitas A.F., Carvalho G.R., Dos Santos J.O.	57190374434;36133914500;57194504179;55969532500;57215720156;38061354100;56378878400;37072175500;57190258055;56765424100;24372484100;57203483100;	Leaf Water Potential Of Coffee Estimated By Landsat-8 Images	2020	PLoS ONE	15	3	e0230013				1	10.1371/journal.pone.0230013	https://www.scopus.com/inward/record.uri?eid=2-s2.0-85081746691&doi=10.1371%2fjournal.pone.0230013&partnerID=40&md5=530cb3b737a24feb703793a3aaed2ab5	Instituto Nacional de Pesquisas Espaciais, brazil ; Empresa de Pesquisa Agropecuária de Minas Gerais, brazil ; Empresa Brasileira de Pesquisa Agropecuária, brazil ; Federal University of Lavras, brazil; Federal University of Itajubá, brazil ;	Maciel, D.A., Pós-Graduação/Sensoriamento Remoto, Instituto Nacional de Pesquisas Espaciais, São José dos Campos, SP, Brazil; Silva, V.A., Empresa de Pesquisa Agropecuária de Minas Gerais, Lavras, MG, Brazil; Ramos Alves, H.M., Empresa Brasileira de Pesquisa Agropecuária, Brasília, DF, Brazil; Lordelo Volpato, M.M., Empresa de Pesquisa Agropecuária de Minas Gerais, Lavras, MG, Brazil; de Barbosa,…		algorithm; Article; Brazil; Coffea arabica; controlled study; cost control; drought; leaf water potential; planting time; remote sensing; satellite imagery; vegetation				Lu, J., Carbone, G.J., Gao, P., Mapping the agricultural drought based on the long-term AVHRR NDVI and North American Regional Reanalysis (NARR) in the United States, 1981–2013 (2019) Appl Geogr, 104, pp. 10-20. , https://doi.org/10.1016/j.apgeog.2019.01.005; Mbatha, N., Xulu, S., Time series analysis of MODIS-derived NDVI for the Hluhluwe-Imfolozi Park, South Africa: Impact of recent intense dro…	Lordelo Volpato, M.M.; Empresa de Pesquisa Agropecuária de Minas GeraisBrazil; email: margarete@epamig.ufla.br		Public Library of Science	19326203		POLNC	English	PLoS ONE	Article	Final	All Open Access, Gold, Green	Scopus	2-s2.0-85081746691
Chemura A., Mutanga O., Sibanda M., Chidoko P.	55839089000;55912148400;39561458700;55839921700;	Machine Learning Prediction Of Coffee Rust Severity On Leaves Using Spectroradiometer Data	2018	Tropical Plant Pathology	43	2		117	127		7	10.1007/s40858-017-0187-8	https://www.scopus.com/inward/record.uri?eid=2-s2.0-85045038412&doi=10.1007%2fs40858-017-0187-8&partnerID=40&md5=79ac578a0f5c3031690e99095e7764b5	University of KwaZulu-Natal, South Africa; Chinhoyi University of Technology, Zimbabwe; Coffee Research Institute, Zimbabwe;	Chemura, A., School of Agricultural, Earth & Environmental Sciences, Geography Department, University of KwaZulu-Natal, P/Bag X01, Scottsville, Pietermaritzburg, 3209, South Africa, Environmental Science & Technology Dept., Chinhoyi University of Technology, P.Bag, Chinhoyi, 7724, Zimbabwe; Mutanga, O., School of Agricultural, Earth & Environmental Sciences, Geography Department, University of Kw…	Coffee rust; Hemileia vastatrix; Machine learning; Multispectral imaging		Acknowledgements We are very grateful to the Coffee Research Institute for providing facilities and staff to support this research. This research was also partly funded by IFS grant D/5441. We are also thankful to anonymous reviewers whose comments improved this paper.	We are very grateful to the Coffee Research Institute for providing facilities and staff to support this research. This research was also partly funded by IFS grant D/5441. We are also thankful to anonymous reviewers whose comments improved this paper.		Atzberger, C., Guerif, M., Baret, F., Werner, W., Comparative assessment of three chemometric techniques for the spectroradiometric assessment of canopy chlorophyll content in winter wheat (2010) Computers and Electronics in Agriculture, 73, pp. 165-173; Avelino, J., Willocquet, L., Savary, S., Effects of crop management patterns on coffee rust epidemics (2004) Plant Pathology, 53, pp. 541-547; B…	Chemura, A.; Environmental Science & Technology Dept., P.Bag, Zimbabwe; email: achemura@gmail.com		Springer International Publishing	19825676			English	Trop. Plant Pathol	Article	Final	All Open Access, Bronze	Scopus	2-s2.0-85045038412
Jacintho J.L., Ferraz G.A.E.S., Da Silva F.M., Santos S.A.	57193326783;55322659100;55126474900;57193324700;	Management Zones In Coffee Cultivation [Definição De Zonas De Manejo Para Cafeicultura]	2017	Revista Brasileira de Engenharia Agricola e Ambiental	21	2		94	99		2	10.1590/1807-1929/agriambi.v21n2p94-99	https://www.scopus.com/inward/record.uri?eid=2-s2.0-85012971957&doi=10.1590%2f1807-1929%2fagriambi.v21n2p94-99&partnerID=40&md5=6e0058405fe5ee570b464247a5a4b89f	Instituto Federal do Norte de Minas Gerais, brazil ; Federal University of Lavras, brazil;	Jacintho, J.L., Instituto Federal do Norte de Minas Gerais, Campus Araçuaí, Araçuaí, MG, Brazil; Ferraz, G.A.E.S., Federal University of de Lavras, Departamento de Engenharia, Lavras, MG, Brazil; Da Silva, F.M., Federal University of de Lavras, Departamento de Engenharia, Lavras, MG, Brazil; Santos, S.A., Federal University of de Lavras, Departamento de Engenharia, Lavras, MG, Brazil	Coffea arabica L.; Precision agriculture; Thematic mapping; Yield					Alves, M.C., Silva, F.M., Moraes, J.C., Pozza, E.A., Oliveira, M.S., Souza, J.C.S., Alves, L.S., Geostatistical analysis of the spatial variation of the berry borer and leaf miner in a coffee agroecosystem (2011) Precision Agriculture, 12, pp. 18-31. , https://doi.org/10.1007/s11119-009-9151-z; Bazzi, C.L., (2011) Software Para definição E avaliação De Unidades De Manejo Em Agricultura De precisã…	Jacintho, J.L.; Instituto Federal do Norte de Minas Gerais, Brazil; email: joao.jacintho@ifnmg.edu.br		Departamento de Engenharia Agricola - UFCG/Cnpq	14154366			English	Rev. Bras. Eng. Agric. Ambient.	Article	Final	All Open Access, Gold	Scopus	2-s2.0-85012971957
Kawakubo F.S., Pérez Machado R.P.	25521709700;56919693100;	Mapping Coffee Crops In Southeastern Brazil Using Spectral Mixture Analysis And Data Mining Classification	2016	International Journal of Remote Sensing	37	14		3414	3436		4	10.1080/01431161.2016.1201226	https://www.scopus.com/inward/record.uri?eid=2-s2.0-84982987970&doi=10.1080%2f01431161.2016.1201226&partnerID=40&md5=63febd4198f3fab56518929f3f7e5f9f	University of São Paulo, Brazil;	Kawakubo, F.S., Laboratory of Remote Sensing, Department of Geography, University of São Paulo, São Paulo, Brazil; Pérez Machado, R.P., Laboratory of Remote Sensing, Department of Geography, University of São Paulo, São Paulo, Brazil		Classification (of information); Crops; Cultivation; Decision trees; Image enhancement; Land use; Maximum likelihood; Mixtures; Photomapping; Remote sensing; Satellite imagery; Classification errors; Classification performance; Land use and land cover; Maximum-likelihood classification; Multi-spectral imagery; Spectral mixture analysis; Spectral reflectances; Spectral variability; Data mining; co…				Adami, M., Moreira, M.A., Barros, M.A., Martins, V.A., Rudorff, B.F.T., Avaliação da Exatidão do Mapeamento da Cultura do Café no Estado de Minas Gerais (2009) Proceedings of the 14th Brazilian Symposium on Remote Sensing, , Natal: Instituto Nacional de Pesquisas Espaciais; Adams, J.B., Gillespie, A.R., (2006) Remote Sensing of Landscape with Spectral Images: A Physical Modelling Approach, , New …	Kawakubo, F.S.; Laboratory of Remote Sensing, Avenida Professor Lineu Prestes, 338, Brazil; email: fsk@usp.br		Taylor and Francis Ltd.	1431161		IJSED	English	Int. J. Remote Sens.	Article	Final		Scopus	2-s2.0-84982987970
Chemura A., Mutanga O., Odindi J., Kutywayo D.	55839089000;55912148400;36521256000;15136487900;	Mapping Spatial Variability Of Foliar Nitrogen In Coffee (Coffea Arabica L.) Plantations With Multispectral Sentinel-2 Msi Data	2018	ISPRS Journal of Photogrammetry and Remote Sensing	138			1	11		28	10.1016/j.isprsjprs.2018.02.004	https://www.scopus.com/inward/record.uri?eid=2-s2.0-85041713400&doi=10.1016%2fj.isprsjprs.2018.02.004&partnerID=40&md5=d0c0958e1dc844a0465a0e5509d08d52	Chinhoyi University of Technology, Zimbabwe; University of KwaZulu-Natal, South Africa; Agricultural Research Centre, Zimbabwe;	Chemura, A., Environmental Science and Technology Department, Chinhoyi University of Technology, P. Bag 7724, Chinhoyi, Zimbabwe; Mutanga, O., University of KwaZulu-Natal, School of Agricultural, Earth & Environmental Sciences, P/Bag X01, Scottsville, Pietermaritzburg, 3209, South Africa; Odindi, J., University of KwaZulu-Natal, School of Agricultural, Earth & Environmental Sciences, P/Bag X01, S…	Canopy nitrogen; Nutrient management; Precision agriculture; Random forest	Coffee; Decision trees; Environmental impact; Nitrogen; Remote sensing; Vegetation; Empirical estimations; Normalized difference indices; Normalized differences; Nutrient management; Precision Agriculture; Random forests; Spatial variability; Spatially explicit; Forestry; agricultural management; coffee; crop yield; landscape ecology; limiting factor; mapping method; NDVI; nitrogen; plantation; p…	We are grateful to the managers of the large plantations for permission to sample their fields. This research was partly funded by International Foundation for Science (IFS), grant D/5441 .	We are grateful to the managers of the large plantations for permission to sample their fields. This research was partly funded by International Foundation for Science (IFS), grant D/5441.		Adelabu, S., Mutanga, O., Adam, E., Cho, M.A., Exploiting machine learning algorithms for tree species classification in a semiarid woodland using RapidEye image (2013) Int. J. Appl. Remote Sens., 7, pp. 0734801-07348013; Baker, P., Bentley, J., Charveriat, C., Dugne, H., Leftoy, T., Munyua, H., The coffee smallholder (2001) Coffee Futures: A Source Book of Some Critical Issues Confronting the Co…	Chemura, A.; Environmental Science and Technology Department, P. Bag 7724, Zimbabwe; email: achemura@gmail.com		Elsevier B.V.	9242716		IRSEE	English	ISPRS J. Photogramm. Remote Sens.	Article	Final		Scopus	2-s2.0-85041713400
Kazama E.H., Da Silva R.P., Tavares T.O., Correa L.N., De Lima Estevam F.N., Nicolau F.E.A., Maldonado Júnior W.	57024141800;15134869500;56288591000;57203531076;57218632083;57130841000;57210182993;	Methodology For Selective Coffee Harvesting In Management Zones Of Yield And Maturation	2021	Precision Agriculture	22	3		711	733		1	10.1007/s11119-020-09751-1	https://www.scopus.com/inward/record.uri?eid=2-s2.0-85089861035&doi=10.1007%2fs11119-020-09751-1&partnerID=40&md5=51e276bd461cd14f803bcab03a3cd2c0	State University São Paulo, brazil ; State University São Paulo, brazil ;	Kazama, E.H., Department of Rural Engineering, School of Agrarian and Veterinary Sciences, São Paulo State University (UNESP), Prof. Paulo Donato Castellane, s/n, Vila Industrial, Jaboticabal, São Paulo, Brazil; da Silva, R.P., Department of Rural Engineering, School of Agrarian and Veterinary Sciences, São Paulo State University (UNESP), Prof. Paulo Donato Castellane, s/n, Vila Industrial, Jabot…	Coffea arabica; Drinking quality; Harvesting speed; Precision agriculture	agricultural management; beverage; coffee; crop production; crop yield; harvesting; maturation; methodology; Coffea arabica	This study was financed in part by the Coordination of Improvement of Higher Education Personnel, CAPES Foundation, Ministry of Education, Brazil (Finance Code 001). Special thanks to the Hallelujah Farm, place of the experiment.			Avendano, J., Ramos, P.J., Prieto, F.A., A system for classifying vegetative structures on coffee branches based on vídeos recorded in the field by a mobile device (2017) Expert Systems with Applications, 88, pp. 178-182; Barros, R.S., Maestri, M., Coons, M.P., The physiology of flowering in coffee: A review (1978) Journal of Coffee Research, 8, pp. 29-73; Barros, R.S., Maestri, M., Rena, A.B., P…	Kazama, E.H.; Department of Rural Engineering, Prof. Paulo Donato Castellane, s/n, Vila Industrial, Brazil; email: bethkazama@hotmail.com		Springer	13852256		PREAF	English	Precis. Agric.	Article	Final		Scopus	2-s2.0-85089861035
Ferraz G.A.S., De Oliveira M.S., Da Silva F.M., Avelar R.C., Da Silva F.C., Ferraz P.F.P.	55322659100;12804341400;55126474900;56378435200;55969247100;56421977300;	Methodology To Determine The Soil Sampling Grid For Precision Agriculture In A Coffee Field [Metodología Para Determinar La Cuadrícula De Muestreo Del Suelo Para La Agricultura De Precisión En Un Campo De Café]	2017	DYNA (Colombia)	84	200		316	325		3	10.15446/dyna.v84n200.52740	https://www.scopus.com/inward/record.uri?eid=2-s2.0-85021837130&doi=10.15446%2fdyna.v84n200.52740&partnerID=40&md5=f92989560d1caca9c07f339fbf791d32	Federal University of Lavras, Lavras, brazil ; Exact Science Department, Federal University of Lavras, Lavras, brazil ; Projeto Educampo Café COOCACER, Cooperativa dos Cafeicultores do Cerrado Monte Carmelo LTDA, Monte Carmelo, brazil ; Agricultural and Environmental Department, Federal University of Fluminense, Passo da Pátria, brazil ;	Ferraz, G.A.S., Engineering Department, Federal University of de Lavras, Lavras, Brazil; de Oliveira, M.S., Exact Science Department, Federal University of de Lavras, Lavras, Brazil; da Silva, F.M., Engineering Department, Federal University of de Lavras, Lavras, Brazil; Avelar, R.C., Projeto Educampo Café COOCACER, Cooperativa dos Cafeicultores do Cerrado Monte Carmelo LTDA, Monte Carmelo, Brazi…	Accuracy index; Geostatistics; Optimum grid indicator; Precision index; Soil fertility; Spatial variability					Alves, M.C., Silva, F.M., Moraes, J.C., Pozza, E.A., Oliveira, M.S., Souza, J.C.S., Alves, L.S., (2011) Geostatistical Analysis of the Spatial Variation of the Berry Borer and Leaf Miner in a Coffee Agroecosystem Precision Agriculture, 12 (1), pp. 18-31; Ayoubi, S.H., Mohamed-Zamani, S., Khormalic, F., Spatial variability of some soil properties for site specific farming in northern Iran (2007) I…			Universidad Nacional de Colombia	127353			English	DYNA	Article	Final	All Open Access, Gold, Green	Scopus	2-s2.0-85021837130
Da Silva A.F., De Souza Lima J.S., De Oliveira R.B.	36247099300;35105264900;15047730700;	Methods Of Interpolation For Estimating The Ph In Soil Under Two Management Of Coffee Arabic [Métodos De Interpolação Para Estimar O Ph Em Solo Sob Dois Manejos De Café Arábica]	2010	Idesia	28	2		61	66		5		https://www.scopus.com/inward/record.uri?eid=2-s2.0-78649421547&partnerID=40&md5=9bbb83d804af704c7270f213cca0a87a	Federal University of Espírito Santo, brazil ; Federal University of Espírito Santo, brazil ; State University São Paulo, brazil ;	da Silva, A.F., Centro de Ciências agrárias, Federal University of do Espírito Santo (CCA-UFES), Rua José Vieira Tatagiba, 61, Guararema, Alegre, ES, CEP: 29.500-000, Brazil; de Souza Lima, J.S., Adjunto do Departamento de Engenharia Rural, CCA-UFES, Alto Universitário, s/n, Alegre, ES, CEP: 29.500-000, Brazil; de Oliveira, R.B., Universidade Estadual de São Paulo, UNESP, Botucatu, SP, Brazil	Estimating; Geostatistics; Management systems					Burrough, P.A., (1986) Principles of Geographical Information Systems for Land Resources Assessment, p. 193. , New York: Oxford University Press; Dadalto, G.G., Fullin, E.A., (2001) Manual De Recomendação De Calagem E Adubação Para O Estado Do Espírito Santo: 4° Aproximação, p. 266. , Vitória, ES: SEEA/INCAPER; Davis, J.G., Hossner, L.R., Wilding, L.P., Manu, A., Variability of soil chemical prop…	da Silva, A. F.; Centro de Ciências agrárias, Rua José Vieira Tatagiba, 61, Guararema, Alegre, ES, CEP: 29.500-000, Brazil; email: alefagiolli@yahoo.com.br			734675			Portuguese	Idesia	Article	Final		Scopus	2-s2.0-78649421547
De Carvalho Alves M., Silva F.M., Pozza E.A., Oliveira M.S.	15047587400;16238082300;12808130000;16175841000;	Modeling Spatial Variability And Pattern Of Rust And Brown Eye Spot In Coffee Agroecosystem	2009	Journal of Pest Science	82	2		137	148		22	10.1007/s10340-008-0232-y	https://www.scopus.com/inward/record.uri?eid=2-s2.0-67349264909&doi=10.1007%2fs10340-008-0232-y&partnerID=40&md5=1208d6ef32dac00ad46763b3099397eb	Federal University of Mato Grosso, brazil ; Federal University of Lavras, brazil; Federal University of Lavras, brazil;	de Carvalho Alves, M., Department of Soil and Rural Engineering, Faculty of Agronomy and Veterinary Medicine, Federal University of Mato Grosso, Av. Fernando Correa da Costa S/N, Cuiabá, MT 78060-900, Brazil; Silva, F.M., Engineering Department, Campus of Federal University of Lavras (UFLA), Lavras, MG 37200-000, Brazil; Pozza, E.A., Department of Phytopathology, UFLA, Lavras, MG 37200-000, Brazi…	Cercospora coffeicola; Disease; Hemileia vastatrix; Ordinary kriging; Plant protection; Precision agriculture	agricultural ecosystem; coffee; disease incidence; disease severity; fungal disease; kriging; modeling; precision agriculture; spatial variation; Coffea arabica; Hemileia vastatrix; Mycosphaerella coffeicola				Agrios, G.N., (2004) Plant Pathology, , Academic Press, San Diego; Avelino, J., Willocquet, L., Savary, S., Effects of crop management patterns on coffee rust epidemics (2004) Plant Pathol, 53, pp. 541-547; Avelino, J., Zelaya, H., Merlo, A., Pineda, A., Ordõnez, M., Savary, S., The intensity of a coffee rust epidemic is dependent on production situations (2006) Ecol Model, 197, pp. 431-447; Bold…	Carvalho Alves, M.; Department of Soil and Rural Engineering, Av. Fernando Correa da Costa S/N, Cuiabá, MT 78060-900, Brazil; email: marcelocarvalhoalves@gmail.com			16124758			English	J. Pest Sci.	Article	Final		Scopus	2-s2.0-67349264909
Ortiz-Gonzalo D., De Neergaard A., Vaast P., Suárez-Villanueva V., Oelofse M., Rosenstock T.S.	57195251228;6603430055;7004558202;57191843896;35111709300;35273085100;	Multi-Scale Measurements Show Limited Soil Greenhouse Gas Emissions In Kenyan Smallholder Coffee-Dairy Systems	2018	Science of the Total Environment	626			328	339		10	10.1016/j.scitotenv.2017.12.247	https://www.scopus.com/inward/record.uri?eid=2-s2.0-85040687377&doi=10.1016%2fj.scitotenv.2017.12.247&partnerID=40&md5=89b226bf38f17a12b8568b74ceb1a278	University of Copenhagen, Denmark; Ecologie fonctionnelle & Biogéochimie des Sols & des Agrosystèmes, France; University of León, Spain; World Agroforestry Centre, Kenya, University of Copenhagen, Denmark;	Ortiz-Gonzalo, D., Department of Plant and Environmental Sciences, University of Copenhagen, Thorvaldsensvej 40, Frederiksberg C, 1871, Denmark, UMR Eco & Sols (CIRAD, Montpellier SupAgro, IRD, INRA), Ecologie fonctionnelle & Biogéochimie des Sols & des Agrosystèmes, 2 place Viala (Bt 12), Montpellier, F-34060 cedex 2, France; de Neergaard, A., Department of Plant and Environmental Sciences, Univ…	Carbon dioxide; Hot moments; Hotspots; Methane; Mixed crop-livestock systems; Nitrous oxide	Agriculture; Carbon; Carbon dioxide; Coffee; Fertilizers; Forestry; Gas chromatography; Gas emissions; Grain (agricultural product); Methane; Nitrogen oxides; Soils; Greenhouse gas (GHG); Hot moments; Hotspots; Livestock systems; Manure applications; Nitrous oxide; Pennisetum purpureum; Spatial and temporal scale; Greenhouse gases; carbon dioxide; carbon emission; coffee; dairy farming; farming s…	We thank the anonymous reviewers who have dedicated their time and effort to make considerable improvements on the manuscript. This work has been conducted as part of a PhD thesis project supported by the Agricultural Transformation by Innovation (AGTRAIN) Erasmus Mundus Joint Doctorate Programme, funded by the EACEA (Education, Audiovisual and Culture Executive Agency) of the European Commission…	We thank the anonymous reviewers who have dedicated their time and effort to make considerable improvements on the manuscript. This work has been conducted as part of a PhD thesis project supported by the Agricultural Transformation by Innovation (AGTRAIN) Erasmus Mundus Joint Doctorate Programme, funded by the EACEA (Education, Audiovisual and Culture Executive Agency) of the European Commission…		Arah, J.R.M., Smith, K.A., Crichton, I.J., Li, H.S., Nitrous oxide production and denitrification in Scottish arable soils (1991) J. Soil Sci., 42, pp. 351-367; Arias-Navarro, C., Díaz-Pinés, E., Kiese, R., Rosenstock, T.S., Rufino, M.C., Stern, D., Neufeldt, H., Butterbach-Bahl, K., Gas pooling: a sampling technique to overcome spatial heterogeneity of soil carbon dioxide and nitrous oxide fluxe…	Ortiz-Gonzalo, D.; Department of Plant and Environmental Sciences, Thorvaldsensvej 40, Denmark; email: gonzalo@plen.ku.dk		Elsevier B.V.	489697		STEVA	English	Sci. Total Environ.	Article	Final	All Open Access, Hybrid Gold, Green	Scopus	2-s2.0-85040687377
Marin D.B., De Carvalho Alves M., Pozza E.A., Belan L.L., De Oliveira Freitas M.L.	57203659828;54986802600;12808130000;55184945700;57205060273;	Multispectral Radiometric Monitoring Of Bacterial Blight Of Coffee	2019	Precision Agriculture	20	5		959	982		4	10.1007/s11119-018-09623-9	https://www.scopus.com/inward/record.uri?eid=2-s2.0-85058411207&doi=10.1007%2fs11119-018-09623-9&partnerID=40&md5=4b8cc1972f634fbc8dec2197e4a368c6	federal university of lavras, brazil; Federal University of Lavras, brazil; Federal University of Espírito Santo, brazil ;	Marin, D.B., Engineering Department, Federal University of Lavras, P.O BOX 3037, Lavras, MG CEP 37200-000, Brazil; de Carvalho Alves, M., Engineering Department, Federal University of Lavras, P.O BOX 3037, Lavras, MG CEP 37200-000, Brazil; Pozza, E.A., Plant Pathology Department, Federal University of Lavras, P.O BOX 3037, Lavras, MG CEP 37200-000, Brazil; Belan, L.L., Agronomy Department, Federa…	Coffee; Landsat 8; Pseudomonas syringae pv. garcae; Remote sensing; Vegetation indices	bacterial disease; brightness temperature; coffee; Landsat; satellite imagery; sensor; time series; vegetation; vegetation index; Brazil; Minas Gerais; Bacteria (microorganisms); Coffea arabica; Pseudomonas syringae pv. garcae	To the Neumman Kaffee Gruppe (NKG) for allowing implementing the experiments in their crops and providing the management logistics of these areas. To the technical support team and the Foundation for Supporting Research of the State of Minas Gerais (FAPEMIG) for funding the study.	Acknowledgements To the Neumman Kaffee Gruppe (NKG) for allowing implementing the experiments in their crops and providing the management logistics of these areas. To the technical support team and the Foundation for Supporting Research of the State of Minas Gerais (FAPEMIG) for funding the study.		Ahamed, T., Tian, L., Zhang, Y., Ting, K.C., A review of remote sensing methods for biomass feedstock production (2011) Biomass and Bioenergy, 35 (7), pp. 2455-2469; Alisaac, E., Behmann, J., Kuska, M.T., Dehne, H.W., Mahlein, A.K., Hyperspectral quantification of wheat resistance to Fusarium head blight: comparison of two Fusarium species (2018) European Journal of Plant Pathology; Amaral, J.D.,…	de Oliveira Freitas, M.L.; Plant Pathology Department, P.O BOX 3037, Brazil; email: marcelo.alves@deg.ufla.br		Springer New York LLC	13852256		PREAF	English	Precis. Agric.	Article	Final		Scopus	2-s2.0-85058411207
Marin D.B., Alves M.C., Pozza E.A., Gandia R.M., Cortez M.L.J., Mattioli M.C.	57203659828;15047587400;12808130000;57193430004;57209247430;56037667100;	Multispectral Remote Sensing In The Identification And Mapping Of Biotic And Abiotic Coffee Tree Variables [Sensoriamento Remoto Multiespectral Na Identificação E Mapeamento Das Variáveis Bióticas E Abióticas Do Cafeeiro]	2019	Revista Ceres	66	2		142	153		3	10.1590/0034-737X201966020009	https://www.scopus.com/inward/record.uri?eid=2-s2.0-85066983351&doi=10.1590%2f0034-737X201966020009&partnerID=40&md5=2f3435655f8d005c32a789c2d034a92c	federal university of lavras, brazil;	Marin, D.B., Federal University of de Lavras, Departamento de Engenharia Agrícola e de Fitopatologia, Lavras, Minas Gerais, Brazil; Alves, M.C., Federal University of de Lavras, Departamento de Engenharia Agrícola e de Fitopatologia, Lavras, Minas Gerais, Brazil; Pozza, E.A., Federal University of de Lavras, Departamento de Engenharia Agrícola e de Fitopatologia, Lavras, Minas Gerais, Brazil; Gan…	Agronomic variables; Coffea arabica L.; Landsat-5 TM; Precision agriculture; Vegetation indices					Ahamed, T., Tian, L., Zhang, Y., Ting, K.C., A review of remote sensing methods for biomass feedstock production (2011) Biomass and Bioenergy, 35, pp. 2455-2469; Alves, M.C., (2006) Geoestatística e sistemas 'fuzzy' na proteção de plantas, p. 186. , Tese de Doutorado. Federal University of de Lavras, Lavras; Alves, M.C., Silva, F.M., Moraes, J.C., Pozza, E.A., Oliveira, M.S., Souza, J.C., Alves, …	Marin, D.B.; Federal University of de Lavras, Brazil; email: db.marin@hotmail.com		Federal University of de Vicosa	0034737X			Portuguese	Rev. Ceres	Article	Final	All Open Access, Gold	Scopus	2-s2.0-85066983351
De Assis Silva S., De Souza Lima J.S.	25637770400;55312612800;	Multivariate Analysis And Geostatistics Of The Fertility Of A Humic Rhodic Hapludox Under Coffee Cultivation [Análise Multivariada E Geoestatística Da Fertilidade De Um Latossolo Vermelho-Amarelo Húmico Cultivado Com Café]	2012	Revista Brasileira de Ciencia do Solo	36	2		467	474		17	10.1590/S0100-06832012000200016	https://www.scopus.com/inward/record.uri?eid=2-s2.0-84863791669&doi=10.1590%2fS0100-06832012000200016&partnerID=40&md5=a7b256fb7dcd0291480efa5e95151817	State University Santa Cruz, Brazil; Federal University of Espírito Santo, brazil ;	de Assis Silva, S., Department of Agricultural and Environmental Sciences, State University of Santa Cruz, Ilhéus, BA, Zip Code 45662-900, Brazil; de Souza Lima, J.S., Department of Agricultural Engineering, Federal University of Espirito Santo, Alegre, ES, Zip Code 29500-000, Brazil	Cluster analysis; Coffea arabica L.; Precision agriculture; Principal components	Coffea arabica				Boruvka, L., Vacek, O., Jehlicka, J., Principal component analysis as a tool to indicate the origin of potentially toxic elements in soils (2005) Geoderma, 128, pp. 289-300; Cambardela, C.A., Moorman, T.B., Novak, J.M., Parkin, T.B., Karlen, D.L., Turco, R.F., Konopka, A.E., Field-scale variability of soil properties in central Iowa soils (1994) Soil Sci. Soc. Am. J., 58, pp. 1501-1511; Corá, J.E…	de Assis Silva, S.; Department of Agricultural and Environmental Sciences, , Ilhéus, BA, Zip Code 45662-900, Brazil; email: samuel-assis@hotmail.com			1000683			English; Portuguese	Rev. Bras. Cienc. Solo	Article	Final	All Open Access, Gold, Green	Scopus	2-s2.0-84863791669
Furfaro R., Ganapol B.D., Johnson L.F., Herwitz S.R.	12645288600;7007078474;7404800168;7004261649;	Neural Network Algorithm For Coffee Ripeness Evaluation Using Airborne Images	2007	Applied Engineering in Agriculture	23	3		379	387		12		https://www.scopus.com/inward/record.uri?eid=2-s2.0-34347210668&partnerID=40&md5=bb33cc2cd58255e3151fabe079a4b4c5	University of Arizona, United States; University of Arizona, United States; California State University, United States; Clark University, United States; NASA Ames Research Center, United States; NASA Research Park, United States;	Furfaro, R., Department of Aerospace and Mechanical Engineering, University of Arizona, Tucson, AZ, United States; Ganapol, B.D., Department of Aerospace and Mechanical Engineering, University of Arizona, Tucson, AZ, United States, Department of Hydrology and Water Resources, University of Arizona, Tucson, AZ, United States; Johnson, L.F., Division of Science and Environmental Policy, California …	Coffee arabica L.; Model inversion; Neural networks; Radiative transfer; Remote sensing; Ripeness evaluation	Algorithms; Harvesting; Neural networks; Radiative transfer; Reflection; Remote sensing; Unmanned aerial vehicles (UAV); High-resolution surface reflectance images; Near-infrared crop canopy reflectance; Ripeness evaluation; Crops				Abuelgasim, A.A., Gopal, S., Strahler, A.H., Forward and inverse modeling of canopy directional reflectance using a neural network (1998) Int'l. J. Remote Sensing, 19 (3), pp. 453-471; Atkinson, P.M., Tatnall, A.R.L., Neural networks in remote sensing (1997) Int'l. J. Remote Sensing, 18 (4), pp. 699-709; Atzberger, C., Object-based retrieval of biophysical canopy variables using artificial neural…	Johnson, L.F.; Earth Science Division, MS242-4, Moffett Field, CA 94035-1000, United States; email: Ljohnson@mail.arc.nasa.gov			8838542		AEAGE	English	Appl Eng Agric	Article	Final		Scopus	2-s2.0-34347210668
Putra B.T.W.	57193233025;	New Low-Cost Portable Sensing System Integrated With On-The-Go Fertilizer Application System For Plantation Crops	2020	Measurement: Journal of the International Measurement Confederation	155		107562				2	10.1016/j.measurement.2020.107562	https://www.scopus.com/inward/record.uri?eid=2-s2.0-85078894721&doi=10.1016%2fj.measurement.2020.107562&partnerID=40&md5=580c4aaf1e82fa8e5054ec44b8841ab7	Jember University, Indonesia;	Putra, B.T.W., Laboratory of Precision Agriculture and Geo-informatics, Faculty of Agricultural Technology, Jember University, Jember, East Java 68121, Indonesia	Chlorophyll; IoT; Measurement; Nitrogen fertilizer; Plantation crop; RGB Sensor	Antennas; Chlorophyll; Costs; Crops; Global positioning system; Measurement; Nutrients; Remote sensing; Chlorophyll contents; Fertilizer applications; Ground-based remote sensing; Nutrient deficiency; Nutrient requirement; Rapid measurement; Sensing systems; Substantial investments; Nitrogen fertilizers				Sitthaphanit, S., Limpinuntana, V., Toomsan, B., Panchaban, S., Bell, R.W., Fertiliser strategies for improved nutrient use efficiency on sandy soils in high rainfall regimes (2009) Nutr. Cycl. Agroecosystems., 85, pp. 123-139; Winston, E., Op de Laak, J., Marsh, T., Lempke, H., Chapmen, K., Arabica coffee manual for Lao, RAP Publication 2005/08 (2005), FAO Regional Office for Asia and the Pacifi…			Elsevier B.V.	2632241		MSRMD	English	Meas J Int Meas Confed	Article	Final		Scopus	2-s2.0-85078894721
Da Silva A.L., Reichardt K., Roveratti R., Bacchi O.O.S., Timm L.C., Oliveira J.C.M., Dourado-Neto D.	27171186100;7003597145;12807409400;6701398896;15766615700;7202451966;7004141879;	On The Use Of Soil Hydraulic Conductivity Functions In The Field	2007	Soil and Tillage Research	93	1		162	170		12	10.1016/j.still.2006.03.024	https://www.scopus.com/inward/record.uri?eid=2-s2.0-33846223546&doi=10.1016%2fj.still.2006.03.024&partnerID=40&md5=3463e157939dcf3d830dee4066508516	University of São Paulo, Brazil; Federal University of Pelotas, brazil ; Municipal University of Piracicaba, brazil ; University of São Paulo, Brazil;	da Silva, A.L., Soil Physics Laboratory, CENA/USP, CP 96, 13400-970 Piracicaba, SP, Brazil; Reichardt, K., Soil Physics Laboratory, CENA/USP, CP 96, 13400-970 Piracicaba, SP, Brazil; Roveratti, R., Soil Physics Laboratory, CENA/USP, CP 96, 13400-970 Piracicaba, SP, Brazil; Bacchi, O.O.S., Soil Physics Laboratory, CENA/USP, CP 96, 13400-970 Piracicaba, SP, Brazil; Timm, L.C., Federal University of…	Darcy-Buckingham equation; Soil hydraulic conductivity; Soil variability; Soil water flux	Climatology; Hydraulic conductivity; Parameter estimation; Soils; Water; Darcy-Buckingham equation; Soil hydraulic conductivity; Soil variability; Soil water flux; Soil mechanics; estimation method; field; hydraulic conductivity; soil water; soil water potential				Addiscott, T.M., (1993) Simulation Modelling and Soil Behaviour, 60, pp. 15-40. , Wagenet R.J., and Bouma J. (Eds), Geoderma; Bouma, J., Using soil morphology to develop measurement methods and simulation techniques for water movement in heavy clay soils (1984) Proceedings of the ISSS Symposium on Water and Solute Movement in Heavy Clay Soils, International Institute for Land Reclamation and Impr…	da Silva, A.L.; Soil Physics Laboratory, CP 96, 13400-970 Piracicaba, SP, Brazil; email: adriana.lucia.silva@gmail.com			1671987		SOTRD	English	Soil Tillage Res.	Article	Final		Scopus	2-s2.0-33846223546
De Barros M.M., Volpato C.E.S., Da Silva F.M., Da Conceição F.G., Corrêa Júnior D., Ribeiro L.F.	36174806000;16318164900;55126474900;57073548700;57073847500;57072643100;	Performance Of A Variable-Rate Distribution System For Simultaneous Fertilizer Application [Desempenho De Um Sistema De Distribuição De Fertilizantes De Aplicação Simultânea A Taxa Variável]	2016	Revista Brasileira de Engenharia Agricola e Ambiental	20	2		188	192		4	10.1590/1807-1929/agriambi.v20n2p188-192	https://www.scopus.com/inward/record.uri?eid=2-s2.0-84955269365&doi=10.1590%2f1807-1929%2fagriambi.v20n2p188-192&partnerID=40&md5=f7c1dca3f1d0454099f70eb7c23fa0c2	Federal University of Rural do Rio de Janeiro, brazil ; Federal University of Lavras, Departamento de Engenharia, Lavras, MG, brazil ;	de Barros, M.M., Federal University of Rural do Rio de Janeiro, Instituto de Tecnologia, Departamento de Engenharia, Seropédica, RJ, Brazil; Volpato, C.E.S., Federal University of de Lavras, Departamento de Engenharia, Lavras, MG, Brazil; da Silva, F.M., Federal University of de Lavras, Departamento de Engenharia, Lavras, MG, Brazil; da Conceição, F.G., Federal University of de Lavras, Departamen…	Application at variable doses; Coffee production; Precision agriculture					Barros, M.M., Volpato, C.E.S., Silva, F.C., Palma, M.A.Z., Spagnolo, R.T., Avaliação de um sistema de aplicação de fertilizantes a taxa variável adaptado à cultura do café (2015) Coffee Science, 10, pp. 223-633; Bottega, E.L., Queiroz, D.M., De Pinto, F.A.C., Souza, C.M.A., Variabilidade espacial de atributos do solo em sistema de semeadura direta com rotação de culturas no cerrado brasileiro (20…	de Barros, M.M.; Federal University of Rural do Rio de Janeiro, Brazil; email: egmurilo@yahoo.com.br		Departamento de Engenharia Agricola - UFCG/Cnpq	14154366			English	Rev. Bras. Eng. Agric. Ambient.	Article	Final	All Open Access, Gold, Green	Scopus	2-s2.0-84955269365
De Assis Silva S., De Souza Lima J.S.	25637770400;55312612800;	Physical Attributes Of Soil And Its Relation With Space Productivity Of Coffee Arabic [Atributos Físicos Do Solo E Sua Relação Espacial Com A Produtividade Do Café Arábica]	2013	Coffee Science	8	4		395	403		6		https://www.scopus.com/inward/record.uri?eid=2-s2.0-84898435591&partnerID=40&md5=c82eb9225b3cddc66a2e3f5fd9c6ab2d	State University Santa Cruz, Brazil; Federal University of Espírito Santo, brazil ;	de Assis Silva, S., Universidade Estadual de Santa Cruz/UESC, Departamento de Ciências Agrárias e Ambientais/DCAA, 54.662-900 - Ilhéus - BA, Brazil; de Souza Lima, J.S., Federal University of do Espírito Santo/UFES, Departamento de engenharia Rural/ERU, 29.000-500 - Alegre - ES, Brazil	Coffea arabica L; Cokriging; Geostatistics; Spatial variability					Andrade, A.R.S., Variabilidade espacial da densidade do solo sob manejo da irrigação (2005) Ciência e Agrotecnologia, 29 (2), pp. 322-329. , mar./abr. Lavras; Cambardella, C.A., Field-scale variability of soil properties in central Iowa soils (1994) Soil Science Society American Journal, 58, pp. 1501-1511. , Madison; Collares, G.L., Compactação de um Latossolo induzida pelo tráfego de máquinas e …			Editora UFLA	18096875			English; Portuguese	Coffee Sci.	Article	Final		Scopus	2-s2.0-84898435591
De Jesus Santos E.O., Gontijo I., Da Silva M.B.	56113098400;23984882800;36881021900;	Planning Sample Of Chemical Soil Properties On A Conilon Coffee Plantation [Planejamento Amostral De Propriedades Químicas Do Solo Em Lavoura De Café Conilon]	2013	Coffee Science	8	4		423	431		5		https://www.scopus.com/inward/record.uri?eid=2-s2.0-84898475905&partnerID=40&md5=189ce8a75a923903e8f333be2d146a7f	Federal University of Espírito Santo, brazil ;	de Jesus Santos, E.O., Federal University of do Espírito Santo/UFES, Centro Universitário Norte do Espírito Santo/CEUNES, Departamento de Ciências Agrárias e Biológicas/DCAB, 29.9932 - São Mateus - ES, Brazil; Gontijo, I., Federal University of do Espírito Santo/UFES, Centro Universitário Norte do Espírito Santo/CEUNES, Departamento de Ciências Agrárias e Biológicas/DCAB, 29.9932 - São Mateus - E…	Classical statistics; Geostatistics; Macronutrients; Soil sampling					(2012) ACTION, , ACTION DEVELOPMENT CORE TEAM., 2. 3: ESTATCAMP. São Carlos; Barbieri, D.M., Marques Jr., J., Pereira, G.T., Variabilidade espacial de atributos químicos de um Argissolo para aplicação de insumos à taxa variável em diferentes formas de relevo (2008) Engenharia Agrícola, 28 (4), pp. 645-653. , Jaboticabal; Cambardella, C.A., Field-scale variability of soil properties in central Iow…			Editora UFLA	18096875			English; Portuguese	Coffee Sci.	Article	Final		Scopus	2-s2.0-84898475905
Ferraz G.A.S., De Oliveira M.S., Da Silva F.M., Sales R.S., Carvalho L.C.C.	55322659100;12804341400;55126474900;56522756700;17134352200;	Plant Sampling Grid Determination In Precision Agriculture In Coffee Field [Determinação De Malhas Amostrais Da Planta Em Cafeicultura De Precisão]	2018	Coffee Science	13	1		112	121		1	10.25186/cs.v13i1.1391	https://www.scopus.com/inward/record.uri?eid=2-s2.0-85047066499&doi=10.25186%2fcs.v13i1.1391&partnerID=40&md5=d1445c76d2e032d34e5a0bb7d6a50f23	federal university of lavras, brazil; Federal University of Lavras, brazil; University Center of Formiga, brazil ; State University Santa Cruz, Brazil;	Ferraz, G.A.S., Federal University of Lavras/ULFA, Department of Engineering/DEG, Lavras, MG 37.200-000, Brazil; de Oliveira, M.S., Federal University of Lavras, UFLA, Department of Exact Sciences/DEX, Lavras, MG 37.200-000, Brazil; da Silva, F.M., Federal University of Lavras/ULFA, Department of Engineering/DEG, Lavras, MG 37.200-000, Brazil; Sales, R.S., University Center of Formiga/UNIFOR, Ave…	Coffee tree; Geostatistics; Precision agriculture; Spatial variability					Alves, M.C., Geostatistical analysis of the spatial variation of the berry borer and leaf miner in a coffee agroecosystem (2009) Precision Agriculture, Dordrecht, 10 (12), pp. 1-14. , Dec; Bachmaier, M., Backers, M., Variogram or semivariogram?: Understanding the variances in a variogram (2008) Precision Agriculture, Dordrecht, 9, pp. 173-175. , Feb; Cambardella, C.A., Field scale variability of …			Editora UFLA	18096875			English	Coffee Sci.	Article	Final	All Open Access, Hybrid Gold, Green	Scopus	2-s2.0-85047066499
Ferraz G.A.S., Da Silva F.M., Da Costa P.A.N., Silva A.C., Carvalho F.M.	55322659100;55126474900;39761348000;56309178200;24398635900;	Precision Agriculture To Study Soil Chemical Properties And The Yield Of A Coffee Field [Agricultura De Precisao No Estudo De Atributos Químicos Do Solo E Da Produtividade De Lavoura Cafeeira]	2012	Coffee Science	7	1		59	67		21		https://www.scopus.com/inward/record.uri?eid=2-s2.0-84864359354&partnerID=40&md5=e7680fb4f96873f014004bac622d7067	Federal University of Rural do Rio de Janeiro, brazil ; Federal University of Lavras, brazil; Federal University of Lavras, brazil;	Ferraz, G.A.S., Federal University of Rural do Rio de Janeiro/UFRRJ, Instituto de Tecnología-, Departamento de Engenharia-(IT/DE), Rodovia BR 465-Km 7, 23.890-000 Seropédica-RJ, Brazil; da Silva, F.M., Federal University of de Lavras /UFLA, Departamento de Engenharia/DEG, Cx. P. 3037, 37.200-000 Lavras-MG, Brazil; da Costa, P.A.N., Federal University of de Lavras /UFLA, Departamento de Engenharia…	Coffee plant; Geostatistic; Kriging; Semivariogram; Spatial variability					Cambardella, C.A., Field scale variability of soil properties in Central Iowa soils (1994) Soil Science Society of America Journal, 58 (5), pp. 1501-1511. , Madison; Carvalho, G.R., Avaliaçâo de produtividade de progenies de cafeeiro em dois sistemas de plantío (2006) Ciencia E Agrotecnologia, 30 (5), pp. 838-843. , Lavras, set./out; Carvalho, G.R., (2009) Comportamento De Progenies F4 Obtidas Po…	Ferraz, G. A. S.; Federal University of Rural do Rio de Janeiro/UFRRJ, Rodovia BR 465-Km 7, 23.890-000 Seropédica-RJ, Brazil; email: gabrielferraz@ufrrj.br			18096875			English; Portuguese	Coffee Sci.	Article	Final		Scopus	2-s2.0-84864359354
Sott M.K., Furstenau L.B., Kipper L.M., Giraldo F.D., Lopez-Robles J.R., Cobo M.J., Zahid A., Abbasi Q.H., Imran M.A.	57218374403;57211463471;12143252800;36630210800;57204774549;25633455900;57198859755;35408616600;24070821000;	Precision Techniques And Agriculture 4.0 Technologies To Promote Sustainability In The Coffee Sector: State Of The Art, Challenges And Future Trends	2020	IEEE Access	8		9166468	149854	149867		15	10.1109/ACCESS.2020.3016325	https://www.scopus.com/inward/record.uri?eid=2-s2.0-85090297084&doi=10.1109%2fACCESS.2020.3016325&partnerID=40&md5=8d28ce483e65f99700679e3fb88efac3	University of Santa Cruz do sul, brazil ; SINFOCI Research Group, Colombia; Autonomous University of Zacatecas, Mexico, University of Cádiz, Spain; University of Glasgow, United Kingdom;	Sott, M.K., Graduate Program of Industrial Systems and Processes, University of Santa Cruz Do sul, Santa Cruz do Sul, 96816-501, Brazil, SINFOCI Research Group, Faculty of Engineering, University of Quindío, Armenia, 630004, Colombia; Furstenau, L.B., Graduate Program of Industrial Systems and Processes, University of Santa Cruz Do sul, Santa Cruz do Sul, 96816-501, Brazil; Kipper, L.M., Graduate…	Agriculture 4.0; bibliometric; coffee; digital agriculture; digital transformation; industry 4.0; precision agriculture; strategic intelligence; sustainability	Agricultural robots; Decision making; Engineering education; Agricultural productions; Geo-statistics; State of the art; Systematic literature review (SLR); Systematic Review; Technological adoption; Thematic network; Web of Science; Agriculture	This work was supported in part by the Engineering and Physical Sciences Research Council (EPSRC) Doctoral Training Grant (DTG) under Grant EP/N509668/1 Eng, in part by the double degree agreement between the Master in Industrial Systems and Processes of the University of Santa Cruz do Sul, Brazil, in part by the Master in Engineering with emphasis on Software Engineering of the University of Qui…	To achieve our goal, a SLR supported by the PRISMA protocol, and a BPNA with the support of the SciMAT software was carried out. To guide this review, three research questions (RQ1 - 3) were defined: RQ1 - What are the strategic themes related to PA and A4.0 in the coffee sector?		Van Der Burg, S., Bogaardt, M.-J., Wolfert, S., Ethics of smart farming: Current questions and directions for responsible innovation towards the future (2019) Njas Wageningen J. Life Sci., 90-91. , Dec; Lezoche, M., Hernandez, J.E., Díaz, M.D.M.E.A., Panetto, H., Kacprzyk, J., Agri-food 4.0: A survey of the supply chains and technologies for the future agriculture (2020) Comput. Ind., 117. , May;…	Sott, M.K.; Graduate Program of Industrial Systems and Processes, Brazil; email: sott.mk@gmail.com		Institute of Electrical and Electronics Engineers Inc.	21693536			English	IEEE Access	Article	Final	All Open Access, Gold, Green	Scopus	2-s2.0-85090297084
Ferraz G.A.S., Ferraz P.F.P., Martins F.B., Silva F.M., Damasceno F.A., Barbari M.	55322659100;56421977300;57209328760;57210995228;26423473600;14420748600;	Principal Components In The Study Of Soil And Plant Properties In Precision Coffee Farming	2019	Agronomy Research	17	2		418	429		1	10.15159/AR.19.114	https://www.scopus.com/inward/record.uri?eid=2-s2.0-85067387186&doi=10.15159%2fAR.19.114&partnerID=40&md5=f41f1ef7c0bf2c2600b7280069c65e76	federal university of lavras, brazil; Rural Federal University of Rio de Janeiro, brazil ; Università degli Studi di Firenze, Italy;	Ferraz, G.A.S., Federal University of Lavras – UFLA, Departament of Agricultural Engineering, University Campus, Lavras-MG, BR37200-000, Brazil; Ferraz, P.F.P., Federal University of Lavras – UFLA, Departament of Agricultural Engineering, University Campus, Lavras-MG, BR37200-000, Brazil; Martins, F.B., Rural Federal University of Rio de Janeiro – UFRRJ, BR-465, Km 7,, Seropédica, RJ BR 23.897-00…	Coffee plant; Fertility; Management; Multivariate analysis; Precision agriculture		ACKNOWLEDGEMENTS. The authors thank the National Council for Scientific and TechnologicalDevelopment(CNPq),theCoordinationfortheImprovementofHigherEducation Personnel (CAPES), the Foundation for Research of the State of Minas Gerais (FAPEMIG), the Federal University of Lavras (UFLA), the Federal Rural University of Rio de Janeiro (UFRRJ) thePostgraduatePrograminAgriculturalandEnvironmentalEnginee…			Almeida, A.P.S., (2011) Impact of the ICMS Credit on the Cost of Production in Coffee Production: A Study of the Main Producing Regions of Arabica Coffee in Brazil., , https://repositorio.ufu.br/handle/123456789/11948, Available, Accessed 7.12.2018 (in Portuguese); Alves, M.C., Silva, F.M., Ferreira, T.A., Silva, F.C., Neuro-fuzzy operational performance of a coffee harvester machine (2009) Journ…	Ferraz, G.A.S.; Federal University of Lavras – UFLA, Brazil; email: gabriel.ferraz@ufla.br		Eesti Pollumajandusulikool	1406894X			English	Agron. Res.	Article	Final		Scopus	2-s2.0-85067387186
Kouadio L., Byrareddy V.M., Sawadogo A., Newlands N.K.	55043749800;57204451427;57218880390;8772961900;	Probabilistic Yield Forecasting Of Robusta Coffee At The Farm Scale Using Agroclimatic And Remote Sensing Derived Indices	2021	Agricultural and Forest Meteorology	306		108449					10.1016/j.agrformet.2021.108449	https://www.scopus.com/inward/record.uri?eid=2-s2.0-85105466541&doi=10.1016%2fj.agrformet.2021.108449&partnerID=40&md5=df8f5304b36253b427f97bd7289df4c4	University of Southern Queensland, Austrália; University of Uludag, Turkey, Agriculture and Agri-Food Canada, Canada	Kouadio, L., Centre for Applied Climate Sciences, University of Southern Queensland, Toowoomba, Queensland 4350, Australia; Byrareddy, V.M., Centre for Applied Climate Sciences, University of Southern Queensland, Toowoomba, Queensland 4350, Australia; Sawadogo, A., Biosystems Engineering Department, Faculty of Agriculture, University of Uludag, Görükle Kampüsü, Nilüfer, Bursa 16059, Turkey; Newla…	Climate risk management; Coffea canephora; Crop yield forecasting; Remote sensing	agricultural management; agroindustry; agrometeorology; coffee; crop yield; growing season; remote sensing; spatiotemporal analysis; supply chain management; Dak Lak; Lam Dong; Viet Nam; Coffea canephora	We gratefully acknowledge the valuable support of ECOM's field surveys team in collecting and processing field data, as well as all the coffee farmers who participated in the interviews and generously provided information about their production systems. We acknowledge the funding received from the German Federal Ministry for the Environment, Nature Conservation, Building and Nuclear Safety (BMUB)…	We gratefully acknowledge the valuable support of ECOM's field surveys team in collecting and processing field data, as well as all the coffee farmers who participated in the interviews and generously provided information about their production systems. We acknowledge the funding received from the German Federal Ministry for the Environment, Nature Conservation, Building and Nuclear Safety (BMUB)…		Allen, R., Trezza, R., Tasumi, M., Kjaersgaard, J., Mapping Evapotranspiration at High Resolution using Internalized Calibration Applications (2014), Manual for Landsat Satellite Imagery Version 3.0; Allen, R.G., Tasumi, M., Morse, A., Trezza, R., Wright, J.L., Bastiaanssen, W., Satellite-based energy balance for mapping evapotranspiration with internalized calibration (METRIC)—applications (2007…	Kouadio, L.; Centre for Applied Climate Sciences, Australia; email: louis.kouadio@usq.edu.au		Elsevier B.V.	1681923		AFMEE	English	Agric. For. Meterol.	Article	Final		Scopus	2-s2.0-85105466541
Rivera L.B., Bonilla B.M., Obando-Vidal F.	57223854417;57223849060;57222135339;	Processing Multispectral Imaging Captured By Drones To Evaluate The Normalized Difference Vegetation Index Of Castillo Coffee Plantations [Procesamiento De Imágenes Multiespectrales Captadas Con Drones Para Evaluar El Índice De Vegetación De Diferencia Normalizada En Plantaciones De Café Variedad Castillo]	2021	Ciencia Tecnologia Agropecuaria	22	1	e1578					10.21930/RCTA.VOL22_NUM1_ART1578	https://www.scopus.com/inward/record.uri?eid=2-s2.0-85106282547&doi=10.21930%2fRCTA.VOL22_NUM1_ART1578&partnerID=40&md5=c7901877d9ab3a5e095277a5c50b0c93	Corporación universitaria Comfacauca - Unicomfacauca, Popayán, Colombia;	Rivera, L.B., Corporación universitaria Comfacauca - Unicomfacauca, Popayán, Colombia; Bonilla, B.M., Corporación universitaria Comfacauca - Unicomfacauca, Popayán, Colombia; Obando-Vidal, F., Corporación universitaria Comfacauca - Unicomfacauca, Popayán, Colombia	Coffee; Geographical information systems; Multispectral imaging; NDVI; Precision agriculture					Aristizábal, J., (2017) Repositorio UCM, , http://hdl.handle.net/10839/1928, Comparación de la respuesta de diferentes índices de vegetación del frailejón a partir de diferentes metodologías (índices) como indicador indirecto del estado de conservación del humedal [Tesis de pregrado, Universidad Católica de Manizales]; Bongiovanni, R., Chartuni, E., Best, S., Roel, Á., (2006) Agricultura de preci…			Corporacion Colombiana de Investigacion Agropecuaria Corpoica	1228706			Spanish	Cienc. Tecnol. Agropecu.	Article	Final		Scopus	2-s2.0-85106282547
Nogueira S.M.C., Moreira M.A., Volpato M.M.L.	57200856327;55999108900;38062252600;	Relationship Between Coffee Crop Productivity And Vegetation Indexes Derived From Oli / Landsat-8 Sensor Data With And Without Topographic Correction	2018	Engenharia Agricola	38	3		387	394		5	10.1590/1809-4430-Eng.Agric.v38n3p387-394/2018	https://www.scopus.com/inward/record.uri?eid=2-s2.0-85049106031&doi=10.1590%2f1809-4430-Eng.Agric.v38n3p387-394%2f2018&partnerID=40&md5=101b15eb71574da6da61072a70ae8884	Instituto Nacional de Pesquisas Espaciais, São José dos Campos - SP, brazil ; Empresa de Pesquisa Agropecuária de Minas Gerais, lavras, brazil ;	Nogueira, S.M.C., Instituto Nacional de Pesquisas Espaciais, São José dos Campos - SP, Brazil; Moreira, M.A., Instituto Nacional de Pesquisas Espaciais, São José dos Campos - SP, Brazil; Volpato, M.M.L., Empresa de Pesquisa Agropecuária de Minas Gerais, Lavras - MG, Brazil	Coffee; NDVI; NDWI; Remote sensing; SAVI; Yield					Alvares, C.A., Stape, J.L., Sentelhas, P.C., Gonçalves, J.L.M., Sparovek, G., Köppen's climate classification map for Brazil (2013) Meteorologische Zeitschrift, 22 (6), pp. 711-728; Bernardes, T., Moreira, M.A., Adami, M., Giarolla, A., Rudorff, B.F.T., Monitoring biennial bearing effect on coffee yield using MODIS remote sensing imagery (2012) Remote Sensing, 4, pp. 2492-2509; Bolton, D.K., Frie…	Nogueira, S.M.C.; Instituto Nacional de Pesquisas EspaciaisBrazil; email: suli@dsr.inpe.br		Sociedade Brasileira de Engenharia Agricola	1006916			English	Eng. Agric.	Article	Final	All Open Access, Gold, Green	Scopus	2-s2.0-85049106031
Chemura A., Mutanga O., Dube T.	55839089000;55912148400;55629520500;	Remote Sensing Leaf Water Stress In Coffee (Coffea Arabica) Using Secondary Effects Of Water Absorption And Random Forests	2017	Physics and Chemistry of the Earth	100			317	324		12	10.1016/j.pce.2017.02.011	https://www.scopus.com/inward/record.uri?eid=2-s2.0-85014660509&doi=10.1016%2fj.pce.2017.02.011&partnerID=40&md5=f76e9633c0b9c275c701d0ee6713f4dd	University of Kwa-Zulu-Natal, South Africa; Chinhoyi University of Technology, Zimbabwe; University of Limpopo, South Africa	Chemura, A., University of Kwa-Zulu-Natal, Discipline of Geography, P. Bag XO1, Scottsville, Pietermaritzburg, 3209, South Africa, Environmental Science and Technology Department, Chinhoyi University of Technology, P. Bag 7724, Chinhoyi, Zimbabwe; Mutanga, O., University of Kwa-Zulu-Natal, Discipline of Geography, P. Bag XO1, Scottsville, Pietermaritzburg, 3209, South Africa; Dube, T., Department…	Coffee; Plant water content; Random forests; Remote sensing; Water stress monitoring	Agricultural robots; Coffee; Composting; Crops; Decision trees; Forecasting; Irrigation; Plants (botany); Random forests; Reflection; Remote sensing; Stresses; Water management; Cross correlations; Irrigation practices; Landscape scale; Physiological characteristics; Plant water content; Random forest algorithm; Reflectance differences; Water stress; Water absorption; algorithm; coffee; crop prod…	We are very grateful to Coffee Research Institute for providing facilities and staff to support this research. This research was also partly funded by IFS grants D/5441 .			Ahmed, A., Sharkawy, M.E., Ramily, S.E., Analysis of inter-band spectral cross-correlation structure of hyperspectral data. (2012) Paper presented at the WSEAS International Conference., pp. 71-78. , Proceedings. Recent Advances in Computer Engineering Series; Blackburn, G.A., Hyperspectral remote sensing of plant pigments (2007) J. Exp. Bot., 58 (4), pp. 855-867; Breiman, L., Random forests (200…	Chemura, A.; Environmental Science and Technology Department, P. Bag 7724, Zimbabwe; email: achemura@gmail.com		Elsevier Ltd	14747065		PCEHA	English	Phys. Chem. Earth	Article	Final		Scopus	2-s2.0-85014660509
Brunsell N.A., Pontes P.P.B.	8987692000;35620963000;	Remotely Sensed Phenology Of Coffee And Its Relationship To Yield	2009	GIScience and Remote Sensing	46	3		289	304		10	10.2747/1548-1603.46.3.289	https://www.scopus.com/inward/record.uri?eid=2-s2.0-76149132314&doi=10.2747%2f1548-1603.46.3.289&partnerID=40&md5=f427b9428a2c31eaebbbdf9e83a2d3ff	Department of Geography, University of Kansas, Lawrence, KS 66045-7613, United States; Department of Agricultural Engineering, stade university Campinas, Campinas, São Paulo, brazil ;	Brunsell, N.A., Department of Geography, University of Kansas, Lawrence, KS 66045-7613, United States; Pontes, P.P.B., Department of Agricultural Engineering, State University of Campinas, Campinas, São Paulo, Brazil		accumulation rate; coffee; correlation; crop yield; MODIS; phenology; remote sensing; satellite imagery; spatial resolution; surface temperature				Barros, R.S., Mota, J.W.S., DaMatta, F.M., Maestri, M., Decline of vegetative growth in coffea arabica L. in relation to leaf temperature, water potential and stomatal conductance (1997) Field Crops Research, 54, pp. 65-72; Brunsell, N.A., Characterization of land-surface precipitation feedback regimes with remote sensing (2006) Remote Sensing of Environment, 100, pp. 200-211; Camargo, Â.P.D., Ca…	Brunsell, N. A.; Department of Geography, , Lawrence, KS 66045-7613, United States; email: brunsell@ku.edu			15481603			English	GISci. Remote Sens.	Article	Final	All Open Access, Green	Scopus	2-s2.0-76149132314
Silvero N.E.Q., Júnior J.M., Siqueira D.S., Gomes R.P., Costa M.M.	57204794658;15136439600;35225259100;57192412724;57204781910;	Sampling Density For Characterizing The Physical Quality Of A Soil Under Coffee Cultivation In Southwestern Minas Gerais	2018	Engenharia Agricola	38	5		718	727		1	10.1590/1809-4430-Eng.Agric.v38n5p718-727/2018	https://www.scopus.com/inward/record.uri?eid=2-s2.0-85057190514&doi=10.1590%2f1809-4430-Eng.Agric.v38n5p718-727%2f2018&partnerID=40&md5=5b02b4cfe24b0f0c3fc65d97a63523ba	São Paulo State University, Jaboticabal - SP, brazil ;	Silvero, N.E.Q., São Paulo State University, Jaboticabal - SP, Brazil; Júnior, J.M., São Paulo State University, Jaboticabal - SP, Brazil; Siqueira, D.S., São Paulo State University, Jaboticabal - SP, Brazil; Gomes, R.P., São Paulo State University, Jaboticabal - SP, Brazil; Costa, M.M., São Paulo State University, Jaboticabal - SP, Brazil	Coffea arabica; Geostatistics; Precision agriculture; Sampling error		To the National Scholarship Program abroad "Don Carlos Antonio López" (BECAL) for granting the scholarship to the first author, to the Council for the Improvement of Higher Education Personnel (CAPES) for granting scholarships (financial resources) to the other authors and to the farm Olho da Águia for providing the data set for this study.			Aquino, R.E., Marques Júnior, J., Campos, M.C.C., Oliveira, I.A., Siqueira, D.S., Distribuição espacial de atributos químicos do solo em área de pastagem e floresta (2014) Pesquisa Agropecuária Tropical, 44 (1), pp. 32-41. , https://dx.doi.org/10.1590/S1983-40632014000100001; Aquino, R.E., Campos, M.C.C., Marques Júnior, J., Oliveira, I.A., Mantovanelli, B.C., Soares, M.D.R., Geoestatística na av…	Silvero, N.E.Q.; São Paulo State UniversityBrazil; email: neliquinhonez92@gmail.com		Sociedade Brasileira de Engenharia Agricola	1006916			English	Eng. Agric.	Article	Final	All Open Access, Gold, Green	Scopus	2-s2.0-85057190514
Santos E.O.J., Gontijo I., Da Silva M.B., Partelli F.L.	7202143620;23984882800;36881021900;13409402500;	Sampling Design Of Soil Physical Properties In A Conilon Coffee Field	2017	Revista Brasileira de Ciencia do Solo	41		e0160426				3	10.1590/18069657rbcs20160426	https://www.scopus.com/inward/record.uri?eid=2-s2.0-85018366307&doi=10.1590%2f18069657rbcs20160426&partnerID=40&md5=a4d0b15e4b5e80d2d0000f5561dff1be	Federal University of Espírito Santo, brazil ;	Santos, E.O.J., Instituto de Defesa Agropecuária e Florestal do Espírito Santo, Pedro Canário, Espírito Santo, Brazil; Gontijo, I., Federal University of do Espírito Santo, Centro Universitário Norte do Espírito Santo, Departamento de Ciências Agrárias e Biológicas, São Mateus, Espírito Santo, Brazil; da Silva, M.B., Federal University of do Espírito Santo, Centro Universitário Norte do Espírito …	Coffea canephora; Geostatistics; Soil sampling		The authors thank the farmer Mr. Eliseu Bonomo, for allowing the implementation of the experimental area and to the Agronomic Engineer ?talo Bonomo, for the technical advisory during the research. To FAPES for the financial support.			Alvares, C.A., Stape, J.L., Sentelhas, P.C., Gonçalves, J., Sparovek, G., Koppen’s climate classification map for Brazil (2013) Meteorol Z, 22, pp. 711-728. , https://doi.org/10.1127/0941-2948/2013/0507; Amado, T., Pontelli, C.B., Santi, A.L., Viana, J., Sulzbach, L.A.S., Variabilidade espacial e temporal da produtividade de culturas sob sistema de plantio direto (2007) Pesq Agropec Bras, 42, pp.…	Gontijo, I.; Federal University of do Espírito Santo, Brazil; email: ivoney.gontijo@ufes.br		Revista Brasileira de Ciencia do Solo	1000683			English	Rev. Bras. Cienc. Solo	Article	Final	All Open Access, Gold, Green	Scopus	2-s2.0-85018366307
Carducci C.E., César De Oliveira G., Curi N., Heck R.J., Rossoni D.F.	37119913900;55787928400;7004757489;7007147373;55233793400;	Scaling Of Pores In 3D Images Of Latosols (Oxisols) With Contrasting Mineralogy Under A Conservation Management System	2014	Soil Research	52	3		231	243		10	10.1071/SR13238	https://www.scopus.com/inward/record.uri?eid=2-s2.0-84898453117&doi=10.1071%2fSR13238&partnerID=40&md5=4310a5f7924d157978b72612517b4f96	Federal University of Santa Catarina, brazil ; Federal University of Lavras, brazil; University of Guelph, Canada, stade university Maringá, brazil ;	Carducci, C.E., Federal University of Santa Catarina, Curitibanos Campus (UFSC), Curitibanos, SC 89520-000, Brazil; César De Oliveira, G., Soil Science Department of Federal University of Lavras (UFLA), Lavras, MG 37200-000, Brazil; Curi, N., Soil Science Department of Federal University of Lavras (UFLA), Lavras, MG 37200-000, Brazil; Heck, R.J., School of Environmental Science, University of Gue…	Brazil; Coffee crop; CT scan; Geostatistics; Regression models; Soil pore configuration	Computerized tomography; Crops; Minerals; Regression analysis; Soil conservation; Three dimensional; Brazil; Conservation management; Conservation tillage systems; Geo-statistics; Pore characteristics; Regression model; Soil pores; Spatial variability; Soils				Ávila, L.F., Mello, C.R., Silva, A.M., Continuidade e distribui̧cão espacial da umidade do solo em bacia hidrográfica da Serra da Mantiqueira (2010) Revista Brasileira de Engenharia Agrícola e Ambiental, 14, pp. 1257-1266. , doi:10.1590/S1415-43662010001200002; Bispo, F.H.A., Silva, A.C., Vidal-Torrado, P., Souza Junior, V.S., Highlands of the upper Jequitinhonha Valley, Brazil II-mineralogy, mic…	Carducci, C.E.; Federal University of Santa Catarina, Curitibanos Campus (UFSC), Curitibanos, SC 89520-000, Brazil; email: elocarducci@hotmail.com		CSIRO	1838675X			English	Soil Res.	Article	Final		Scopus	2-s2.0-84898453117
Santos W.J.R., Silva B.M., Oliveira G.C., Volpato M.M.L., Lima J.M., Curi N., Marques J.J.	56015395700;55256979500;55325646800;38062252600;7102069126;7004757489;23980373100;	Soil Moisture In The Root Zone And Its Relation To Plant Vigor Assessed By Remote Sensing At Management Scale	2014	Geoderma	221-222			91	95		29	10.1016/j.geoderma.2014.01.006	https://www.scopus.com/inward/record.uri?eid=2-s2.0-84897445405&doi=10.1016%2fj.geoderma.2014.01.006&partnerID=40&md5=324186230a1c30d735f9da16bf92f170	federal university of lavras, brazil; Companhia de Desenvolvimento dos Vales do São Francisco e Parnaíba, brazil ; Empresa de Pesquisa Agropecuária de Minas Gerais, brazil ;	Santos, W.J.R., Departamento de Ciência do Solo, Federal University of de Lavras-DCS/UFLA, Campus Universitário, Caixa Postal 3037, CEP, Lavras, Minas Gerais, Brazil, Companhia de Desenvolvimento dos Vales do São Francisco e Parnaíba - CODEVASF, Montes Claros, Minas Gerais, Brazil; Silva, B.M., Departamento de Ciência do Solo, Federal University of de Lavras-DCS/UFLA, Campus Universitário, Caixa …	EVI-2; Root-zone soil moisture; Soil water management; Soil-water-plant relationships	Agronomy; Crops; Linear equations; Plants (botany); Time delay; Water management; Effective depth; EVI-2; Satellite data; Soil management; Soil profiles; Soil water; Soil-water-plant relationships; Vegetation index; Soil moisture; agricultural management; coffee; remote sensing; rhizosphere; satellite data; soil depth; soil moisture; soil profile; soil water potential; vigor; Brazil; Minas Gerais…	The authors thank FAPEMIG, CNPq and CAPES for the scholarship granted to the authors; Embrapa Café and FAPEMIG for funding the project; and EPAMIG and AP Group for the logistical support and assistance on the field work.The first author thanks CODEVASF for releasing him to conclude his Ph.D. program.			(2011) Agencia Nacional de Águas - Conjuntura dos Recursos Hídricos no Brasil, , http://conjuntura.ana.gov.br/conjuntura/abr_nacional.htm, ANA; Araujo, M.A., Souza, J.L.M.D., Tsukahara, R.Y., Modelos agro-meteorológicos na estimativa da produtividade da cultura da soja na região de Ponta Grossa, Estado do Paraná (2011) Acta Sci. Agron., 33, pp. 23-31; Bernardo, S., (2006) Manual de Irrigação, , I…	Santos, W.J.R.; Departamento de Ciência do Solo, Federal University of de Lavras-DCS/UFLA, Campus Universitário, Caixa Postal 3037, CEP, Lavras, Minas Gerais, Brazil; email: walbert_santos@yahoo.com.br		Elsevier	167061		GEDMA	English	Geoderma	Article	Final		Scopus	2-s2.0-84897445405
Lense G.H.E., Moreira R.S., Bócoli F.A., Parreiras T.C., Teodoro A.E.M., Spalevic V., Mincato R.L.	57200796207;56017878300;57218198938;57211317466;57218207430;46061531300;6505869497;	Soil Organic Matter Loss By Water Erosion In A Coffee Organic Farm	2020	Agriculture and Forestry	66	2		45	50		1	10.17707/AgricultForest.66.2.04	https://www.scopus.com/inward/record.uri?eid=2-s2.0-85088254515&doi=10.17707%2fAgricultForest.66.2.04&partnerID=40&md5=49cc37e497e1b5b319d13d665a5ba1fd	Federal University of Alfenas, brazil ; Federal University of Lavras, brazil; University of Montenegro, Montenegro	Lense, G.H.E., Guilherme Henrique Expedito Lense, Rodrigo Santos Moreira, Taya Cristo Parreiras, Alexandre Elias de Miranda Teodoro, Federal University of de Alfenas - UNIFAL-MG, Alfenas, Minas Gerais, Brazil; Moreira, R.S., Guilherme Henrique Expedito Lense, Rodrigo Santos Moreira, Taya Cristo Parreiras, Alexandre Elias de Miranda Teodoro, Federal University of de Alfenas - UNIFAL-MG, Alfenas, M…	Agricultural sustainability; Kriging; RUSLE; Soil conservation; Soil losses		To the Fundação de Amparo à Pesquisa do Estado de Minas Gerais (FAPEMIG), for the scholarship offered to the first author. To the Coordenação de Aperfeiçoamento de Pessoal de Nível Superior (CAPES), for the financing of the study - Financial Code 001.	To the Funda??o de Amparo ? Pesquisa do Estado de Minas Gerais (FAPEMIG), for the scholarship offered to the first author. To the Coordena??o de Aperfei?oamento de Pessoal de N?vel Superior (CAPES), for the financing of the study-Financial Code 001.		Alvares, C.A., Stape, J.L., Sentelhas, P.C., Gonçalves, J.L.M., Sparovek, G., Köppen’s climate classification map for Brazil (2013) Meteorologische Zeitschrift, 22, pp. 711-728; Aquino, R.F., Silva, M.L.N., Freitas, D.A.F., Curi, N., Mello, C.R., Avanzi, J.C., Spatial variability of the rainfall erosivity in southern region of Minas Gerais state, Brazil (2012) Ciência e Agrotecnologia, 36, pp. 53…	Mincato, R.L.; Guilherme Henrique Expedito Lense, Brazil; email: ronaldo.mincato@unifal-mg.edu.br		University of Montenegro	5545579			English	Agric. For.	Article	Final	All Open Access, Gold	Scopus	2-s2.0-85088254515
Ferraz G.A.E.S., Da Silva F.M., Carvalho L.C.C., Alves M.D.E., Franco B.C.	55322659100;55126474900;17134352200;15047587400;55339539800;	Spatial And Temporal Variability Of Phosphorus, Potassium And Of The Yield Of A Coffee Field [Variabilidade Espacial E Temporal Do Fósforo, Potássio E Da Produtividade De Uma Lavoura Cafeeira]	2012	Engenharia Agricola	32	1		140	150		31	10.1590/S0100-69162012000100015	https://www.scopus.com/inward/record.uri?eid=2-s2.0-84865118671&doi=10.1590%2fS0100-69162012000100015&partnerID=40&md5=05cbf3f4d7f44ea0c8b909010ed13881	Federal University of Rural do Rio de Janeiro, brazil ; Federal University of Lavras, brazil; Federal University of Lavras, brazil; Federal University of Lavras, brazil; Federal University of Mato Grosso, brazil ; Federal University of Lavras, brazil;	Ferraz, G.A.E.S., Instituto de Tecnologia, Departamento de Engenharia, Federal University of Rural do Rio de Janeiro (UFRRJ), Seropédica - RJ, Doutorando em Engenharia Agrícola, Federal University of de Lavras (PPGEA/UFLA), Lavras - MG, Brazil; Da Silva, F.M., Departamento de Engenharia, Federal University of de Lavras (UFLA), Lavras - MG, Brazil; Carvalho, L.C.C., Engo Agrônomo, Mestrando em Eng…	Coffee; Geostatistic; Kriging; Precision agriculture; Semivariogram					Alves, M.C., Silva, F.M., Moraes, J.C., Pozza, E.A., Oliveira, M.S., Souza, J.C.S., Alves, L.S., Geostatistical analysis of the spatial variation of the berry borer and leaf miner in a coffee agroecosystem (2009) Precision Agriculture, Dordrecht, 10 (12), pp. 1-14. , dez; Bliska, F.M.M., Vegro, C.L.R., Afonso Júnior, P.C., Mourão, E.A.B., Cardoso, C.H.S., Custos de produção de café nas principais…	Ferraz, G.A.E.S.; Instituto de Tecnologia, Departamento de Engenharia, , Lavras - MG, Brazil; email: gabrielferraz@ufrrj.br			1006916			Portuguese	Eng. Agric.	Article	Final	All Open Access, Gold, Green	Scopus	2-s2.0-84865118671
E Silva B.S.O., Herzog T.T., Da Silva M.B., Gontijo I., Partelli F.L.	57198422052;57198436527;36881021900;23984882800;13409402500;	Spatial Distribution Of Attack Of Coffee Berry Borerin Conilon Coffee [Distribuição Espacial Do Ataque Da Broca-Do-Café No Café Conilon]	2017	Coffee Science	12	4		526	533			10.25186/cs.v12i4.1360	https://www.scopus.com/inward/record.uri?eid=2-s2.0-85036521128&doi=10.25186%2fcs.v12i4.1360&partnerID=40&md5=2d575e26550e1cedbd291eb49686f3ed	Federal University of Espírito Santo, brazil ;	e Silva, B.S.O., Federal University of do Espírito Santo/UFES, Departamento de Ciências Agrárias e Biológicas/DCAB, Campus São Mateus - Rodovia BR 101 Norte, São Mateus, ES 29.932-540, Brazil; Herzog, T.T., Federal University of do Espírito Santo/UFES, Departamento de Ciências Agrárias e Biológicas/DCAB, Campus São Mateus - Rodovia BR 101 Norte, São Mateus, ES 29.932-540, Brazil; da Silva, M.B., …	Coffea canephora; Geoestatistic; Hypothenemus hampei; Semivariogram		Nacional de Desenvolvimento Científico Tecnológico (CNPq), Fundação de Amparo à Pesquisa do Espírito Santo (FAPES), pelo apoio financeiro e ao produtor José Bonomo, pela disponibilização da área para a realização do experimento.			Alvares, C.A., Koppen’s climate classification map for Brazil (2014) Meteorologische Zeitschrift, 22 (6), pp. 711-728. , Stuttgart; Alves, M.C., Geostatistical analysis of the spatial variation of the berry borer and leaf miner in a coffee agroecosystem (2011) Precision Agriculture, 12 (1), pp. 18-31. , Dordrecht; Baker, P.S., Barreira, J.F., A field study of a population of coffee berry borer, H…			Editora UFLA	18096875			Portuguese	Coffee Sci.	Article	Final		Scopus	2-s2.0-85036521128
Silva S.A., Lima J.S.S.	25637770400;35105264900;	Spatial Estimation Of Foliar Phosphorus In Different Species Of The Genus Coffea Based On Soil Properties [Estimativa Espacial Do Fósforo Foliar Em Diferentes Espécies Do Gênero Coffea, Com Base Nas Propriedades Do Solo]	2014	Revista Brasileira de Ciencia do Solo	38	5		1439	1447		4	10.1590/S0100-06832014000500009	https://www.scopus.com/inward/record.uri?eid=2-s2.0-84908670523&doi=10.1590%2fS0100-06832014000500009&partnerID=40&md5=21472cf693527da1971db7f3ab3f0acd	State University Santa Cruz, Brazil; Federal University of Espírito Santo, brazil ;	Silva, S.A., Universidade Estadual de Santa Cruz, Rodovia Jorge Amado, km 16, Ilhéus, BA CEP 45662-900, Brazil; Lima, J.S.S., Federal University of do Espírito Santo, Alto Universitário. Caixa Postal 16, Alegre, ES CEP 29500-000, Brazil	Coffee; Cokriging; Geostatistics; Remaining P	Coffea				Amaral, J.A.T., Rena, A.B., Amaral, F.A.T., Crescimento vegetativo sazonal do cafeeiro e sua relação com fotoperíodo, frutificação, resistência estomática e fotossíntese (2006) Pesq. Agropec. Bras., 41, pp. 377-384; Bottega, E.L., Silva, S.A., Costa, M.M., Bottega, S.P., Cokrigagem na estimativa dos teores de Ca e Mg em um Latossolo Vermelho distroférrico (2011) R. Ci. Agron., 42, pp. 821-828; Ca…	Silva, S.A.; Universidade Estadual de Santa Cruz, Rodovia Jorge Amado, Brazil		Revista Brasileira de Ciencia do Solo	1000683			English	Rev. Bras. Cienc. Solo	Article	Final	All Open Access, Gold, Green	Scopus	2-s2.0-84908670523
Silva S.A., Lima J.S.S.	25637770400;35105264900;	Spatial Relationship Between The Stock Of Nutrients And Density Of A Soil Cultivated With Coffee Plants [Relação Espacial Entre O Estoque De Nutrientes E A Densidade De Solo Cultivado Com Cafeeiro]	2013	Pesquisa Agropecuaria Tropical	43	4		377	384		4	10.1590/s1983-40632013000400002	https://www.scopus.com/inward/record.uri?eid=2-s2.0-84889244382&doi=10.1590%2fs1983-40632013000400002&partnerID=40&md5=16e419238dced4360a8d4dd6208e9a4b	State University Santa Cruz, Brazil; Federal University of Espírito Santo, brazil ;	Silva, S.A., Universidade Estadual de Santa Cruz (UESC), Departamento de Ciências Agrárias e Ambientais, Ilhéus, BA, Brazil; Lima, J.S.S., Federal University of do Espírito Santo (UFES), Centro de Ciências Agrárias, Departamento de Engenharia Rural, Alegre, ES, Brazil	Coffea arabica L.; Cokriging; Precision agriculture; Soil fertility; Spatial variability	Coffea arabica				Boezio, M.N.M., Cokrigagem colocada aplicada ao mapeamento do nível de água subterrânea (2006) Revista Escola De Minas, 59 (2), pp. 159-164. , Ouro Preto; Bottega, E.L., Cokrigagem na estimativa dos teores de Ca e Mg em um Latossolo Vermelho distroférrico (2011) Revista Ciência Agronômica, 42 (3), pp. 821-828. , Fortaleza; Carvalho, J.R.P., Geoestatística na determinação da variabilidade espacial…			Federal University of De Goias (UFG)	15176398			English; Portuguese	Pesqui. Agropecu. Trop.	Article	Final	All Open Access, Gold, Green	Scopus	2-s2.0-84889244382
Gomes R.P., Campos M.C.C., Soares M.D.R., Silva D.M.P., Cunha J.M., Franciscon U., Silva L.S., Oliveira I.A., Brito W.B.M.	57192412724;15841673600;55791209500;56278388200;57196478638;57190983176;56117560100;55791582900;57196480902;	Spatial Variability Of Aggregates And Organic Carbon Under Three Different Uses Of Indian Black Earth In Southern Amazonas [Variabilidade Espacial De Agregados E Carbono Orgânico Sob Três Diferentes Usos De Terra Preta De Índio No Sul Do Amazonas]	2017	Bioscience Journal	33	6		1513	1522		5	10.14393/BJ-v33n6a2017-37142	https://www.scopus.com/inward/record.uri?eid=2-s2.0-85033565559&doi=10.14393%2fBJ-v33n6a2017-37142&partnerID=40&md5=8d4515df2fecd6895643e740a2745714	State University São Paulo, brazil ; Federal University of Amazonas, brazil ; Instituto Federal de Educação, Ciência e Tecnologia do Pará, brazil ;	Gomes, R.P., Universidade Estadual Paulista - UNESP, Jaboticabal, SP, Brazil; Campos, M.C.C., Federal University of do Amazonas -UFAM, Humaitá, AM, Brazil; Soares, M.D.R., Federal University of do Amazonas -UFAM, Humaitá, AM, Brazil; Silva, D.M.P., Federal University of do Amazonas -UFAM, Humaitá, AM, Brazil; Cunha, J.M., Federal University of do Amazonas -UFAM, Humaitá, AM, Brazil; Franciscon, U…	Aggregate classes; Land use; Soil aggregation; Spatial dependence					Alho, L.C., Campos, M.C.C., Mantovanelli, B.C., Silva, D.M.P., Souza, Z.M., Cunha, J.M., Soares, M.D.R., Physical and geospatial attributes of inceptisols and ultisols under native vegetation in Humaitá, Am, Brazil (2016) Bioscience Journal, 32 (2), pp. 422-430. , http://dx.doi.org/10.14393/BJ-v32n2a2016-32656; Alho, L.C., Campos, M.C.C., Silva, D.M.P., Mantovanelli, B.C., Souza, Z.M., Variabilid…			Federal University of de Uberlandia	15163725			English	Biosci. J.	Article	Final	All Open Access, Bronze, Green	Scopus	2-s2.0-85033565559
Valente D.S.M., De Queiroz D.M., Pinto F.A.C., Santos F.L., Santos N.T.	55081047300;6602255317;7102739792;22951558100;24463799400;	Spatial Variability Of Apparent Electrical Conductivity And Soil Properties In A Coffee Production Field	2014	Engenharia Agricola	34	6		1224	1233		5	10.1590/S0100-69162014000600017	https://www.scopus.com/inward/record.uri?eid=2-s2.0-84924161019&doi=10.1590%2fS0100-69162014000600017&partnerID=40&md5=90b3d7a77693ee074fc8d42992a76a4b	Universidade Federal de Viçosa, brazil ; Universidade Federal de Viçosa, brazil ;	Valente, D.S.M., Departamento de Engenharia Agrícola, Viçosa-MG, Brazil; de Queiroz, D.M., Departamento de Engenharia Agrícola, Viçosa-MG, Brazil; Pinto, F.A.C., Departamento de Engenharia Agrícola, Viçosa-MG, Brazil; Santos, F.L., Departamento de Engenharia Agrícola, Viçosa-MG, Brazil; Santos, N.T., Departamento de Estatística, Viçosa-MG, Brazil	Geostatistical; Management zone; Sensors					Anselin, L., Syabri, I., Kho, Y., GeoDa: An introduction to spatial data analysis (2005) Geographical Analysis, 38 (1), pp. 5-22. , Columbus; Bekele, A., Hudnall, W.H., Daigle, J.J., Prudente, J.A., Wolcott, M., Scale dependent variability of soil electrical conductivity by indirect measures of soil properties (2005) Journal of Terramechanics, 42 (3-4), pp. 339-351. , Oxford; Corwin, D.L., Lesch,…			Sociedade Brasileira de Engenharia Agricola	1006916			English	Eng. Agric.	Article	Final	All Open Access, Gold	Scopus	2-s2.0-84924161019
Da Silva F.M., De Souza Z.M., De Figueiredo C.A.P., Vieira L.H.S., De Oliveira E.	16238082300;6603234996;16238028500;35095543000;18041667600;	Spatial Variability Of Chemical Attributes And Coffee Productivity In Two Harvests [Variabilidade Espacial De Atributos Químicos E Produtividade Da Cultura Do Café Em Duas Safras Agrícolas]	2008	Ciencia e Agrotecnologia	32	1		231	241		41	10.1590/s1413-70542008000100034	https://www.scopus.com/inward/record.uri?eid=2-s2.0-61449136516&doi=10.1590%2fs1413-70542008000100034&partnerID=40&md5=9ea53ed182163842d2f8e68dedde06d7	federal university of lavras, brazil; Stade University Campinas, brazil ;	da Silva, F.M., Departamento de Engenharia/DEG, Federal University of de Lavras/UFLA, Cx. P. 3037, 37200-000 - Lavras, MG, Brazil; de Souza, Z.M., Faculdade de Engenharia Agrícola/FEAGRI, Universidade Estadual de Campinas/UNICAMP, Cx. P. 6011, 13.083-875 - Campinas, SP, Brazil; de Figueiredo, C.A.P., Departamento de Engenharia/DEG, Federal University of de Lavras/UFLA, Cx. P. 3037, 37200-000 - La…	Coffea arabica; Kriging; Oxisol; Site-specific management	Coffea arabica				Balastreire, L.A., Amaral, J.R., Leal, J.C.G., Baio, F.H.R., Agricultura de precisão: Mapeamento da produtividade de uma cultura de café (compact disc) (2001) CONGRESSO BRASILEIRO DE ENGENHARIA AGRÍCOLA, 30, , Foz do Iguaçu. Anais... Jaboticabal: SBEA 2001; Berg, M.V.D., Klamt, E., Variabilidade especial de características de solos na região do Planalto Médio, RS: II. análise da semivariância e d…	da Silva, F. M.; Departamento de Engenharia/DEG, Cx. P. 3037, 37200-000 - Lavras, MG, Brazil; email: fmsilva@ufla.br		Federal University of Lavras	14137054			Portuguese	Ciencia e Agrotecnologia	Article	Final	All Open Access, Gold, Green	Scopus	2-s2.0-61449136516
Da Silva F.M., De Souza Z.M., De Figueiredo C.A.P., Marques Jr. J., Machado R.V.	16238082300;6603234996;16238028500;55336734000;16239007600;	Spatial Variability Of Chemical Attributes And Productivity In The Coffee Cultivation [Variabilidade Espacial De Atributos Químicos E De Produtividade Na Cultura Do Café]	2007	Ciencia Rural	37	2		401	407		40	10.1590/s0103-84782007000200016	https://www.scopus.com/inward/record.uri?eid=2-s2.0-34247341803&doi=10.1590%2fs0103-84782007000200016&partnerID=40&md5=eb0db9a1b7c6f8f7ed30c0966676a480	federal university of lavras, brazil; State University São Paulo, brazil ;	Da Silva, F.M., Departamento de Engenharia, Federal University of de Lavras (UFLA), Lavras, MG, Brazil; De Souza, Z.M., Departamento de Engenharia, Federal University of de Lavras (UFLA), Lavras, MG, Brazil; De Figueiredo, C.A.P., Departamento de Engenharia, Federal University of de Lavras (UFLA), Lavras, MG, Brazil; Marques Jr., J., Departamento de Solos e Adubos, Faculdade de Ciências Agrárias …	Coffee cropping; Geostatistics; Site-specific management					BALASTREIRE, L.A. Agricultura de precisão: mapeamento da produtividade de uma cultura de café (compact disc). In: CONGRESSO BRASILEIRO DE ENGENHARIA AGRÍCOLA, 30., Foz do Iguaçu, 2001. Anais... Jaboticabal: SBEA, 2001. CD-ROM; CAMBARDELLA, C.A., Field-scale variability of soil properties in Central Iowa (1994) Soil Science Society of American Journal, 58 (5), pp. 1501-1511. , Madison, v; Companhi…	Da Silva, F.M.; Departamento de Engenharia, , Lavras, MG, Brazil; email: fmsilva@ufla.br		Federal University of de Santa Maria	1038478			Portuguese	Cienc. Rural	Article	Final	All Open Access, Gold, Green	Scopus	2-s2.0-34247341803
Silva S.A., Lima J.S.S., Xavier A.C., Teixeira M.M.	25637770400;35105264900;12805120700;15137585100;	Spatial Variability Of Chemical Attributes Of An Oxisol Under Coffee Cultivation [Variabilidade Espacial De Atributos Químicos De Um Latossolo Vermelho-Amarelo Húmico Cultivado Com Café]	2010	Revista Brasileira de Ciencia do Solo	34	1		15	22		36	10.1590/s0100-06832010000100002	https://www.scopus.com/inward/record.uri?eid=2-s2.0-77952795413&doi=10.1590%2fs0100-06832010000100002&partnerID=40&md5=9a67b455935879e2509b5598ca334b4d	Federal University of Espírito Santo, brazil ; Federal University of Espírito Santo, brazil ; Federal University of Viçosa, brazil ;	Silva, S.A., Federal University of do Espírito Santo - UFES, Caixa Postal 16, CEP 29500-000 Alegre (ES), Brazil; Lima, J.S.S., Departamento de Engenharia Rural, UFES; Xavier, A.C., Departamento de Engenharia Rural, UFES; Teixeira, M.M., Departamento de Engenharia Agrícola, Federal University of de Viçosa - UFV, Av. Peter Henry Rolfs s/n, CEP 36570-000 Viçosa (MG), Brazil	Cluster analysis; Kriging; Principal components	Coffea arabica				Bueno, B.F., (2001) Aplicação De Técnicas Multivariadas Em Mapeamento E Interpretação De Parâmetros Do Solo, p. 84. , Campinas, Universidade Estadual de Campinas, Tese de Mestrado; Cambardella, C.A., Moorman, T.B., Novak, J.M., Parkin, T.B., Karlen, D.L., Turco, R.F., Konopka, A.E., Field-scale variability of soil properties in Central Iowa soils (1994) Soil Sci. Soc. Am. J, 58, pp. 1501-1511; Co…	Silva, S. A.; Federal University of do Espírito Santo - UFES, Caixa Postal 16, CEP 29500-000 Alegre (ES), Brazil; email: samuel-assis@hotmail.com		Revista Brasileira de Ciencia do Solo	1000683			Portuguese	Rev. Bras. Cienc. Solo	Article	Final	All Open Access, Gold, Green	Scopus	2-s2.0-77952795413
Costa J.O., Coelho R.D., Wolff W., José J.V., Folegatti M.V., Ferraz S.F.B.	57195323170;14622209800;57194393204;51663442500;15135674000;6507946980;	Spatial Variability Of Coffee Plant Water Consumption Based On The Sebal Algorithm	2019	Scientia Agricola	76	2		93	101		16	10.1590/1678-992x-2017-0158	https://www.scopus.com/inward/record.uri?eid=2-s2.0-85061503890&doi=10.1590%2f1678-992x-2017-0158&partnerID=40&md5=caa5508ad843299725a941af0007b8d2	University of São Paulo, Brazil; Federal University of Mato Grosso, brazil ; University of São Paulo, Brazil;	Costa, J.O., Universidade de São Paulo/ESALQ, Depto. de Engenharia de Biossistemas, Av. Pádua Dias, 11, Piracicaba, SP 13418-900, Brazil; Coelho, R.D., Universidade de São Paulo/ESALQ, Depto. de Engenharia de Biossistemas, Av. Pádua Dias, 11, Piracicaba, SP 13418-900, Brazil; Wolff, W., Universidade de São Paulo/ESALQ, Depto. de Engenharia de Biossistemas, Av. Pádua Dias, 11, Piracicaba, SP 13418…	Crop coefficient; Evapotranspiration; Satellite		LANDSAT data from USGS used in this study are acknowledged. This study was financed in part by the Coordenação de Aperfeiçoamento de Pessoal de Nível Superior-Brazil (CAPES)-Finance Code 001. We are thank also to the Conselho Nacional de Desenvolvimento Científico e Tecnológico (CNPq), the Fundação de Amparo à Pesquisa do Estado de São Paulo (FAPESP) and the Fundação de Estudos Agrários Luiz de Q…			Allen, R.G., Pereira, L.S., Raes, D., Smith, M., (1998) Crop Evapotranspiration: Guidelines for Computing Crop Water Requirements, 56. , FAO, Rome, Italy. (Irrigation and Drainage Paper; Allen, R.G., Tasumi, M., Trezza, R., Satellite-based energy balance for mapping evapotranspiration with internalized calibration (METRIC)-model (2007) Journal of Irrigation and Drainage Engineering, 133, pp. 380-…	Costa, J.O.; Universidade de São Paulo/ESALQ, Av. Pádua Dias, 11, Brazil; email: costajo@usp.br		Scientia Agricola	1039016			English	Sci. Agric.	Article	Final	All Open Access, Gold, Green	Scopus	2-s2.0-85061503890
Sentelhas P.C., Gillespie T.J., Batzer J.C., Gleason M.L., Monteiro J.E.B.A., Pezzopane J.R.M., Pedro Jr. M.J.	6505801855;35120176700;6506496117;7005199896;7103134372;6506835046;55950247000;	Spatial Variability Of Leaf Wetness Duration In Different Crop Canopies	2005	International Journal of Biometeorology	49	6		363	370		45	10.1007/s00484-005-0259-1	https://www.scopus.com/inward/record.uri?eid=2-s2.0-23644452131&doi=10.1007%2fs00484-005-0259-1&partnerID=40&md5=f811d12b8bd37d851137a75e948ae58e	University of São Paulo, Brazil; University of Guelph, Canada, Iowa State University, United States; University of São Paulo, Brazil; Agronomic Institute of Campinas, brazil ;	Sentelhas, P.C., Agrometeorology Group, Department of Exact Sciences, University of São Paulo, P.O. Box 9, 13418-900 Piracicaba, SP, Brazil; Gillespie, T.J., Department of Land Resource Science, Ontario Agricultural College, University of Guelph, Guelph, Ont. N1G 2W1, Canada; Batzer, J.C., Department of Plant Pathology, Iowa State University, Ames, IA 50011, United States; Gleason, M.L., Departme…	Dew; Microclimate; Plant disease; Rainfall; Warning systems	water; apple; article; cantaloupe; coffee; crop; environmental monitoring; grape; maize; microclimate; plant leaf; regression analysis; weather; Coffea; Crops, Agricultural; Cucumis melo; Environmental Monitoring; Malus; Microclimate; Plant Leaves; Regression Analysis; Vitis; Water; Weather; Zea mays; Malus x domestica; Poaceae; Vitaceae; Vitis sp.; Zea mays	Acknowledgements This project was funded in part by a fellowship to the first author from CNPq, a Brazilian Government Institution (Proc. 202536/02-5), and by the United States Department of Agriculture. The first and sixth authors are supported by a fellowship from CNPq and the fourth and fifth from FAPESP. The authors wish to thank two anonymous reviewers for their constructive criticism and he…			Chtioui, Y., Panigrahi, S., Francl, L., A generalized regression neural network and its application for leaf wetness prediction to forecast plant disease (1999) Chem Intel Lab Syst, 48, pp. 47-58; Francl, L.J., Panigrahi, S., Artificial neural network models of wheat leaf wetness (1997) Agric for Meteorol, 88, pp. 57-65; Gillespie, T.J., Barr, A., Adaptation of a dew estimation scheme to a new cr…	Sentelhas, P.C.; Agrometeorology Group, P.O. Box 9, 13418-900 Piracicaba, SP, Brazil; email: pcsentel@esalq.usp.br			207128		IJBMA	English	Int. J. Biometeorol.	Article	Final		Scopus	2-s2.0-23644452131
Lima J.S.S., De Oliveira R.B., Silva S.A.	35105264900;15047730700;25637770400;	Spatial Variability Of Particle Size Fractions Of An Oxisol Cultivated With Conilon Coffee	2012	Revista Ceres	59	6		867	872		4	10.1590/S0034-737X2012000600018	https://www.scopus.com/inward/record.uri?eid=2-s2.0-85016556221&doi=10.1590%2fS0034-737X2012000600018&partnerID=40&md5=17768c662e8f6ea92ebacbeed9761844	Federal University of Espírito Santo, brazil ; Universidade Paranaense, brazil ; Federal University of Viçosa, brazil ;	Lima, J.S.S., Departamento de Engenharia Rural, Federal University of do Espírito Santo, Campus Alegre, Bairro Universitário, s/n, Alegre, Espírito Santo, 29500-000, Brazil; de Oliveira, R.B., Instituto de Ciências Exatas, Universidade Paranaense, Campus l, Praça Mascarenhas de Moraes, 4282, Umuarama, Paraná, 87505-090, Brazil; Silva, S.A., Doutorando do Departamento de Engenharia Agrícola, Feder…	Erosion; Erosão; Geoestatística; Geostatistic; Manejo do solo; Soil management		The authors thank CNPq for the productivity scholarship granted to the first author, and FAPES for the resources for the research.			Cambardella, C.A., Moorman, T.B., Novack, J.M., Parkin, T.B., Karlen, D.L., Turco, R.F., Knopka, A.E., Field-scale variability of soil proprieties in central Iowa soils (1994) Soil Science Society America Journal, 58, pp. 1240-1248; Campos, M.C.C., Marques Junior, J., Pereira, G.T., Montanari, R., Siqueira, D.S., Variabilidade espacial da textura de solos de diferentes materiais de origem em Pere…	Lima, J.S.S.; Departamento de Engenharia Rural, Campus Alegre, Bairro Universitário, s/n, Brazil; email: limajss@yahoo.com.br		Federal University of de Vicosa	0034737X			English	Rev. Ceres	Article	Final	All Open Access, Gold, Green	Scopus	2-s2.0-85016556221
Rezende F.C., Ribeiro V.B., Ávila L.F., De Faria M.A., Da Silva E.L.	16317341000;53880285300;35224456400;55941996800;16021250200;	Spatial Variability Of Ph In Coffee Plants Under Fertigation And Traditional System Of Fertilizing [Variabilidade Espacial Do Ph Em Área Com Cafeeiro Fertirrigado E Sistema Tradicional]	2012	Coffee Science	7	3		198	207				https://www.scopus.com/inward/record.uri?eid=2-s2.0-84867424197&partnerID=40&md5=dd821df64c7b30ec70f9627aaa4ee990	federal university of lavras, brazil;	Rezende, F.C., Federal University of de Lavras/UFLA, Departamento de Engenharia/DEG, Cx. P. 3037, 37.200-000, Lavras - MG, Brazil; Ribeiro, V.B., Federal University of de Lavras/UFLA, Departamento de Engenharia/DEG, Cx. P. 3037, 37.200-000, Lavras - MG, Brazil; Ávila, L.F., Federal University of de Lavras/UFLA, Departamento de Engenharia/DEG, Cx. P. 3037, 37.200-000, Lavras - MG, Brazil; de Faria…	Coffea arabica L; Drip irrigation; Geostatistics; Nutrients; pH					Avila, L.F., Mello, C.R., Silva, A.M., Continuidade e distribuição espacial da umidade do solo numa bacia hidrográfica da Serra da Mantiqueira (2010) Revista Brasileira De Engenharia Agrícola E Ambiental, 14 (12), pp. 1257-1266. , Campina Grande; Ayers, R.S., Westcott, D.W., A Qualidade Da Água Na Agricultura (1991), p. 218. , Campina Grande: UFPB, FAO. Estudos de Irrigação e Drenagem, 29; Bergez…	Rezende, F. C.; Federal University of de Lavras/UFLA, Cx. P. 3037, 37.200-000, Lavras - MG, Brazil; email: frezende@deg.ufla.br			18096875			English; Portuguese	Coffee Sci.	Article	Final		Scopus	2-s2.0-84867424197
Simões W.L., Da Silva É.L., De Lima D.M., De Oliveira M.S.	16022777400;16021250200;16021335400;12804341400;	Spatial Variability Of Physical Attributes Of A Dystroferric Red Latosol Under Different Managements [Variabilidade Espacial De Atributos Físicos De Um Latossolo Vermelho Distroférrico, Submetido A Diferentes Manejos]	2006	Revista Brasileira de Ciencia do Solo	30	6		1061	1068		5	10.1590/s0100-06832006000600015	https://www.scopus.com/inward/record.uri?eid=2-s2.0-33847298683&doi=10.1590%2fs0100-06832006000600015&partnerID=40&md5=4d4869eef4689ebb5e4bdd19129d5cd8	Federal University of Viçosa, brazil ; Federal University of Lavras, brazil; Federal University of Viçosa, brazil ; Federal University of Lavras, brazil;	Simões, W.L., Departamento de Engenharia Agrícola, Federal University of de Viçosa - UFV, Bolsista CNPq, CEP 36.570-000 Viçosa-(MG), Brazil; Da Silva, É.L., Departamento de Engenharia Agrícola, Federal University of de Lavras - UFLA, Caixa Postal 37, CEP 37.200-000 Lavras (MG), Brazil; De Lima, D.M., Departamento de Solos, UFV, Brazil; De Oliveira, M.S., Departamento de Ciências Exatas, UFLA, Bra…	Geostatistics; Kriging; Soil management					BERTOL, I., ALBUQUERQUE, J.A., LEITE, D., AMARAL, A.J., ZOLDAN Jr., W.A., Propriedades fisicas do solo sob preparo convencional e semeadura direta em rotação e sucessão de culturas, comparadas às do campo nativo (2004) R. Bras. Ci. Solo, 28, pp. 155-163; CAMBARDELLA, C.A., MOORMAN, T.B., NOVAK, J.M., PARKIN, T.B., KARLEN, D.L., TURCO, R.F., KONOPKA, A.E., Field-scale variability of soil propertie…	Simões, W.L.; Departamento de Engenharia Agrícola, , CEP 36.570-000 Viçosa-(MG), Brazil; email: welsimoes@yahoo.com.br		Revista Brasileira de Ciencia do Solo	1000683			Portuguese	Rev. Bras. Cienc. Solo	Article	Final	All Open Access, Gold, Green	Scopus	2-s2.0-33847298683
Mota P.C., Jr., Costa Campos M.C., Mantovanelli B.C., Franciscon U., Da Cunha J.M.	57194493508;15841673600;56483317800;57190983176;57196478638;	Spatial Variability Of Physical Attributes Of The Soil In Amazonian Black Soil Under Coffee Cultivation [Variabilidade Espacial De Atributos Físicos Do Solo Em Terra Preta De Índio Sob Cultivo De Café Conilon]	2017	Coffee Science	12	2		113	124		1		https://www.scopus.com/inward/record.uri?eid=2-s2.0-85020436931&partnerID=40&md5=bd10496f1b1d6dec6c82f85f00114d71	Federal University of Amazonas, brazil ; Federal University of Amazonas, brazil ; Federal University of Santa Maria, brazil ; Federal University of Amazonas, brazil ;	Mota, P.C., Jr., Federal University of do Amazonas/UFAM, Instituto de Educação Agricultura e Ambiente, Campus de Humaitá - Departamento de Engenharia Ambiental, Cx.P. 2314, Humaitá, AM, 69.800-000, Brazil; Costa Campos, M.C., Federal University of do Amazonas/UFAM, Instituto de Educação Agricultura e Ambiente, Campus de Humaitá - Departamento de Agronomia/DEPA, Cx. P. 2314, Humaitá, AM, 69.800-00…	Geostatistics; Management; Semivariogram staggered; Soil properties; TPI					Aquino, R.E., Geoestatística na avaliação dos atributos físicos em Latossolo sob floresta nativa e pastagem na região de Manicoré, Amazonas (2014) Revista Brasileira de Ciência do Solo, 38, pp. 397-406. , Viçosa; Secretaria de Estado do Meio Ambiente e Desenvolvimento Sustentável (2004) Relatório técnico síntese dos diagnósticos: Área estadual Sul de Apuí e Manicoré, , Manaus; Araújo, M.A., Torme…			Editora UFLA	18096875			Portuguese	Coffee Sci.	Article	Final		Scopus	2-s2.0-85020436931
Burak D.L., Santos D.A., Passos R.R.	36518350200;36495554000;23111352800;	Spatial Variability Of Physical Properties: Relationship With Relief, Organic Matter And Productivity In Conilon Coffee [Variabilidade Espacial De Atributos Físicos: Relação Com Relevo, Matéria Orgânica E Produtividade Em Café Conilon]	2016	Coffee Science	11	4		455	466		1		https://www.scopus.com/inward/record.uri?eid=2-s2.0-85016517535&partnerID=40&md5=77f8056f738ed099d27c78d1b30886b0	Federal University of Espírito Santo, brazil ;	Burak, D.L., Federal University of do Espírito Santo, Centro de Ciências Agrárias e Engenharias, Campus Alegre-Departamento de Produção Vegetal, Alegre, ES 29.500-000, Brazil; Santos, D.A., Federal University of do Espírito Santo, Centro de Ciências Agrárias e Engenharias, Campus Alegre-Departamento de Produção Vegetal, Alegre, ES 29.500-000, Brazil; Passos, R.R., Federal University of do Espírit…	Geoestatistical; Humic substances; Multivariate analysis; Soil physics		? CAPES pelo aux?lio financeiro junto ao Programa Nacional de P?s Doutorado/ PNPD e ao INCAPER pela concess?o da ?rea de estudo			Aguilar, C., Herrero, J., Polo, M.J., Topographic effects on solar radiation distribution in mountainous watersheds and their influence on reference evapotranspiration estimates at watershed scale (2010) Hydrology Earth System Sciences, Göttingen, 14 (12), pp. 2479-2794; Almeida, D.A.S., Guimarães, E.C., Geoestatística e análise fatorial exploratória para representação espacial de atributos quími…			Editora UFLA	18096875			Portuguese	Coffee Sci.	Article	Final		Scopus	2-s2.0-85016517535
Ferraz G.A.S., Da Silva F.M., De Oliveira M.S., Custódio A.A.P., Ferraz P.F.P.	55322659100;55126474900;12804341400;54884454200;56421977300;	Spatial Variability Of Plant Attributes In A Coffee Plantation [Variabilidade Espacial Dos Atributos Da Planta De Uma Lavoura Cafeeira]	2017	Revista Ciencia Agronomica	48	1		81	91		10	10.5935/1806-6690.20170009	https://www.scopus.com/inward/record.uri?eid=2-s2.0-85009784488&doi=10.5935%2f1806-6690.20170009&partnerID=40&md5=0679242abbef598907964ea0a6226388	federal university of lavras, brazil; Federal University of Lavras, brazil; Instituto Agronômico do Paraná, brazil ;	Ferraz, G.A.S., Departamento de Engenharia, Federal University of de Lavras, Caixa Postal 3037, Lavras-MG, 37.200-000, Brazil; da Silva, F.M., Departamento de Engenharia, Federal University of de Lavras, Caixa Postal 3037, Lavras-MG, 37.200-000, Brazil; de Oliveira, M.S., Departamento de Ciências Exatas, Federal University of de Lavras, Caixa Postal 3037, Lavras-MG, 37.200-000, Brazil; Custódio, …	Coffee plant; Geostatistics; Management; Precision agriculture					Alves, M.C., Geostatistical analysis of the spatial variation of the berry borer and leaf miner in a coffee agroecosystem (2009) Precision Agriculture, 10 (12), pp. 1-14; Alves, M.C., Neuro-fuzzy operational performance of a coffee harvester machine (2009) Journal of Convergence Information Technology, 4 (2), pp. 52-59; Bachmaier, M., Backers, M., Variogram or semivariogram? Understanding the var…	Ferraz, G.A.S.; Departamento de Engenharia, Caixa Postal 3037, Brazil; email: gabriel.ferraz@deg.ufla.br		Federal University of do Ceara	456888			Portuguese	Rev. Cienc. Agron.	Article	Final	All Open Access, Gold, Green	Scopus	2-s2.0-85009784488
Santos E.O.J., Gontijo I., Da Silva M.B.	7202143620;23984882800;36881021900;	Spatial Variability Of Soil Acidity Attributes And Liming Requirement For Conilon Coffee [Variabilidade Espacial Dos Atributos De Acidez Do Solo E Necessidade De Calagem Para Café Conilon]	2014	Coffee Science	9	2		275	283		4		https://www.scopus.com/inward/record.uri?eid=2-s2.0-84902073696&partnerID=40&md5=f8bbb53e95555f2c0c46b6843837f728	Federal University of Espírito Santo, brazil ;	Santos, E.O.J., Federal University of do Espírito Santo/UFES, Centro Universitário Norte do Espírito Santo/CEUNES, Departamento de Ciências Agrárias e Biológicas/DCAB, 29.9932, São Mateus, ES, Brazil; Gontijo, I., Federal University of do Espírito Santo/UFES, Centro Universitário Norte do Espírito Santo/CEUNES, Departamento de Ciências Agrárias e Biológicas/DCAB, 29.9932, São Mateus, ES, Brazil; …	Coffea conephora; Geostatistics; Spatial distribution					Barbieri, D.M., Marques Júnior, J., Pereira, G.T., Variabilidade espacial de atributos químicos de um Argissolo para a aplicação de insumos à taxa variável em diferentes formas de relevo. Engenharia Agrícola (2008) Jaboticabal, 28 (4), pp. 645-653; Cambardella, C.A., Moornam, T.B., Novak, J.M., Parkin, T.B., Karlen, D.L., Turco, R.F., Konopka, A.E.E., Field-scale variability of soil properties in…			Editora UFLA	18096875			English; Portuguese	Coffee Sci.	Article	Final		Scopus	2-s2.0-84902073696
Da Silva A.F., Lima J.S.S., De Souza G.S., De Oliveira R.B.	36247099300;35105264900;25636830500;15047730700;	Spatial Variability Of Soil Chemical Attributes In Arabica Coffee (Coffea Arabica L.) Fields Under Different Management Systems [Variabilidade Espacial De Atributos Químicos Do Solo Cultivado Com Café Arábica (Coffea Arabica L.) Sob Diferentes Manejos]	2010	Coffee Science	5	2		173	182		8		https://www.scopus.com/inward/record.uri?eid=2-s2.0-80055116128&partnerID=40&md5=6e5d4e51884dbeaf981c698bd206449c	State University São Paulo, brazil ; Federal University of Espírito Santo, brazil ; University of Campinas, Brazil; State University São Paulo, brazil ;	da Silva, A.F., Faculdade de Ciências Agronômicas, Departamento de Solos, Universidade Estadual Paulista-SP, Rua José Barbosa de Barros-1780-Cx. P. 237, 18610-307-Botucatu, SP, Brazil; Lima, J.S.S., Centro de Ciências Agrárias, Depto Eng. Rural, Federal University of do Espírito Santo, Alto universitário-Cx. P. 16, 29500-000-Alegre, ES, Brazil; de Souza, G.S., Faculdade de Engenharia Agrícola/UNI…	Geographic Information System; Geostatistics; Organic management	Coffea arabica				Azevedo, E.C., (2004) Uso da geoestatística e de recursos de geoprocessamento no diagnóstico da degradação de um solo argiloso sob pastagem no estado de Mato Grosso, p. 157. , Tese (Doutorado em Engenharia Agrícola)-Faculdade de Engenharia Agrícola, Campinas, 2004; Bachmaier, M., Backes, M., Variogram or semivariogram?: Understanding the variances in a variogram (2008) Precision Agriculture, 9 (3…	da Silva, A. F.; Faculdade de Ciências Agronômicas, Rua José Barbosa de Barros-1780-Cx. P. 237, 18610-307-Botucatu, SP, Brazil; email: alefagioli@hotmail.com			18096875			English; Portuguese	Coffee Sci.	Article	Final		Scopus	2-s2.0-80055116128
Burak D.L., Passos R.R., Andrade F.V.	36518350200;23111352800;7005816402;	Spatial Variability Of Soil Chemical Attributes In Conilon Coffee Plantation: Relationships With Soil Texture, Organic Matter And Relief [Variabilidade Espacial De Atributos Químicos Do Solo Sob Cafeeiro Conilon: Relação Com Textura, Matéria Orgânica E Relevo]	2012	Bragantia	71	4		538	547		6	10.1590/S0006-87052012000400012	https://www.scopus.com/inward/record.uri?eid=2-s2.0-84873545015&doi=10.1590%2fS0006-87052012000400012&partnerID=40&md5=1799136e7550282a2af11c2225cccaf7	Federal University of Espírito Santo, brazil ;	Burak, D.L., Federal University of do Espírito Santo, Centro de Ciências Agrárias, Departamento de Produção Vegetal, Alto Universitário, s/n, 29500-000 Alegre, ES, Brazil; Passos, R.R., Federal University of do Espírito Santo, Centro de Ciências Agrárias, Departamento de Produção Vegetal, Alto Universitário, s/n, 29500-000 Alegre, ES, Brazil; Andrade, F.V., Federal University of do Espírito Santo…	Geomorphologic attributes; Geostatistical analysis; Principal component analysis; Soil attributes; Soil fertility	coffee; geomorphological mapping; geostatistics; granulometry; humic acid; plantation; principal component analysis; soil chemistry; soil depth; soil fertility; soil organic matter; soil texture; spatial variation				Mládková, L., Penížek, V., Drábek, O., Vašát, R., Forest soil acidification assessment using principal component analysis and geostatistics (2007) Geoderma, 140, pp. 374-382; Cambardella, C.A., Moorman, T.B., Novak, J.M., Parkin, T.B., Karlen, D.L., Turco, R.F., Konopka, A.E., Field-scale variability of soil properties in Central Iowa Soils (1994) Soil Science Society of American Journal, 58, pp.…	Burak, D. L.; Federal University of do Espírito Santo, Alto Universitário, s/n, 29500-000 Alegre, ES, Brazil; email: diego.burak@ufes.br			68705			English; Portuguese	Bragantia	Article	Final	All Open Access, Gold	Scopus	2-s2.0-84873545015
Vieira S.R., Filho O.G., Chiba M.K., Cantarella H.	7102450049;35336335800;26031896100;6603256586;	Spatial Variability Of Soil Chemical Properties After Coffee Tree Removal [Variabilidade Espacial Dos Atributos Químicos Do Solo Após Remoção De Cafezal]	2009	Revista Brasileira de Ciencia do Solo	33	5		1507	1514		7	10.1590/s0100-06832009000500041	https://www.scopus.com/inward/record.uri?eid=2-s2.0-75349110191&doi=10.1590%2fs0100-06832009000500041&partnerID=40&md5=ee7f4b3406c655b19a21172a06d9a77d	Instituto Agronômico, brazil ; Instituto Agronômico, brazil ;	Vieira, S.R., Instituto Agronômico - IAC, Caixa Postal 28, CEP 13020-902 Campinas (SP), Brazil; Filho, O.G., Agricultura Tropical e Subtropical, IAC, Brazil; Chiba, M.K., Instituto Agronômico - IAC, Caixa Postal 28, CEP 13020-902 Campinas (SP), Brazil; Cantarella, H., Instituto Agronômico - IAC, Caixa Postal 28, CEP 13020-902 Campinas (SP), Brazil	Geostatistics; Semivariogram; Soil fertility; Traditional management					Caires, E.F., Banzatto, D.A., Fonseca, A.F., Calagem na superfície em sistema plantio direto (2001) R. Bras. Ci. Solo, 24, pp. 161-164; Cambardella, C.A., Mooman, T.B., Novak, J.M., Parkin, T.B., Karlen, D.L., Turv, R.F., Konopa, A.E., Field scale variability of soil properties in central Iowa soil (1994) Soil Sci. Soc. Am. J, 47, pp. 1501-1511; Carvalho, J.R.P., Silveira, P.M., Vieira, S.R., Geo…	Vieira, S. R.; Instituto Agronômico - IAC, Caixa Postal 28, CEP 13020-902 Campinas (SP), Brazil; email: sidney@iac.sp.gov.br		Revista Brasileira de Ciencia do Solo	1000683			Portuguese	Rev. Bras. Cienc. Solo	Article	Final	All Open Access, Gold	Scopus	2-s2.0-75349110191
Rezende F.C., Ribeiro V.B., Ávila L.F., De Faria M.A., De Mello C.R.	16317341000;53880285300;35224456400;55941996800;57218102064;	Spatial Variability Of Soil Electrical Conductivity In An Area With Coffee (Coffea Arabica L.) Fertilized Via Fertirrigation And Traditional System [Variabilidade Espacial Da Condutividade Elétrica Em Área Com Cafeeiro (Coffea Arabica L.) Adubado Via Fertirrigação E Sistema Tradicional]	2010	Coffee Science	6	1		55	64		1		https://www.scopus.com/inward/record.uri?eid=2-s2.0-80054984930&partnerID=40&md5=7ddeba77f67c7eb2644ee91cbd54505a	federal university of lavras, brazil; Federal University of Lavras, brazil; Federal University of Lavras, brazil; Federal University of Lavras, brazil; Federal University of Lavras, brazil;	Rezende, F.C., Eng. Agric. DS Irrigação e Drenagem, Departamento de Engenharia/UFLA, Campus Universitário, Caixa Postal 3037, Lavras/MG, Brazil; Ribeiro, V.B., Aluno Curso de Eng, Agrícola da UFLA, Brazil; Ávila, L.F., Departamento de Engenharia da UFLA, Brazil; de Faria, M.A., Irrigação e Drenagem, Departamento de Engenharia da UFLA, Brazil; de Mello, C.R., Ciência do solo, Departamento de Engen…	Drip; Irrigation; Salinity	Coffea arabica				(2010) Anuário Da Agricultura Brasileira, , AGRIANUAL, São Paulo: FNP Consultoria em Comércio; Avila, L.F., Mello, C.R., Silva, A.M., Continuidade e distribuição espacial da umidade do solo numa bacia hidrográfica da Serra da Mantiqueira (2010) Revista Brasileira De Engenharia Agrícola E Ambiental, , Campina Grande, No prelo; Bohn, H.L., McNeal, B.L., O'Connor, G.A., (1985) Soil Chemistry, p. 341…	Rezende, F. C.; Eng. Agric. DS Irrigação e Drenagem, Caixa Postal 3037, Lavras/MG, Brazil; email: rezende@deg.ufla.br			18096875			English; Portuguese	Coffee Sci.	Article	Final		Scopus	2-s2.0-80054984930
Ferraz G.A.S., Avelar R.C., Bento N.L., Souza F.R., Ferraz P.F.P., Damasceno F.A., Barbari M.	55322659100;56378435200;57212193055;57212541092;56421977300;26423473600;14420748600;	Spatial Variability Of Soil Fertility Attributes And Productivity In A Coffee Crop Farm	2019	Agronomy Research	17	4		1630	1638		1	10.15159/AR.19.142	https://www.scopus.com/inward/record.uri?eid=2-s2.0-85076176966&doi=10.15159%2fAR.19.142&partnerID=40&md5=5c2d9ba02e1859b86a304642be85b834	federal university of lavras, brazil; Avelar Consultoria, brazil ; Federal Rural University of Rio de Janeiro, brazil ; Università degli Studi di Firenze, Italy;	Ferraz, G.A.S., Federal University of Lavras – UFLA, Departament of Agricultural Engineering, University Campus, Lavras, MG 37200-000, Brazil; Avelar, R.C., AVELAR ASSESSORIA LTDA-Consultoria em Cafeicultura, Monte Carmelo, MG, Brazil; Bento, N.L., Federal University of Lavras – UFLA, Departament of Agricultural Engineering, University Campus, Lavras, MG 37200-000, Brazil; Souza, F.R., Federal Ru…	Geostatistics; Precision coffee cultivation; Semivariograms; Spatial maps					Alvares, C.A., Stape, J.L., Sentelhas, P.C., de Moraes, G., Leonardo, J., Sparovek, G., Köppen's climate classification map for Brazil (2013) Meteorologische Zeitschrift, 22 (6), pp. 711-728; Alvarez, V.H., Novais, R.F., Barros, N.F., Cantarutti, R.B., Lopes, A.S., Interpretation of soil analysis results (1999) Recommendations for the Use of Correctives and Fertilizers in Minas Gerais: 5Th Approa…	Ferraz, G.A.S.; Federal University of Lavras – UFLA, University Campus, Brazil; email: gabriel.ferraz@ufla.br		Eesti Pollumajandusulikool	1406894X			English	Agron. Res.	Article	Final		Scopus	2-s2.0-85076176966
Andrade A.D., Faria R.O., Alonso D.J.C., E Silva Ferraz G.A., Herrera M.A.D., Da Silva F.M.	57189248281;57204332481;57204036429;55322659100;57204319430;55126474900;	Spatial Variability Of Soil Penetration Resistanacnder In Coffee Growing [Variabilidade Espacial Da Resistência Do Solo À Penetração Na Cafeicultura]	2018	Coffee Science	13	3		341	348		1	10.25186/cs.v13i3.1456	https://www.scopus.com/inward/record.uri?eid=2-s2.0-85055199467&doi=10.25186%2fcs.v13i3.1456&partnerID=40&md5=fc1be08f3c89f0e97c2ee9c60cf754a2	federal university of lavras, brazil; Universidade SurColombia; na, Colombia;	Andrade, A.D., Federal University of de Lavras/UFLA, Departamento de Engenharia/DEG, Cx. P. 3037, Lavras, MG 37.200-000, Brazil; Faria, R.O., Federal University of de Lavras/UFLA, Departamento de Engenharia/DEG, Cx. P. 3037, Lavras, MG 37.200-000, Brazil; Alonso, D.J.C., Federal University of de Lavras/UFLA, Departamento de Engenharia/DEG, Cx. P. 3037, Lavras, MG 37.200-000, Brazil; E Silva Ferra…	Coffea arabica; Penetrometer; Precision agriculture; Soil compaction					Beutler, A.N., Resistência à penetração e permeabilidade de Latossolo Vermelho distrófico típico sob sistemas de manejo na região dos cerrados (2001) Revista Brasileira De Ciência Do Solo, 25 (1), pp. 167-177. , Viçosa, Jan/Mar; Bottega, E.L., Variabilidade espacial da resistência do solo à penetração em um Latossolo Vermelho distroférrico (2011) Revista Brasileira De Ciências Agrárias, 6 (2), pp…			Editora UFLA	18096875			English	Coffee Sci.	Article	Final	All Open Access, Bronze, Green	Scopus	2-s2.0-85055199467
Carvalho L.C.C., Da Silva F.M., Ferraz G.A.S., Da Silva F.C., Stracieri J.	17134352200;55126474900;55322659100;55969247100;56010186200;	Spatial Variability Of Soil Physical Attributes And Agronomic Characteristics Of Coffee Crop [Variabilidade Espacial De Atributos Físicos Do Solo E Características Agronômicas Da Cultura Do Café]	2013	Coffee Science	8	3		265	275		10		https://www.scopus.com/inward/record.uri?eid=2-s2.0-84892757522&partnerID=40&md5=c993bd146e8d05fb73859e3b9aaf8e81	federal university of lavras, brazil; Federal University of Lavras, brazil; Federal University of Rural do Rio de Janeiro, brazil ; Federal University of Fluminense, brazil ; State University São Paulo, brazil ;	Carvalho, L.C.C., Federal University of de Lavras /UFLA, Departamento de Engenharia/DEG, Cx. P. 3037, 37.200-000-Lavras-MG, Brazil; Da Silva, F.M., Federal University of de Lavras /UFLA, Departamento de Engenharia/DEG, Cx. P. 3037, 37.200-000 Lavras, MG, Brazil; Ferraz, G.A.S., Federal University of Rural do Rio de Janeiro/UFRRJ, Instituto de Tecnologia-Departamento de Engenharia,(IT/DE), Rodovia…	Arabica coffee; Geostatistics; Precision agriculture; Soil physics					Amaro, F.J., Amostragem e variabilidade espacial de atributos físicos de um LATOSSOLO VERMELHO em Mossoró, RN (2007) Revista Brasileira De Ciência Do Solo, 31 (3), pp. 415-422. , Viçosa, MG, jun; Soil cone prenetrometer (1999) ASAE Standards 1999: Standards Enginnering Practices Data, pp. 834-835. , AMERICAN SOCIETY OF AGRICULTURAL ENGINEERS, 46th ed. Saint Joseph; Andrade, A.R.S., Variabilidade …	Federal University of de Lavras /UFLA, Cx. P. 3037, 37.200-000-Lavras-MG, Brazil			18096875			English; Portuguese	Coffee Sci.	Article	Final		Scopus	2-s2.0-84892757522
Benedito Mendes Brito W., Costa Campos M.C., Campos Mantovanelli B., Da Cunha J.M., Franciscon U., Rodrigues Soares M.D.	57196480902;15841673600;56483317800;57196478638;57190983176;57193411199;	Spatial Variability Of Soil Physical Properties In Archeological Dark Earths Under Different Uses In Southern Amazon	2018	Soil and Tillage Research	182			103	111		10	10.1016/j.still.2018.05.008	https://www.scopus.com/inward/record.uri?eid=2-s2.0-85047159645&doi=10.1016%2fj.still.2018.05.008&partnerID=40&md5=aee0143ab838a9776c690c3ecd2afa34	Federal University of Amazonas, brazil ; Federal University of Santa Maria, brazil ;	Benedito Mendes Brito, W., Federal University of Amazonas, UFAM, Humaitá, Amazonas, Brazil; Costa Campos, M.C., Federal University of Amazonas, UFAM, Humaitá, Amazonas, Brazil; Campos Mantovanelli, B., Federal University of Santa Maria, Santa Maria, Rio Grande do Sul, Brazil; da Cunha, J.M., Federal University of Amazonas, UFAM, Humaitá, Amazonas, Brazil; Franciscon, U., Federal University of Ama…	Anthropic soils; Geostatistics; Multivariate	Aggregates; Microporosity; Moisture; Multivariant analysis; Descriptive statistics; Geo-statistics; Mean weight diameter; Multivariate; Multivariate statistics; Penetration resistances; Soil physical property; Spatial variability; Soils; anthropogenic effect; archaeology; cocoa; coffee; Earth; geostatistics; grassland; multivariate analysis; physical property; sampling; soil fertility; spatial va…				Andrade, R.S., Stone, L.F., Godoy, G.S., Estimativa da resistência do solo à penetração baseada no índice S e no estresse efetivo (2013) Revista Brasileira de engenharia Agrícola e Ambiental, 17 (9), pp. 932-937. , http://10.1590/S1415-43662013000900004; Aquino, R.E., Campos, M.C.C., Oliveira, I.A., Marques Junior, J., Silva, D.M.P., Silva, D.A.P., Variabilidade espacial de atributos físicos de s…	Campos Mantovanelli, B.; Federal University of Santa MariaBrazil; email: brunomantovanelli21@gmail.com		Elsevier B.V.	1671987		SOTRD	English	Soil Tillage Res.	Article	Final		Scopus	2-s2.0-85047159645
Rodríguez-Garay F.A., Camacho-Tamayo J.H., Rubiano-Sanabria Y.	57194022217;14041057500;56012232900;	Spatial Variability Of The Chemical Properties Of The Soil In The Coffee Yield And Quality [Variabilidad Espacial De Los Atributos Químicos Del Suelo En El Rendimiento Y Calidad De Café]	2016	Corpoica Ciencia y Tecnologia Agropecuaria	17	2		237	254		1	10.21930/rcta.vol17_num2_art:493	https://www.scopus.com/inward/record.uri?eid=2-s2.0-85018310384&doi=10.21930%2frcta.vol17_num2_art%3a493&partnerID=40&md5=6e249237eaf8b2652a0a97690036e334	Universidad Nacional de Colombia; Colombia; Universidad Nacional de Colombia; Colombia;	Rodríguez-Garay, F.A., Universidad Nacional de Colombia, Facultad de Ciencias Agrarias, Departamento de Agronomía, Bogotá, Colombia; Camacho-Tamayo, J.H., Universidad Nacional de Colombia, Facultad de Ingeniería, Departamento de Ingeniería Civil y Agrícola, Bogotá, Colombia; Rubiano-Sanabria, Y., Universidad Nacional de Colombia, Facultad de Ciencias Agrarias, Departamento de Agronomía, Bogotá, C…	Cluster; Coffea arabica; Component analysis; Crop yield; Krigging					Acevedo, C., Álvarez, M.E., Hernández, E., Maldonado, R., Pérez, M., Castro, R., Variabilidad espacial de las propiedades químicas del suelo y su uso en el diseño de experimentos (2008) Terra Latinoamericana, 26 (4), pp. 317-324; Alvarado, G., Posada, H.E., Cortina, H.A., Duque, H., Baldión, J.V., Guzmán, O., La variedad Castillo Santa Bárbara para las regiones cafeteras de Cundinamarca y Boyacá …			Corporacion Colombiana de Investigacion Agropecuaria Corpoica	1228706			Spanish	Corpoica Cienc. Tecnol. Agropecu.	Article	Final	All Open Access, Gold, Green	Scopus	2-s2.0-85018310384
Ferraz G.A.S., Da Silva F.M., De Oliveira M.S., Da Silva F.C., Bueno R.L.	55322659100;55126474900;12804341400;55969247100;56537971100;	Spatial Variability Of The Detachment Force Of Coffee Fruit [Variabilidade Espacial Da Força De Desprendimento De Frutos Do Cafeeiro]	2014	Engenharia Agricola	34	6		1210	1223		4	10.1590/s0100-69162014000600016	https://www.scopus.com/inward/record.uri?eid=2-s2.0-84924114807&doi=10.1590%2fs0100-69162014000600016&partnerID=40&md5=af21a66f007f1117f11d032cbe3b64a3	federal university of lavras, brazil; Federal University of Lavras, brazil; Federal University of Fluminense, brazil ; CEIFA Máquinas, brazil ;	Ferraz, G.A.S., Depto. de Engenharia, Federal University of de Lavras, Lavras - MG, Brazil; da Silva, F.M., Depto. de Engenharia, Federal University of de Lavras, Lavras - MG, Brazil; de Oliveira, M.S., Depto. de Ciências Exatas, Federal University of de Lavras, Lavras - MG, Brazil; da Silva, F.C., Depto. de Engenharia Agrícola e do Meio Ambiente, Federal University of Fluminense, Niterói - RJ, B…	Coffee; Geostatistics; Precision agriculture; Selective and mechanized harvest; Sun exposure side					Alves, M.C., Silva, F.M., Moraes, J.C., Pozza, E.A., Oliveira, M.S., Souza, J.C.S., Alves, L.S., Geostatistical analysis of the spatial variation of the berry borer and leaf miner in a coffee agroecosystem (2009) Precision Agriculture, Dordrecht, 10 (12), pp. 1-14. , Dec; Alves, M.C., Silva, F.M., Pozza, E.A., Oliveira, M.S., Modeling spatial variability and pattern of rust and brown eye spot in …			Sociedade Brasileira de Engenharia Agricola	1006916			Portuguese	Eng. Agric.	Article	Final	All Open Access, Gold, Green	Scopus	2-s2.0-84924114807
Ferraz G.A.S., Da Silva F.M., De Oliveira M.S., Avelar R.C., Sales R.S.	55322659100;55126474900;12804341400;56378435200;56522756700;	Spatial Variability Of The Dosage Of P2O5 And K2O To Fertilize In A Variable Rate And In A Conventional Way In A Coffee Field [Variabilidade Espacial Da Dose De P2O5 E K2O Para Adubacà O Diferenciada E Convencional Em Lavoura Cafeeira]	2015	Coffee Science	10	3		346	356		8		https://www.scopus.com/inward/record.uri?eid=2-s2.0-84938696326&partnerID=40&md5=16ea04f2b0ab16caf4e7c926ab24bc57	federal university of lavras, brazil; Federal University of Lavras, Lavras, brazil ; Cooperativa dos Cafeicultores do Cerrado Monte Carmelo LTDA, brazil ;	Ferraz, G.A.S., Federal University of de Lavras/UTFA, Departamento de Engenharia/DEG, Lavras, MG 37200-000, Brazil; da Silva, F.M., Federal University of de Lavras/UTFA, Departamento de Engenharia/DEG, Lavras, MG 37200-000, Brazil; de Oliveira, M.S., Federal University of de Lavras/UFLA, Departamento de Ciencias Exatas/DEX, Lavras, MG 37200-000, Brazil; Avelar, R.C., Cooperativa dos Cafeicultores…	Coffee plant; Fertilizers; Geostatistics; Precision agriculture					Alves, M.C., Geostatistical analysis of the spatial variation of the berry borer and leaf miner in a coffee agroecosystem (2009) Precision Agriculture, 10 (12), pp. 1-14. , Dordrecht; Amado, T., Atributos químicos e físicos de latossolos e sua relaçâo com os rendimentos de milho e feijâo irrigados (2009) Revista Brasileira De Ciência Do Solo, 33 (4), pp. 831-843. , Viçosa; Bachmaier, M., Backers,…			Editora UFLA	18096875			Portuguese	Coffee Sci.	Article	Final		Scopus	2-s2.0-84938696326
Ferraz G.A.S., Da Silva F.C., Alencar Nunes R., Ferreira Ponciano P.	55322659100;55969247100;56009989000;56421977300;	Spatial Variability Of The Noise Generated By A Portable Harvester In A Coffee Field [Variabilidade Espacial Do Ruído Gerado Por Uma Derriçadora Portátil Em Lavoura Cafeeira]	2013	Coffee Science	8	3		276	283		3		https://www.scopus.com/inward/record.uri?eid=2-s2.0-84892769470&partnerID=40&md5=165b80a2f377a661e00f0e4f56e60cdc	Federal University of Rural do Rio de Janeiro, brazil ; Federal University of Fluminense, brazil ; Federal University of Lavras, brazil;	Ferraz, G.A.S., Federal University of Rural do Rio de Janeiro/UFRRJ, Instituto de Tecnologia, Departamento de Engenharia (IT/DE), Rodovia BR 465 - Km 7 - 23, 890-000 - Seropédica - RJ, Brazil; da Silva, F.C., Federal University of Fluminense, Departamento de Engenharia Agrícola e do Meio Ambiente -, Rua Passo da Pátria, 156 - São Domingos, 24210-240 - Niterói - RJ, Brazil; Alencar Nunes, R., Fede…	Geostatistics; Mapping; Salubrity; Semimechanized coffee harvest					Alves, A.D.S., Níveis de potência sonora emitidos por trato agrícola em condições estáticas e dinâmicas (2011) Pesquisa Agropecuária Tropical, Goiânia, 41, pp. 110-119. , jan./mar; NBR 9999: Medição do nível de ruído no posto de operação de tratores e máquinas agrícolas (1987) Rio De Janeiro, p. 21. , ASSOCIAÇÃO BRASILEIRA DE NORMAS TÉCNICAS; Barbosa, J.A., Salvador, N., Silva, F.M., Desempenho o…	Federal University of Rural do Rio de Janeiro/UFRRJ, Rodovia BR 465 - Km 7 - 23, 890-000 - Seropédica - RJ, Brazil			18096875			English; Portuguese	Coffee Sci.	Article	Final		Scopus	2-s2.0-84892769470
De Oliveira R.B., Lima J.S.S., Silva S.A., Antuniassi U.R., Da Silva A.F.	15047730700;35105264900;25637770400;7801660601;36247099300;	Spatial Variability Of The Nutritional Condition Of Canephora Coffee Aiming Specific Management [Variabilidade Espacial Do Estado Nutricional Do Cafeeiro Canephora Visando O Manejo Localizado]	2010	Coffee Science	5	3		190	196		5		https://www.scopus.com/inward/record.uri?eid=2-s2.0-79956359424&partnerID=40&md5=36d4a7205a7ac98551a2915c9368a69e	State University São Paulo, brazil ; Federal University of Espírito Santo, brazil ; Federal University of Viçosa, brazil ; State University São Paulo, brazil ; State University São Paulo, brazil ;	de Oliveira, R.B., Engo. Agrônomo, Doutorando-FCA/UNESP-Depto de Eng. Rural-Caixa Postal, 237-18610-307-Botucatu, SP, Brazil; Lima, J.S.S., Engo. Agrícola, Adjunto do Depto de Eng. Rural-CCA-UFES-Caixa Postal, 16-29500-000-Alegre, ES, Brazil; Silva, S.A., Engo. Agrônomo, Doutorando-Federal University of de Viçosa/UFV-Depto de Eng. Agrícola, 36.570-000-Viçosa-MG, Brazil; Antuniassi, U.R., Engo. Ag…	Leaf nutrition; Precision agriculture; Variograms	Coffea canephora				Bachmaier, M., Backes, M., Variogram or semivariogram?: Understanding the variances in a variogram (2008) Precision Agriculture, 9 (3), pp. 173-175; Bragança, S.M., (2001) Café Canephora, Adubação E Calagem, , Vitória: INCAPER, INCAPER. Circular técnica, 1; Acompanhamento da safra brasileira: Boletim safra 2008 (2008) Segunda Estimativa. Brasília, p. 18. , COMPANHIA NACIONAL DE ABASTECIMENTO; Cos…	Batista de Oliveira, R.; Engo. Agrônomo, , 237-18610-307-Botucatu, SP, Brazil; email: rbatista@fca.unesp.br			18096875			Portuguese	Coffee Sci.	Article	Final		Scopus	2-s2.0-79956359424
Kamimura K.M., Dos Santos G.R., De Oliveira M.S., Dias Junior M.S., Guimarães P.T.G.	35076048200;36620718600;12804341400;35612997700;7006331310;	Spatial Variability Of The Physical Properties Of A Red Yellow Latosol Under Coffee [Variabilidade Espacial De Atributos Físicos De Um Latossolo Vermelho-Amarelo, Sob Lavoura Cafeeira]	2013	Revista Brasileira de Ciencia do Solo	37	4		877	888		15	10.1590/S0100-06832013000400006	https://www.scopus.com/inward/record.uri?eid=2-s2.0-84884760985&doi=10.1590%2fS0100-06832013000400006&partnerID=40&md5=bd80320041d897a9911c20f2a87ecdc3	federal university of lavras, brazil; Federal University of Viçosa, brazil ; Federal University of Lavras, brazil; Federal University of Lavras, brazil; Empresa de Pesquisa Agropecuária de Minas Gerais, brazil ;	Kamimura, K.M., DCS/UFLA, Caixa Postal 3037, CEP 37200-000 Lavras MG, Brazil; dos Santos, G.R., Federal University of de Viçosa, Departamento de Estatística, Brazil; de Oliveira, M.S., Departamento de Ciências Exatas/UFLA, Brazil; Dias Junior, M.S., DCS/UFLA, FAPEMIG, Brazil; Guimarães, P.T.G., Centro Tecnológico do Sul de Minas, Empresa de Pesquisa Agropecuária de Minas Gerais (CTSM/EPAMIG), Cam…	Compaction; Geostatistics; Soil property maps					Ajayi, A.E., Dias Jr., M.S., Curi, N., Araújo Jr., C.F., Souza, T.T.T., Inda Jr., A.V., Strength attributes and compaction susceptibility of Brasilian Latosols (2009) Soil Till. Res., 105, pp. 122-127; Amaro Filho, J., Negreiros, R.F.D., Assis Jr., R.N., Mota, C.A., Amostragem e variabilidade espacial de atributos físicos de um Latossolo Vermelho em Mossoró, RN (2007) R. Bras. Ci. Solo, 31, pp. 4…	DCS/UFLA, Caixa Postal 3037, CEP 37200-000 Lavras MG, Brazil			1000683			English; Portuguese	Rev. Bras. Cienc. Solo	Article	Final	All Open Access, Gold, Green	Scopus	2-s2.0-84884760985
Da Fonseca A.S., De Lima J.S.S., De Silva S.A., Xavier A.C., Drumond Neto A.P.	56896903800;56896826700;25637770400;12805120700;36342236300;	Spatial Variability Of The Productivity And The Nutritional Condition Of Coffee Canephora [Variabilidade Espacial Da Produtividade E Do Estado Nutricional Do Cafeeiro Canephora]	2015	Coffee Science	10	4		420	428		4		https://www.scopus.com/inward/record.uri?eid=2-s2.0-84943636535&partnerID=40&md5=603ac2be5d09e90886922d0f42085e37	Federal University of Espírito Santo, brazil ; Federal University of Espírito Santo, brazil ;	da Fonseca, A.S., Federal University of do Espírito Santo/UFES, Cx. P. 16, Alegre, ES 29500-000, Brazil; de Lima, J.S.S., Federal University of do Espírito Santo/UFES, Departamento de Engenharia Rural, DER/CCA - Cx. P. 16, Alegre, ES 29500-000, Brazil; de Silva, S.A., Federal University of do Espírito Santo/UFES, Departamento de Engenharia Rural, DER/CCA - Cx. P. 16, Alegre, ES 29500-000, Brazil;…	Foliar analysis; Precision agriculture; Semivariograms					Amado, T.J.C., Variabilidade espacial e temporal da produtividade de culturas sob sistema plantio direto (2007) Pesquisa Agropecuária Brasileira, Brasília, 42 (8), pp. 1101-1110. , ago; Amaral, J.A.T., Crescimento vegetativo e produtividade de cafeeiros conilon propagados por estacas em tubetes (2007) Ciência E Agrotecnologia, Lavras, 31 (6), pp. 1624-1629. , nov./dez; Barbosa, D.H.S.G., Estabele…			Editora UFLA	18096875			English	Coffee Sci.	Article	Final		Scopus	2-s2.0-84943636535
Santini P.T., Almeida L.G., De Souza K.R.D., Barbosa J.P.R.A.D., Alves J.D.	57202080812;57204534432;55515281400;23984236000;7102351365;	Spatio-Temporal Variability Of Carbohydrate And Chlorophyll Content In The Coffee Canopy [Variabilidade Espaço-Temporal Do Teor De Carboidrato E De Clorofila Na Copa Do Cafeeiro]	2019	Coffee Science	14	3		366	372			10.25186/cs.v14i3.1590	https://www.scopus.com/inward/record.uri?eid=2-s2.0-85073808829&doi=10.25186%2fcs.v14i3.1590&partnerID=40&md5=7e624275bbb4d6f28956417fbb382366	federal university of lavras, brazil; Federal University of Alfenas, brazil ;	Santini, P.T., Federal University of de Lavras/UFLA, Departamento de Biologia/DBI, Cx. P. 3037, Lavras, MG 37.200-000, Brazil; Almeida, L.G., Federal University of de Lavras/UFLA, Departamento de Biologia/DBI, Cx. P. 3037, Lavras, MG 37.200-000, Brazil; de Souza, K.R.D., Federal University of de Alfenas/ UNIFAL, Departamento de Biologia, Rua Gabriel Monteiro da Silva, 700 - Centro - 37.130-001, A…	Coffea arabica; Plant pigments; Sugars		The authors give thanks to the Coordena??o de Aperfei?oamento de Pessoal de N?vel Superior (CAPES - financiamento CF-001), Conselho Nacional de Desenvolvimento Cient?fico e Tecnol?gico (CNPq), and to the Funda??o de Amparo ? Pesquisa do Estado de Minas Gerais (FAPEMIG).	The authors give thanks to the Coordenação de Aperfeiçoamento de Pessoal de Nível Superior (CAPES – financiamento CF-001), Conselho Nacional de Desenvolvimento Científico e Tecnológico (CNPq), and to the Fundação de		Alves, E.A., (2005) Análise da variabilidade espacial da qualidade do café cereja produzido em região de montanha, p. 43. , M.Sc. Dissertation, Federal University of de Viçosa, Brazil; Baliza, D.P., Metabolismo da sacarose em cafeeiros submetidos a diferentes níveis de sombreamento (2014) Coffee Science, 9 (4), pp. 445-455. , Lavras, dez; Batista, K.D., Photosynthetic limitations in coffee plants…			Editora UFLA	18096875			English	Coffee Sci.	Article	Final		Scopus	2-s2.0-85073808829
Cordero-Sancho S., Sader S.A.	55270755900;7003917433;	Spectral Analysis And Classification Accuracy Of Coffee Crops Using Landsat And A Topographic-Environmental Model	2007	International Journal of Remote Sensing	28	7		1577	1593		38	10.1080/01431160600887680	https://www.scopus.com/inward/record.uri?eid=2-s2.0-34147103795&doi=10.1080%2f01431160600887680&partnerID=40&md5=edc2a6f2b6fc5a5522b08367a5a16b68	University of Maine, United States;	Cordero-Sancho, S., School of Forest Resources, University of Maine, 260 Nutting Hall, Orono, ME 04469-5755, United States; Sader, S.A., School of Forest Resources, University of Maine, 260 Nutting Hall, Orono, ME 04469-5755, United States		Crops; Mapping; Mathematical models; Remote sensing; Satellite imagery; Spectrum analysis; Topography; Coffee crops; Landsat Enhanced Thematic Mapper; Topographic-environmental model; Agriculture; accuracy assessment; coffee; crop plant; data set; discriminant analysis; land classification; land cover; Landsat thematic mapper; mapping; NDVI; satellite imagery; spectral analysis; stratification; t…	This research was supported by NASA Grant NAG5-8712 to the University of Maine. The authors are grateful to the Instituto Costarricense del Cafe for providing the coffee census data and aerial photos to support the research.			Asner, G.P., Keller, M., Pereira, R., Zweede, J.C., Remote sensing of selective logging in Amazonia assessing limitations based in detailed field observations, Landsat ETM+, and texture analysis (2002) Remote Sensing of Environment, 80, pp. 483-496; Baban, S.M.J., Yusof, K.W., Mapping land use/cover distribution on a mountainous tropical island using remote remote sensing and GIS (2001) Internati…	Sader, S.A.; School of Forest Resources, 260 Nutting Hall, Orono, ME 04469-5755, United States		Taylor and Francis Ltd.	1431161		IJSED	English	Int. J. Remote Sens.	Article	Final		Scopus	2-s2.0-34147103795
Faria R.O., Silva F.M., Ferraz G.A.E.S., Herrera M.A.D., Barbosa B.D.S., Alonso D.J.C., Soares D.V.	57204332481;36139880500;55322659100;57204319430;56814632200;57204036429;57218891793;	Technical And Economic Viability Of Manual Harvesting Coffee Yield Maps	2020	Coffee Science	15	1	e151674	1	5			10.25186/.v15i.1674	https://www.scopus.com/inward/record.uri?eid=2-s2.0-85090661954&doi=10.25186%2f.v15i.1674&partnerID=40&md5=892595ad68cb40a644fc767c20dc68f2	federal university of lavras, brazil; Universidade SurColombia; na, Colombia;	Faria, R.O., Federal University of de Lavras/UFLA, Departamento de Engenharia Agrícola/DEA, Lavras, MG, Brazil; Silva, F.M., Federal University of de Lavras/UFLA, Departamento de Engenharia Agrícola/DEA, Lavras, MG, Brazil; Ferraz, G.A.E.S., Federal University of de Lavras/UFLA, Departamento de Engenharia Agrícola/DEA, Lavras, MG, Brazil; Herrera, M.A.D., Universidade Surcolombiana/USCO, Faculdad…	Costs; Crop mapping; Field efficiency; Precision agriculture		UFLA, Samambaia Farm, Bom Jardim Coffee Seeds, FAPEMIG and CAPES.			BATISTA, J. V., SAMPAIO, O. B., SILVA, F. F., A influência de fatores climáticos e ambientais sobre saúde de trabalhadores florestais (2014) Revista em Agronegócios e Meio Ambiente, 7 (2), pp. 359-390. , da; BERNARDI, A. C. C., Ferramentas de agricultura de precisão como auxílio ao manejo da fertilidade do solo (2015) Cadernos de Ciência & Tecnologia, 32 (1), pp. 211-227. , (/2); CARVALHO, L. C. …			Editora UFLA	18096875			English	Coffee Sci.	Article	Final	All Open Access, Gold	Scopus	2-s2.0-85090661954
Timm L.C., Dourado-Neto D., Bacchi O.O.S., Hu W., Bortolotto R.P., Silva A.L., Bruno I.P., Reichardt K.	15766615700;7004141879;6701398896;56662605400;24512058000;25641881300;13204641500;7003597145;	Temporal Variability Of Soil Water Storage Evaluated For A Coffee Field	2011	Soil Research	49	1		77	86		18	10.1071/SR10023	https://www.scopus.com/inward/record.uri?eid=2-s2.0-79955375479&doi=10.1071%2fSR10023&partnerID=40&md5=fbe51ee340cdbe46a4572957e63b0549	Univerdidade Federal de Pelotas, brazil ; University of São Paulo, Brazil; University of São Paulo, Brazil; Chinese Academy of Sciences, China; Fazenda Santo Antônio, brazil ;	Timm, L.C., Department of Rural Engineering, FAEM, UFPel, Pelotas, RS C.P. 354-96001-970, Brazil; Dourado-Neto, D., Crop Science Department, ESALQ, USP, Piracicaba, SP C.P. 9, 13418-900, Brazil; Bacchi, O.O.S., Soil Physics Laboratory, CENA, USP, Piracicaba, SP C.P. 96, 13416-903, Brazil; Hu, W., Key Laboratory of Water Cycle and Related Surface Processes, Institute of Geographic Sciences and Nat…	multiple regression; neutron probe; sampling number; state-space; state-time	Contour line; Field soil; Frequency domains; Multiple regressions; Neutron moderation; Observation point; Reflectrometry; Sampling points; Soil water content; Soil water storage; Spatial variability; State-space; state-time; Statistical analysis; Temporal stability; Temporal variability; Time interval; Time-domain reflectrometry; Neutrons; Probes; Regression analysis; Soil moisture; Water content…				Aboitiz, M., Labadie, J.W., Heermann, D.F., Stochastic soil moisture estimation and forecasting for irrigated fields (1986) Water Resources Research, 22 (2), pp. 180-190; Allen, R.G., Pereira, L.S., Raes, D., Smith, M., Crop evapotranspiration guidelines for computing crop water requirements (1998) FAO Irrigation and Drainage Paper, (56). , FAO: Rome; Centro nacional de pesquisa de solo (2006) Si…	Timm, L. C.; Department of Rural Engineering, , Pelotas, RS C.P. 354-96001-970, Brazil; email: lctimm@ufpel.edu.br			1838675X			English	Soil Res.	Article	Final		Scopus	2-s2.0-79955375479
Molin J.P., De Araujo Motomiya A.V., Frasson F.R., Di Chiacchio Faulin G., Tosta W.	7006923680;36677301600;36677113200;36677199800;36678360300;	Test Procedure For Variable Rate Fertilizer On Coffee [Método Para Avaliação De Aplicaç Ão De Fertilizantes Em Taxa Variávelem Café]	2010	Acta Scientiarum - Agronomy	32	4		569	575		26	10.4025/actasciagron.v32i4.5282	https://www.scopus.com/inward/record.uri?eid=2-s2.0-78650186678&doi=10.4025%2factasciagron.v32i4.5282&partnerID=40&md5=eedbfecce06abdb439797f09d44a8b6b	University of São Paulo, Brazil; Federal University of Grande Dourados, brazil ; Comércio Atacadista e Indústria de Peças Agrícolas Ltda, brazil ; Máquinas Agrícolas Jacto S.A., brazil ;	Molin, J.P., Departamento de Engenharia de Biossistemas, Escola Superior de Agricultura 'Luiz de Queiroz', Universidade de São Paulo, Av. Pádua Dias, 11, 13418-900, Piracicaba, São Paulo, Brazil; de Araujo Motomiya, A.V., Faculdade de Ciências Agrárias, Federal University of da Grande Dourados, Dourados Mato Grosso do Sul, Brazil; Frasson, F.R., Comércio Atacadista e Indústria de Peças Agrícolas …	Precision agriculture; Soil fertility; Yield map	Coffea arabica				Cambardella, C.A., Moorman, T.B., Parkin, T.B., Karlen, D.L., Novak, J.M., Turco, R.F., Konopka, A.E., Field-scale variability of soil properties in central Iowa soils (1994) Soil Science Society of America Journal, 58 (5), pp. 1501-1511; Chien, Y.J., Lee, D.Y., Guo, H.Y., Geostatistical analysis of soil properties of mid-west Taiwan soils (1997) Soil Science, 162 (4), pp. 291-298; Corá, J.E., Mo…	Molin, J. P.; Departamento de Engenharia de Biossistemas, Av. Pádua Dias, 11, 13418-900, Piracicaba, São Paulo, Brazil; email: jpmolin@usp.br			16799275			Portuguese	Acta Sci. Agron.	Article	Final	All Open Access, Gold, Green	Scopus	2-s2.0-78650186678
Valente D.S.M., De Queiroz D.M., Pinto F.A.C., Santos N.T., Santos F.L.	55081047300;6602255317;7102739792;24463799400;22951558100;	The Relationship Between Apparent Soil Electrical Conductivity And Soil Properties [Relação Entre Condutividade Elétrica Aparente E Propriedades Do Solo]	2012	Revista Ciencia Agronomica	43	4		683	690		26	10.1590/S1806-66902012000400009	https://www.scopus.com/inward/record.uri?eid=2-s2.0-84865034252&doi=10.1590%2fS1806-66902012000400009&partnerID=40&md5=e4f802338f04b1abf7b3ddb8ddb12a11	Federal University of Viçosa, brazil ; Federal University of Viçosa, brazil ;	Valente, D.S.M., Departamento de Engenharia Agrícola/UFV, Campus UFV, Viçosa-MG, 36.570-000, Brazil; de Queiroz, D.M., Departamento de Engenharia Agrícola/UFV, Campus UFV, Viçosa-MG, 36.570-000, Brazil; Pinto, F.A.C., Departamento de Engenharia Agrícola/UFV, Campus UFV, Viçosa-MG, 36.570-000, Brazil; Santos, N.T., Departamento de Estatística/UFV, Campus UFV, Viçosa-MG, 36.570-000, Brazil; Santos,…	Management zone; Precision agriculture; Sensors					Aimrun, W., Spatial variability of bulk soil electrical conductivity in a Malaysian paddy field: key to soil management (2007) Paddy Water Environ, 5 (2), pp. 113-121; Bekele, A., Scale dependent variability of soil electrical conductivity by indirect measures of soil properties (2005) Journal of Terramechanics, 42 (3-4), pp. 339-351; Cambouris, A.N., Soil management zones delineated by electrica…	Valente, D.S.M.; Departamento de Engenharia Agrícola/UFV, Campus UFV, Viçosa-MG, 36.570-000, Brazil; email: valente@ufv.br		Federal University of do Ceara	456888			English; Portuguese	Rev. Cienc. Agron.	Article	Final	All Open Access, Gold, Green	Scopus	2-s2.0-84865034252
Da Rocha Miranda J., De Carvalho Alves M.	57219455179;54986802600;	The Use Of Machine Learning In Digital Processing Of Satellite Images Applied To Coffee Crop	2020	CAB Reviews: Perspectives in Agriculture, Veterinary Science, Nutrition and Natural Resources	15	45	PAVSNNR202015045					10.1079/PAVSNNR202015045	https://www.scopus.com/inward/record.uri?eid=2-s2.0-85092795259&doi=10.1079%2fPAVSNNR202015045&partnerID=40&md5=16e6767e9f0abb113ca0982c44752eb9	federal university of lavras, brazil;	Da Rocha Miranda, J., Department of Agricultural Engineering, Federal University of Lavras, Campus Universitário, P.O. Box 3037, Lavras, Brazil; De Carvalho Alves, M., Department of Agricultural Engineering, Federal University of Lavras, Campus Universitário, P.O. Box 3037, Lavras, Brazil	Agriculture; Data mining; Landsat; Mapping crop; MODIS; Remote sensing; Sentinel-2					(2020) Acompanhamento da safra brasileira 2019/2020, pp. 1-29. , CONAB. [Internet]; Bernardes, T, Alves Moreira, M, Adami, M, Friedrich Theodor Rudorff, B., Monitoring biennial bearing effect on coffee yield using MODIS remote sensing imagery (2012) International Geoscience and Remote Sensing Symposium (IGARSS), 4, pp. 3760-3763; Assis Silva, S, de Queiroz, DM, Ferreira, WPM, Corrêa, PC, dos Sant…	De Carvalho Alves, M.; Department of Agricultural Engineering, P.O. Box 3037, Brazil; email: marcelo.alves@ufla.br		CABI International	17498848			English	CAB Rev. Perspect. Agric. Vet. Sci. Nutr. Nat. Resour.	Article	Final		Scopus	2-s2.0-85092795259
Lamparelli R.A.C., Johann J.A., Dos Santos É.R., Esquerdo J.C.D.M., Rocha J.V.	6602713722;24463356500;55338995000;15020462500;7202074304;	Use Of Data Mining And Spectral Profiles To Differentiate Condition After Harvest Of Coffee Plants	2012	Engenharia Agricola	32	1		184	196		4	10.1590/S0100-69162012000100019	https://www.scopus.com/inward/record.uri?eid=2-s2.0-84865129553&doi=10.1590%2fS0100-69162012000100019&partnerID=40&md5=abe04102cae6c69509aaf05cb36c027f	University of Campinas, Brazil; University of Campinas, Brazil; University of Campinas, Brazil; University of Campinas, Brazil; University of Campinas, Brazil;	Lamparelli, R.A.C., CEPAGRI, UNICAMP, Cidade Universitária, Av. André Tosello, 209, Campinas, SP, Brazil; Johann, J.A., FEAGRI, UNICAMP, Cidade Universitária, Av. Candido Rondon, 501, Campinas, SP, Brazil; Dos Santos, É.R., Coordenador de Geoprocessamento, Cooxupé, Av. Dr. Antônio Pereira Lima, 762, Monte Santo de Minas, MG, Brazil; Esquerdo, J.C.D.M., CNPTIA, EMBRAPA, Cidade Universitária, Av. A…	Crop monitoring; Management; Orbital remote sensing; Spectral behavior					Denise, E., Baranoski, G.V.G., The application of photoacousticabsorption spectral data to the modeling of leaf optical properties in the visible range (2007) IEEE Transactions on Geosciense and Remote Sensing, 45 (12), pp. 4077-4086. , Piscataway; Fayyad, U., Shapiro, G.P., Smyth, P., Knowledge discovery and data mining: Towards a unifying framework (1996) INTERNATIONAL CONFERENCE ON KNOWLEDGE D…	Lamparelli, R.A.C.; CEPAGRI, Av. André Tosello, 209, Campinas, SP, Brazil; email: rubens@cpa.unicamp.br			1006916			English	Eng. Agric.	Article	Final	All Open Access, Gold, Green	Scopus	2-s2.0-84865129553
De Souza Lima J.S., De Assis Silva S., De Oliveira R.B., Da Fonseca A.S.	55312612800;25637770400;15047730700;56896903800;	Use Of Kriging Techniques To Estimate Conilon Coffee Productivity [Estimativa Da Produtividade De Café Conilon Utilizando Técnicas De Cokrigagem]	2016	Revista Ceres	63	1		54	61		3	10.1590/0034-737X201663010008	https://www.scopus.com/inward/record.uri?eid=2-s2.0-84958568904&doi=10.1590%2f0034-737X201663010008&partnerID=40&md5=f73c5af2924cfed5597e14cd7ad228f6	Federal University of Espírito Santo, brazil ; Universidade Estadual do Norte do Paraná, brazil ;	de Souza Lima, J.S., Federal University of do Espírito Santo, Centro de Ciências Agrárias, Departamento de Engenharia Rural, Alegre, Espírito Santo, Brazil; de Assis Silva, S., Federal University of do Espírito Santo, Centro de Ciências Agrárias, Departamento de Engenharia Rural, Alegre, Espírito Santo, Brazil; de Oliveira, R.B., Universidade Estadual do Norte do Paraná, Centro de Ciências Agrári…	Cross semivariogram; Geostatistics; Spatial variability					Berlato, M.A., Farenzena, H., Fontana, D.C., Associação entre El Nino Oscilação Sul e a produtividade do milho no Estado do Rio Grande do Sul (2005) Pesquisa Agropecuária Brasileira, 39, pp. 423-432; Bottega, E.L., Silva, A.S., Costa, M.M., Bottega, S.P., Cokrigagem na estimativa dos teores de Ca e Mg em um Latossolo Vermelho distroférrico (2011) Revista Ciência Agronomica, 42, pp. 821-828; Camba…	de Souza Lima, J.S.; Federal University of do Espírito Santo, Brazil; email: limajss@yahoo.com.br		Federal University of de Vicosa	0034737X			Portuguese	Rev. Ceres	Article	Final	All Open Access, Gold, Green	Scopus	2-s2.0-84958568904
Parreiras T.C., Lense G.H.E., Moreira R.S., Santana D.B., Mincato R.L.	57211317466;57200796207;56017878300;57217735646;6505869497;	Using Unmanned Aerial Vehicle And Machine Learning Algorithm To Monitor Leaf Nitrogen In Coffee	2020	Coffee Science	15	1	e151736	1	9		3	10.25186/.v15i.1736	https://www.scopus.com/inward/record.uri?eid=2-s2.0-85090639229&doi=10.25186%2f.v15i.1736&partnerID=40&md5=a156607a3806785db9a680e005136a48	Federal University of Alfenas, brazil ;	Parreiras, T.C., Federal University of de Alfenas/UNIFAL, Alfenas, MG, Brazil; Lense, G.H.E., Federal University of de Alfenas/UNIFAL, Alfenas, MG, Brazil; Moreira, R.S., Federal University of de Alfenas/UNIFAL, Alfenas, MG, Brazil; Santana, D.B., Instituto Brasileiro de Geografia e Estatística/IBGE, Alfenas, MG, Brazil; Mincato, R.L., Federal University of de Alfenas/UNIFAL, Alfenas, MG, Brazil	Coffea arabica; Machine learning; RGB; Vegetation indices		This study was financed in part by the Coordination for the Improvement of Higher Education Personnel-Brazil (CAPES) ? Finance Code 001. The authors thank the Minas Gerais State Research Support Foundation (FAPEMIG) and the National Council for Scientific and Technological Development (CNPq) for the grants awarded. The authors also thank the Legado Caf?s that conceded the study area, and the Expe…			ALVARES, C. A., Köppen’s climate classification map for Brazil (2013) Meteorologische Zeitschrift, 22 (6), pp. 711-728; ARROYO, J., GUIJARRO, M., PAJARES, G., An instance-based learning approach for thresholding in crop images under different outdoor conditions (2016) Computers and Electronics in Agriculture, 127, pp. 669-679; BALLESTER, C., Assessment of In-Season Cotton Nitrogen Status and Lint…			Editora UFLA	18096875			English	Coffee Sci.	Article	Final	All Open Access, Gold	Scopus	2-s2.0-85090639229
Gomes R.P., Campos M.C.C., Brito W.B.M., Da Cunha J.M., Muniz A.W., Silva L.S., De Souza E.D., Oliveira I.A., De Freitas L.	57192412724;15841673600;57196480902;57196478638;55921973400;56117560100;24512271300;55791582900;57206531557;	Variability And Spatial Correlation Of Aggregates And Organic Carbon In Indian Dark Earth In Apuí Region, Am [Variabilidade E Correlação Espacial De Agregados E Carbono Orgânico Em Terra Preta De Índio Na Região Do Apuí, Am]	2018	Bioscience Journal	34	5		1188	1199		1	10.14393/BJ-v34n5a2018-39414	https://www.scopus.com/inward/record.uri?eid=2-s2.0-85058436803&doi=10.14393%2fBJ-v34n5a2018-39414&partnerID=40&md5=5ed97f0abb3dbc7dc4ded2cd2f04cb06	State University São Paulo, brazil ; Federal University of Amazonas, brazil ; Embrapa Amazônia Ocidental, brazil ; Federal University of Rondonópolis, brazil ; Instituto Federal de Educação, Ciência e Tecnologia do Pará, brazil ;	Gomes, R.P., Faculdade de Ciências Agrárias e Veterinárias, Universidade Estadual Paulista – FCAV/UNESP, Jaboticabal, SP, Brazil; Campos, M.C.C., Federal University of do Amazonas-UFAM, Humaitá, AM, Brazil; Brito, W.B.M., Federal University of do Amazonas-UFAM, Humaitá, AM, Brazil; da CUNHA, J.M., Federal University of do Amazonas-UFAM, Humaitá, AM, Brazil; Muniz, A.W., Embrapa Amazônia Ocidental…	Cross variogram; Geostatistics; Soil aggregation					Alho, L.C., Campos, M.C.C., Silva, D.M.P., Mantovanelli, B.C., Souza, Z.M., Variabilidade espacial da estabilidade de agregados e estoque de carbono em Cambissolo e Argissolo. Pesquisa Agropecuária Tropical (2014) Goiânia, 44 (3), pp. 246-254. , https://doi.org/10.1590/S1983-40632014000300001; Aquino, R.E., Campos, M.C.C., Marques Junior, J., Oliveira, I.A., Mantovaneli, B.C., Soares, M.D.R., Geo…	Gomes, R.P.; Faculdade de Ciências Agrárias e Veterinárias, Brazil; email: rpgagronomia@gmail.com		Federal University of de Uberlandia	15163725			English	Biosci. J.	Article	Final	All Open Access, Gold, Green	Scopus	2-s2.0-85058436803
Carducci C.E., Zinn Y.L., Rossoni D.F., Heck R.J., Oliveira G.C.	37119913900;17136516700;55233793400;7007147373;55325646800;	Visual Analysis And X-Ray Computed Tomography For Assessing The Spatial Variability Of Soil Structure In A Cultivated Oxisol	2017	Soil and Tillage Research	173			15	23		11	10.1016/j.still.2016.03.006	https://www.scopus.com/inward/record.uri?eid=2-s2.0-84964258006&doi=10.1016%2fj.still.2016.03.006&partnerID=40&md5=83647189b476effa6add3f363bcff9ec	Federal University of Santa Catarina, brazil ; Federal University of Lavras, brazil; stade university Maringá, brazil ; University of Guelph, Canada	Carducci, C.E., Federal University of Santa Catarina, Curitibanos, SC 89520-000, Brazil; Zinn, Y.L., Department of Soil Science, Federal University of Lavras, Lavras, MG 37200-000, Brazil; Rossoni, D.F., Department of Statistics, State University of Maringá, Maringá, PR 87020-900, Brazil; Heck, R.J., School of Environmental Science, University of Guelph, Guelph, ON N1 G 2W1, Canada; Oliveira, G.C…	Cultural profile methods; Semivariogram; Tropical soils	Agronomy; Computerized tomography; Cultivation; Tomography; Contrasting techniques; Geostatistical tools; Minas Gerais , Brazil; Prediction interval; Profile method; Semivariograms; Tropical soils; X-ray computed tomography; Soils; agricultural intensification; agricultural soil; coffee; Oxisol; plantation; rooting; soil analysis; soil depth; soil management; soil property; soil structure; spatia…	To Fapemig and CNPq for research funding and grants; to the Embrapa Caf? consortium for logistical support, and to AP Farm for lending sampling areas and logistical support.			Ajayi, A.E., Dias Junior, M.S., Curi, N., Gontijo, I., Araujo-Junior, C.F., Vasconcelos-Júnior, A.I., Relation of strength and mineralogical attibutes in Brazilian Latosols (2009) Soil Tillage Res., 102, pp. 14-18; Araujo Junior, C.F., Dias Junior, M.S., Guimarães, P.T.G., Alcântara, E.N., Capacidade de suporte de carga e umidade crítica de um Latossolo induzida por diferentes manejos (2011) Rev.…	Carducci, C.E.; Federal University of Santa CatarinaBrazil; email: ec.carducci@ufsc.br		Elsevier B.V.	1671987		SOTRD	English	Soil Tillage Res.	Article	Final		Scopus	2-s2.0-84964258006
Silva S.A., Lima J.S.S., Bottega E.L.	25637770400;35105264900;36190431000;	Yield Mapping Of Arabic Coffee And Their Relationship With Plant Nutritional Status	2013	Journal of Soil Science and Plant Nutrition	13	3		556	564		9	10.4067/S0718-95162013005000044	https://www.scopus.com/inward/record.uri?eid=2-s2.0-84886691286&doi=10.4067%2fS0718-95162013005000044&partnerID=40&md5=8ec8e1cfd88041edb4cf19084126d91b	State University Santa Cruz, Brazil; Federal University of Espírito Santo, brazil ; Federal University of Viçosa, brazil ;	Silva, S.A., Department of Agricultural and Environmental Sciences, State University of Santa Cruz, Zip Code 45662-900, Bahia, Brazil; Lima, J.S.S., Department of Agricultural Engineering, Federal University of Espírito Santo, Zip-Code 29500-000, ES, Brazil; Bottega, E.L., Department of Agricultural Engineering, Federal University of Viçosa, Zip-Code 36570-000, MG, Brazil	Coffea arabica; Geostatistics; Mineral nutrition; Precision agriculture					Cambardella, C.A., Moorman, T.B., Novak, J.M., Parkin, T.B., Karlen, D.L., Turco, R.F., Konopka, A.E., Field-scale variability of soil properties in Central Iowa soils (1994) Soil Science Society American Journal., 58, pp. 1501-1511; (1997) Embrapa Empresa Brasileira de Pesquisa Agropecuária. Centro Nacional de Pesquisa de Solo., p. 212. , Manual de métodos de análise de solo, 2a ed. Rio de Janei…	Silva, S. A.; Department of Agricultural and Environmental Sciences, , Zip Code 45662-900, Bahia, Brazil; email: sasilva@uesc.br			7189516			English	J. Soil Sci Plant Nutri.	Article	Final	All Open Access, Hybrid Gold, Green	Scopus	2-s2.0-84886691286
Martins, Rn, Pinto, Fdd, De Queiroz, Dm, Valente, Dsm, Rosas, Jtf		A Novel Vegetation Index For Coffee Ripeness Monitoring Using Aerial Imagery	2021	Remote Sensing	13	2					0	10.3390/rs13020263		Federal University of Viçosa, brazil ; University of São Paulo, Brazil;	Martins, RN (corresponding author), Federal University of Vicosa UFV, Dept Agr Engn, BR-36570900 Vicosa, MG, Brazil.	Coffea arabica L; coffee fruit ripeness; unmanned aerial vehicle; remote sensing																	WoS
Costa, Jd, Coelho, Rd, Barros, Thd, Fraga, Ef, Fernandes, Alt		Canopy Thermal Response To Water Deficit Of Coffee Plants Under Drip Irrigation	2020	Irrigation And Drainage	69	3		472	482		3	10.1002/ird.2429		University of São Paulo, Brazil; Federal University of Uberlandia, brazil ; Universidade de Campus Monte Carmelo, brazil ; Universidade de Uberaba, brazil ;	Costa, JD (corresponding author), Univ Sao Paulo, ESALQ, Biosyst Engn Dept, CP 09, BR-13418900 Piracicaba, SP, Brazil.	Coffea arabica; CWSI; leaf water potential; portable infrared sensor; Scholander chamber; thermal camera	STRESS INDEX; PHYSIOLOGICAL-RESPONSES; LEAF TEMPERATURE; MINAS-GERAIS; CROP; TRANSPIRATION; IMAGERY; STATE																WoS
Gomes, Apa, De Queiroz, Dm, Valente, Dsm, Pinto, Fdd, Rosas, Jtf		Comparing A Single-Sensor Camera With A Multisensor Camera For Monitoring Coffee Crop Using Unmanned Aerial Vehicles	2021	Engenharia Agricola	41	1		87	97		0	10.1590/1809-4430-Eng.Agric.v41n1p87-97/2021		Federal University of Vicosa, brazil ; University of São Paulo, Brazil;	Gomes, APA (corresponding author), Univ Fed Vicosa, Dept Engn Agr, Vicosa, MG, Brazil.	precision agriculture; UAV; radiometric calibration; modified RGB camera	RADIOMETRIC CALIBRATION; MULTISPECTRAL CAMERA; DIGITAL CAMERAS; UAV; AIRCRAFT																WoS
De Oliveira, Mf, Dos Santos, Af, Kazama, Eh, Rolim, Gd, Da Silva, Rp		Determination Of Application Volume For Coffee Plantations Using Artificial Neural Networks And Remote Sensing	2021	Computers And Electronics In Agriculture	184						0	10.1016/j.compag.2021.106096		State University São Paulo, brazil ; Federal University of Lavras, brazil; Universidade de Franca, brazil ;	de Oliveira, MF (corresponding author), Sao Paulo State Univ, UNESP, Dept Engn & Math Sci, Jaboticabal, SP, Brazil.	Coffee canopy; Vegetation index; Variable rate spraying; Machine learning; Digital agriculture	PLANT-PROTECTION PRODUCTS; GRAIN-YIELD; PARAMETERS; VEGETATION																WoS
Sales, Fo, Marante, Y, Vieira, Ab, Silva, Ef		Energy Consumption Evaluation Of A Routing Protocol For Low-Power And Lossy Networks In Mesh Scenarios For Precision Agriculture	2020	Sensors	20	14					0	10.3390/s20143814		Universidade Federal de Juiz de Fora, brazil ;	Silva, EF (corresponding author), Grad Program Comp Sci UFJF, BR-36036330 Juiz De Fora, MG, Brazil.	internet of things; energy consumption; routing protocol for low-power and lossy networks; precision agriculture; mesh networks																	WoS
Da Cunha, Jar, Neto, Mas, Hurtado, Smc		Estimating Vegetation Volume Of Coffee Crops Using Images From Unmanned Aerial Vehicles	2019	Engenharia Agricola	39			41	47		4	10.1590/1809-4430-Eng.Agric.v39nep41-47/2019		Federal University of Uberlandia, brazil ;	da Cunha, JAR (corresponding author), Univ Fed Uberlandia, Uberlandia, MG, Brazil.	unmanned aircraft system; digital image processing; canopy volume	UAV IMAGERY; ACCURACY; TOOLS; WHEAT; MODEL; TIME																WoS
Silva, Sd, Lima, Jsd, De Souza, Gs, De Oliveira, Rb, Xavier, Ac		Fuzzy Logic For Evaluation Of The Fertility Of Soil And Productivity Of Conilon Coffee	2010	Revista Ciencia Agronomica	41	1		9	17		7			Federal University of Vicosa, brazil ; Federal University of Espírito Santo, brazil ; Universidade Estadual Campinas, brazil ; State University São Paulo, brazil ; Federal University of Espírito Santo, brazil ;	Silva, SD (corresponding author), Univ Fed Vicosa, Dept Agr Engn, Av PH Rolfs,Campus Univ, BR-36570000 Vicosa, MG, Brazil.	Coffea canephora Pierre x Froenher; Fertility of the soil; Coffee growing; Geostatistics	SPATIAL VARIABILITY; DATA UNCERTAINTIES; REPRESENTATION; PROPAGATION; ATTRIBUTES; NETWORKS																WoS
Carvalho, Lcc, Da Silva, Fm, Ferraz, Gaes, Stracieri, J, Ferraz, Pfp, Ambrosano, L		Geostatistical Analysis Of Arabic Coffee Yield In Two Crop Seasons	2017	Revista Brasileira De Engenharia Agricola E Ambiental	21	6		410	414		5	10.1590/1807-1929/agriambi.v21n6p410-414		Universidade Estadual Santa Cruz, brazil ; Federal University of Lavras, brazil; Universidade Estadual Maringa, brazil ;	Carvalho, LCC (corresponding author), Univ Estadual Santa Cruz, Dept Ciencias Agr & Ambientais, Ilheus, BA, Brazil.	Coffea arabica L.; spatial variability; biennuality; maps; precision agriculture	SOIL PROPERTIES; VARIABILITY; PRODUCTIVITY; PHOSPHORUS; FIELD																WoS
Putra, Btw, Soni, P		Improving Nitrogen Assessment With An Rgb Camera Across Uncertain Natural Light From Above-Canopy Measurements	2020	Precision Agriculture	21	1		147	159		5	10.1007/s11119-019-09656-8		Jember University, Indonesia; , Indian Inst Technol Kharagpur, India	Soni, P (corresponding author), Indian Inst Technol Kharagpur, Dept Agr & Food Engn, Kharagpur 721302, W Bengal, India.	Broadband greenness; Standardization; Above-canopy measurement; Chlorophyll; Nitrogen content; Coffee plant	DIGITAL CAMERAS; CALIBRATION; SENSORS																WoS
Ozcelik, Ae, Nisanci, R		Land Use Patterns For Driving Environmental Management Of Tea Agricultural Croplands	2016	Computers And Electronics In Agriculture	122			41	54		5	10.1016/j.compag.2016.01.013		Recep Tayyip Erdoğan University, Turkey, Karadeniz Teknik Üniversitesi, Turkey	Ozcelik, AE (corresponding author), Recep Tayyip Erdogan Univ, Fac Engn, Dept Geomat Engn, TR-53100 Rize, Turkey.	Tea agriculture; Tea agricultural cropland; Tea agricultural parcel; Land administration; Geo-spatial data; Land certification	CAMELLIA-SINENSIS L.; COFFEE CERTIFICATION; FOREST CERTIFICATION; TENURE INSECURITY; DATA MODEL; ETHIOPIA; FARMERS; QUALITY; PARTICIPATION; INITIATIVES																WoS
De Melo, Bmr, Paglis, Cm, De Oliveira, Ms, Teixeira, Mbr, Da Silva, Jsm, Lima, Dff		Management Areas Due To Soil Properties, Topography And Productivity Of Coffee Plantations	2017	Revista Agrogeoambiental	9	2		49	59		0	10.18406/2316-1817v9n22017924		federal university of lavras, brazil; Federal University of Lavras, brazil; Federal University of Lavras, brazil; Federal University of Lavras, brazil; Instituto Federal do Sul Minas Gerais, brazil ;	de Melo, BMR (corresponding author), Univ Fed Lavras, Dept Agr DAG, Agron Fitotecnia, Av Doutor Sylvio Menicucci 1001, BR-37200000 Lavras, MG, Brazil.	Precision agriculture; Geostatistics; Gradient map	ELECTRICAL-CONDUCTIVITY; ZONES; YIELD; DEFINITION; ATTRIBUTES; SYSTEM																WoS
Pires, Msd, Alves, Md, Pozza, Ea		Multispectral Radiometric Characterization Of Coffee Rust Epidemic In Different Irrigation Management Systems	2020	International Journal Of Applied Earth Observation And Geoinformation	86						3	10.1016/j.jag.2019.102016		Federal University of Lavras, brazil; Federal University of Lavras, brazil;	Alves, MD (corresponding author), Univ Fed Lavras, Agr Engn Dept, POB 3037, BR-37200000 Lavras, MG, Brazil.	Coffea arabica L.; Hemileia vastatrix Berk. & Br.; Remote sensing; Spectral signature	LEAF; STRESS; WHEAT; ANTHRACNOSE; LEAVES; YIELD; BLAST; SPOT																WoS
Da Silva, Mb, Partelli, Fl, Gontijo, I, Caldas, Mm		Nutritional Balance And Its Relationship To Yield In A Coffee Field: Inferences From Geospatial Analysis	2020	Revista Brasileira De Engenharia Agricola E Ambiental	24	12		834	839		0	10.1590/1807-1929/agriambi.v24n12p834-839		Federal University of Espírito Santo, brazil ; Kansas State University, States United	Gontijo, I (corresponding author), Univ Fed Espirito Santo, Dept Ciencias Agr & Biol, Sao Mateus, ES, Brazil.	Coffea canephora; geostatistics; plant nutrition	INTEGRATED-SYSTEM DRIS; DIAGNOSIS																WoS
Almeida, Ld, Guimaraes, Ec		Precision Agriculture: An Alert To Imprecision - Case Study On Coffee Growing	2017	Revista De Agricultura Neotropical	4	2		41	48		1			Federal University of Uberlandia, brazil ;	Almeida, LD (corresponding author), Univ Fed Uberlandia, Uberlandia, MG, Brazil.	Geostatistics; Precision coffee makers; Coffee management; Ordinary kriging	SPATIAL VARIABILITY; CHEMICAL ATTRIBUTES; CULTIVATION; YIELD; MANAGEMENT																WoS
Cortez, Mlj, Alves, Md, Carvalho, Gr, Pozza, Ea		Relationship Between Sentinel-2 Orbital Data And In Situ Monitoring Of Coffee Rust	2020	Sn Applied Sciences	2	8					1	10.1007/s42452-020-03257-1		Federal University of Lavras, brazil; Empresa Pesquisa Agricola de Minas Gerais, brazil ; Federal University of Lavras, brazil;	Cortez, MLJ (corresponding author), Univ Fed Lavras, Agr Engn Dept, Lavras, MG, Brazil.	Remote sensing; Vegetation indices; Precision agriculture; Sentinel-2	BROWN EYE SPOT; LEAF RUST; QUANTITATIVE ESTIMATION; CHLOROPHYLL CONTENT; MANAGEMENT; STRESS; SHADE																WoS
Marin, Db, Ferraz, Gaes, Guimaraes, Phs, Schwerz, F, Santana, Ls, Barbosa, Bds, Barata, Rap, Faria, Rd, Dias, Jel, Conti, L, Rossi, G		Remotely Piloted Aircraft And Random Forest In The Evaluation Of The Spatial Variability Of Foliar Nitrogen In Coffee Crop	2021	Remote Sensing	13	8					0	10.3390/rs13081471		Federal University of Lavras, brazil; Federal University of Lavras, brazil; University Florence, Italy;	Marin, DB (corresponding author), Univ Fed Lavras, Agr Engn Dept, BR-37200000 Lavras, Brazil.	machine learning; vegetation indices; unmanned aerial vehicle; nitrogen management; RGB camera	LEAF CHLOROPHYLL CONTENT; MULTISPECTRAL IMAGES; VEGETATION INDEXES; NUTRITION INDEX; PLANT HEIGHT; ROC CURVE; BIOMASS; CLASSIFICATION; PREDICTION; AGRICULTURE																WoS
Felix, Fc, Avalos, Fap, De Lima, W, Candido, Bm, Silva, Mln, Mincato, Rl		Seasonal Behavior Of Vegetation Determined By Sensor On An Unmanned Aerial Vehicle	2021	Anais Da Academia Brasileira De Ciencias	93	1					0	10.1590/0001-3765202120200712		Instituto Agronomo de Campinas, brazil ; Federal University of Lavras, brazil; Instituto Agronomo de Campinas, brazil ; Federal University of Alfenas, brazil ;	Mincato, RL (corresponding author), Univ Fed Alfenas UNIFAL MG, Inst Ciencias Nat, Rua Gabriel Monteiro da Silva 700, BR-37130001 Alfenas, MG, Brazil.	Coffea spp.; Eucalyptus spp.; Forest Remnants; Pinus spp.; vegetation Indices																	WoS
Giraldo, Pjr, Aguirre, Ag, Munoz, Cm, Prieto, Fa, Oliveros, Ce		Sensor Fusion Of A Mobile Device To Control And Acquire Videos Or Images Of Coffee Branches And For Georeferencing Trees	2017	Sensors	17	4					2	10.3390/s17040786		Ctr Nacl Invest Cafe, Colombia; Universidad Nacional de Colombia; Colombia;	Giraldo, PJR (corresponding author), Ctr Nacl Invest Cafe, Manizales 170009, Colombia.; Giraldo, PJR (corresponding author), Univ Nacl Colombia, Bogota 11001, Colombia.	sensor fusion; precision agriculture; machine vision; smartphone; image quality; field conditions; coffee plantation	EXPERT-SYSTEM; VISION; APP																WoS
Chemura, A, Mutanga, O, Dube, T		Separability Of Coffee Leaf Rust Infection Levels With Machine Learning Methods At Sentinel-2 Msi Spectral Resolutions	2017	Precision Agriculture	18	5		859	881		45	10.1007/s11119-016-9495-0		University KwaZulu Natal, South Africa; Chinhoyi University of Technology, Zimbabwe; University of Limpopo, South Africa	Chemura, A (corresponding author), Univ KwaZulu Natal, Sch Agr Earth & Environm Sci, Dept Geog, P Bag X01, ZA-3209 Pietermaritzburg, South Africa.; Chemura, A (corresponding author), Chinhoyi Univ Technol, Environm Sci & Technol Dept, P Bag 7724, Chinhoyi, Zimbabwe.	Hemileia vastatrix; Disease discrimination; Red edge; Random forest; Variable optimization	RANDOM FOREST CLASSIFIER; NDVI TIME-SERIES; VEGETATION INDEXES; QUANTITATIVE ESTIMATION; WATER-STRESS; WHEAT; IDENTIFICATION; CHLOROPHYLL; BIOMASS; SUITABILITY																WoS
Silva, Bm, Dos Santos, Wjr, De Oliveira, Gc, De Lima, Jm, Curi, N, Marques, Jj		Soil Moisture Space-Time Analysis To Support Improved Crop Management	2015	Ciencia E Agrotecnologia	39	1		39	47		4	10.1590/S1413-70542015000100005		federal university of lavras, brazil; Instituto Federal de Educação, Ciência e Tecnologia do Sul de Minas Gerais, Muzambinho, MG, brazil ;	Silva, BM (corresponding author), Univ Fed Lavras UFLA, Dept Ciencia Solo, Cx P 3037, BR-37200000 Lavras, MG, Brazil.	Water use efficiency; soil management; deep soil tillage; plant-available water; arabica coffee	LIMITING WATER RANGE; SPATIAL VARIABILITY; PHYSICAL QUALITY; COFFEE; AVAILABILITY; SYSTEMS; GROWTH; OXISOL																WoS
Silvan, Sd, Lima, Jsd, De Oliveira, Rb, De Souza, Gs, Silva, Mde		Space Analysis Of Water Erosion In The Red-Yellow Latosol Under Conilon Coffee Cultivation	2007	Revista Ciencia Agronomica	38	4		335	342		5			Federal University of Espírito Santo, brazil ; Federal University of Espírito Santo, brazil ; State University São Paulo, brazil ; Centro de Ciências Agrárias, brazil ;	Silvan, SD (corresponding author), Bairro Alto Univ, UFES, CCA, Caixa Postal 16, BR-29500000 Alegre, ES, Brazil.	spatial variability; geoestatistics; soil conservation; Coffea canephora Pierre x froenher																	WoS
Partelli, Fl, Cavalcanti, Ac, Menegardo, C, Covre, Am, Gontijo, I, Braun, H		Spatial Distribution Of The Root System Of Conilon And Arabica Coffee Plants	2020	Pesquisa Agropecuaria Brasileira	55						0	10.1590/S1678-3921.pab2020.v55.01333		Federal University of Espírito Santo, brazil ; Universidade Estadual Maranhão, brazil ; University of São Paulo, Brazil;	Partelli, FL (corresponding author), Univ Fed Espirito Santo, Ctr Univ Norte Espirito Santo, Rodovia BR-101,Km 60, BR-29932540 Sao Mateus, ES, Brazil.	Coffea arabica; Coffea canephora; semiovariogram; soil profile	VARIABILITY; DROUGHT; CANEPHORA; TOLERANT; YIELD																WoS
Santos, Eod, Gontijo, I, Silva, Mb, Neto, Apd		Spatial Variability Of Macronutrients In A Crop Of Conilon Coffee In The North Of Espirito Santo	2015	Revista Ciencia Agronomica	46	3		469	476		3	10.5935/1806-6690.20150028		Federal University of Espírito Santo, brazil ; Federal University of Espírito Santo, brazil ; Federal University of Espírito Santo, brazil ;	Santos, EOD (corresponding author), Univ Fed Espirito Santo, Ctr Univ Norte Espirito Santo, Programa Posgrad Agr Trop, Campus Sao Mateus,BR 101 Norte,Km 60, BR-29932540 Sao Mateus, ES, Brazil.	Geostatistics; Chemical attributes; Coffea canephora	SOIL CHEMICAL ATTRIBUTES; NO																WoS
Carducci, Ce, Oliveira, Gc, Curi, N, Rossoni, Df, Costa, Al, Heck, Rj		Spatial Variability Of Pores In Oxidic Latosol Under A Conservation Management System With Different Gypsium Doses	2014	Ciencia E Agrotecnologia	38	5		445	460		4	10.1590/S1413-70542014000500004		Federal University of Santa Catarina, brazil ; Federal University of Lavras, brazil; Stade University Maringa, brazil ; University Guelph, Canada	Carducci, CE (corresponding author), Univ Fed Santa Catarina, Rod Ulysses Gaboardi,Km 3,Cx P 101, BR-89520000 Curitibanos, SC, Brazil.	X-ray CT scan; spatial pore continuity; pores distribution; coffee crop	RAY COMPUTED-TOMOGRAPHY; BULK-DENSITY; RED LATOSOL; OXISOL; ATTRIBUTES; PASTURE; SOILS; STATE; CROP																WoS
Kamimura, Km, Dias, Md, De Oliveira, Ms, Dos Santos, Gr, Guimaraes, Ptg, Ajayi, Ae		Spatial Variability Of Precompression Stress And Volumetric Water Content Of A Red-Yellow Latosol (Oxisol)	2020	Bioscience Journal	36	1		142	151		0	10.14393/BJ-v36n1a2020-42121		Federal University of Mato Grosso do Sul, brazil ; Federal University of Lavras, brazil; Federal University of Vicosa, brazil ; Empresa Pesquisa Agricola Minas Gerais, brazil ; Federal University of Technol Akure, Nigeria	Kamimura, KM (corresponding author), Univ Fed Mato Grosso do Sul, Campus Chapadao do Sul UFMS CPCS, Chapadao Do Sul, MS, Brazil.	Compaction; Geostatistics; Load-bearing capacity	LOAD-BEARING CAPACITY; PRECONSOLIDATION PRESSURE; SOIL; IMPACT																WoS
Marin, Db, Ferraz, Gaes, Schwerz, F, Barata, Rap, Faria, Rd, Dias, Jel		Unmanned Aerial Vehicle To Evaluate Frost Damage In Coffee Plants		Precision Agriculture							0	10.1007/s11119-021-09815-w		federal university of lavras, brazil;	Marin, DB (corresponding author), Univ Fed Lavras, Dept Agr Engn, POB 3037, BR-37200000 Lavras, MG, Brazil.	Remote sensing; Vegetation indices; Multispectral images; UAV	VEGETATION INDEXES; REFLECTANCE; TEMPERATURE; MODIS; IDENTIFICATION; GENOTYPES; IMAGERY; STRESS																WoS
Nogueira, Vhb, Diotto, Av, Thebaldi, Ms, Colombo, A, Silva, Yf, Lima, Emd, Resende, Gfl		Variation In The Flow Rate Of Drip Emitters In A Subsurface Irrigation System For Different Soil Types	2021	Agricultural Water Management	243						0	10.1016/j.agwat.2020.106485		federal university of lavras, brazil;	Nogueira, VHB (corresponding author), Univ Fed Lavras, Dept Water Resources, BR-37200900 Lavras, Brazil.	Subsurface drip irrigation (SDI); Small depths; Soils; Soil water movement	LATERAL HYDRAULIC PERFORMANCE; SPATIAL VARIABILITY; WATER RETENTION; LIMITING FLOW; CONDUCTIVITY; DISCHARGE																WoS
Mendes, H, Tavares, As, Dos Santos, Wjr, Silva, Mln, Santos, Br, Mincato, Rl		Water Erosion In Oxisols Under Coffee Cultivation	2018	Revista Brasileira De Ciencia Do Solo	42						3	10.1590/18069657rbcs20170093		Federal University of Alfenas, brazil ; Instituto Federal Educional Ciencia & Tecnologia do Sul Minas Gerais, brazil ; Federal University of Lavras, brazil; Federal University of Alfenas, brazil ;	Mincato, RL (corresponding author), Univ Fed Alfenas, Inst Ciencias Nat, Alfenas, MG, Brazil.	soil loss; RUSLE; soil loss tolerance	MINAS-GERAIS STATE; SOIL-EROSION; LATOSOLS OXISOLS; EUROPEAN SCALE; RIVER-BASIN; RED LATOSOL; BRAZIL; EUCALYPTUS; MODELS; FOREST																WoS
